# Supplementary material
Source: PubMed Central journal article supplement (PMC6909793)
Supplement: Supplementary_Data.pdf [file Supplementary_Data.pdf]

Table SI. Downregulated differentially expressed miRNAs.

| miRNA_ID        | logFC        | Organism     | P-value                   | adj.P-val                 |
|-----------------|--------------|--------------|---------------------------|---------------------------|
| hsa-miR-224     | -3.611364018 | Homo sapiens | 4.704541X10 <sup>-4</sup> | 9.492047X10 <sup>-2</sup> |
| hsa-miR-552     | -2.47550072  | Homo sapiens | 1.969810X10 <sup>-3</sup> | 2.048602X10 <sup>-1</sup> |
| hsa-miR-452     | -3.911955824 | Homo sapiens | 3.519551X10 <sup>-3</sup> | 3.050277X10 <sup>-1</sup> |
| hsa-miR-632     | -6.306017809 | Homo sapiens | 4.193914X10 <sup>-3</sup> | 3.115479X10 <sup>-1</sup> |
| hsa-miR-338-3p  | -2.313799507 | Homo sapiens | 1.281004X10 <sup>-2</sup> | 4.938729X10 <sup>-1</sup> |
| hsa-miR-613     | -3.656453617 | Homo sapiens | 1.430181X10 <sup>-2</sup> | 4.957961X10 <sup>-1</sup> |
| hsa-miR-100     | -4.555884576 | Homo sapiens | 1.231372X10 <sup>-2</sup> | 4.938729X10 <sup>-1</sup> |
| hsa-miR-155     | -4.13799782  | Homo sapiens | 1.543739X10 <sup>-2</sup> | 5.017153X10 <sup>-1</sup> |
| hsa-miR-558     | -4.671272624 | Homo sapiens | 1.329658X10 <sup>-2</sup> | 4.938729X10 <sup>-1</sup> |
| hsa-miR-199a-5p | -9.212635703 | Homo sapiens | 9.381811X10 <sup>-3</sup> | 4.938729X10 <sup>-1</sup> |
| hsa-miR-506     | -5.088160255 | Homo sapiens | 2.376149X10 <sup>-2</sup> | 5.709080X10 <sup>-1</sup> |
| hsa-miR-518a-3p | -3.617471157 | Homo sapiens | 2.452572X10 <sup>-2</sup> | 5.709080X10 <sup>-1</sup> |
| hsa-miR-204     | -6.084012321 | Homo sapiens | 3.266813X10 <sup>-2</sup> | 5.709080X10 <sup>-1</sup> |
| hsa-miR-30a     | -3.265247816 | Homo sapiens | 3.812119X10 <sup>-2</sup> | 5.712206X10 <sup>-1</sup> |
| hsa-miR-302a    | -4.865908616 | Homo sapiens | 4.296057X10 <sup>-2</sup> | 5.712206X10 <sup>-1</sup> |
| hsa-miR-329     | -2.921631153 | Homo sapiens | 4.497473X10 <sup>-2</sup> | 5.712206X10 <sup>-1</sup> |
| hsa-miR-29b-1   | -1.262992593 | Homo sapiens | 3.492042X10 <sup>-2</sup> | 5.709080X10 <sup>-1</sup> |
| hsa-miR-489     | -2.928682264 | Homo sapiens | 4.521176X10 <sup>-2</sup> | 5.712206X10 <sup>-1</sup> |
| hsa-miR-302d    | -4.875872112 | Homo sapiens | 4.723555X10 <sup>-2</sup> | 5.712206X10 <sup>-1</sup> |
| hsa-miR-215     | -1.623325417 | Homo sapiens | 4.692535X10 <sup>-2</sup> | 5.712206X10 <sup>-1</sup> |

miRNA, microRNA; hsa, Homo sapiens; FC, fold change; adj.P-val, adjusted P-value

Table SII. miRNA-gene co-expression associations.

| miRNA          | Gene     | Correlationvalue |
|----------------|----------|------------------|
| hsa-miR-224    | IFI27    | -0.930379067     |
| hsa-miR-29b-1  | IFI27    | -0.975700088     |
| hsa-miR-338-3p | IFI27    | -0.948161986     |
| hsa-miR-552    | IFI27    | -0.960106383     |
| hsa-miR-149    | PDZK1IP1 | -0.947298992     |
| hsa-miR-193b   | PDZK1IP1 | -0.940186827     |
| hsa-miR-210    | PDZK1IP1 | -0.954477577     |
| hsa-miR-505    | PDZK1IP1 | -0.95412915      |
| hsa-miR-770-5p | PDZK1IP1 | -0.971974925     |
| hsa-miR-224    | IGFBP7   | -0.933347592     |
| hsa-miR-29b-1  | IGFBP7   | -0.972061302     |
| hsa-miR-338-3p | IGFBP7   | -0.952124771     |
| hsa-miR-452    | IGFBP7   | -0.929714157     |
| hsa-miR-552    | IGFBP7   | -0.964923427     |
| hsa-miR-29b-1  | BST2     | -0.975423495     |
| hsa-miR-338-3p | BST2     | -0.919356313     |
| hsa-miR-452    | BST2     | -0.921424406     |

|                |          |              |
|----------------|----------|--------------|
| hsa-miR-552    | BST2     | -0.954485572 |
| hsa-miR-215    | ARMCX4   | -0.927014731 |
| hsa-miR-224    | ARMCX4   | -0.943098372 |
| hsa-miR-29b-1  | ARMCX4   | -0.941096095 |
| hsa-miR-338-3p | ARMCX4   | -0.930146561 |
| hsa-miR-552    | ARMCX4   | -0.958675854 |
| hsa-miR-224    | RPS23    | -0.938402886 |
| hsa-miR-29b-1  | RPS23    | -0.976974373 |
| hsa-miR-338-3p | RPS23    | -0.928793417 |
| hsa-miR-552    | RPS23    | -0.963377061 |
| hsa-miR-29b-1  | ATP6AP1L | -0.931120963 |
| hsa-miR-552    | ATP6AP1L | -0.922322097 |
| hsa-miR-149    | GLIPR1   | -0.938368151 |
| hsa-miR-193b   | GLIPR1   | -0.933893543 |
| hsa-miR-210    | GLIPR1   | -0.94973856  |
| hsa-miR-505    | GLIPR1   | -0.956990354 |
| hsa-miR-770-5p | GLIPR1   | -0.956944111 |
| hsa-miR-224    | CMPK2    | -0.94325894  |
| hsa-miR-29b-1  | CMPK2    | -0.987773898 |
| hsa-miR-552    | CMPK2    | -0.982400054 |
| hsa-miR-224    | PRSS1    | -0.902427417 |
| hsa-miR-29b-1  | PRSS1    | -0.971377108 |
| hsa-miR-338-3p | PRSS1    | -0.916380919 |
| hsa-miR-552    | PRSS1    | -0.942139059 |
| hsa-miR-224    | DNAJC15  | -0.908017642 |
| hsa-miR-29b-1  | DNAJC15  | -0.980890122 |
| hsa-miR-552    | DNAJC15  | -0.964119432 |
| hsa-miR-224    | NNMT     | -0.926692974 |
| hsa-miR-29b-1  | NNMT     | -0.993312603 |
| hsa-miR-552    | NNMT     | -0.97598344  |
| hsa-miR-29b-1  | ANXA13   | -0.941502353 |
| hsa-miR-552    | ANXA13   | -0.918453811 |
| hsa-miR-155    | SAMHD1   | -0.912004286 |
| hsa-miR-215    | SAMHD1   | -0.957785858 |
| hsa-miR-224    | SAMHD1   | -0.962102988 |
| hsa-miR-29b-1  | SAMHD1   | -0.939333494 |
| hsa-miR-338-3p | SAMHD1   | -0.960648518 |
| hsa-miR-452    | SAMHD1   | -0.918461558 |
| hsa-miR-552    | SAMHD1   | -0.964774825 |
| hsa-miR-224    | SSBP2    | -0.932921173 |
| hsa-miR-29b-1  | SSBP2    | -0.983625861 |
| hsa-miR-552    | SSBP2    | -0.977672808 |
| hsa-miR-224    | IFI44    | -0.940214923 |
| hsa-miR-29b-1  | IFI44    | -0.995715634 |

|                |         |              |
|----------------|---------|--------------|
| hsa-miR-338-3p | IFI44   | -0.910348665 |
| hsa-miR-552    | IFI44   | -0.981507319 |
| hsa-miR-29b-1  | FAIM2   | -0.908923909 |
| hsa-miR-552    | FAIM2   | -0.901716507 |
| hsa-miR-224    | HCP5    | -0.92422282  |
| hsa-miR-29b-1  | HCP5    | -0.970920807 |
| hsa-miR-452    | HCP5    | -0.900329091 |
| hsa-miR-552    | HCP5    | -0.961063378 |
| hsa-miR-224    | ATG10   | -0.934241334 |
| hsa-miR-29b-1  | ATG10   | -0.97410715  |
| hsa-miR-338-3p | ATG10   | -0.930432814 |
| hsa-miR-552    | ATG10   | -0.95752139  |
| hsa-miR-224    | CD99    | -0.918706915 |
| hsa-miR-29b-1  | CD99    | -0.988839285 |
| hsa-miR-552    | CD99    | -0.975201974 |
| hsa-miR-224    | SCIN    | -0.931143231 |
| hsa-miR-29b-1  | SCIN    | -0.980800765 |
| hsa-miR-338-3p | SCIN    | -0.905589052 |
| hsa-miR-552    | SCIN    | -0.973094114 |
| hsa-miR-29b-1  | IFITM2  | -0.966778797 |
| hsa-miR-552    | IFITM2  | -0.93690541  |
| hsa-miR-29b-1  | ZCCHC9  | -0.93313652  |
| hsa-miR-552    | ZCCHC9  | -0.927703675 |
| hsa-miR-224    | BGN     | -0.924322848 |
| hsa-miR-29b-1  | BGN     | -0.984614462 |
| hsa-miR-552    | BGN     | -0.973479236 |
| hsa-miR-29b-1  | PLTP    | -0.953964079 |
| hsa-miR-552    | PLTP    | -0.935872086 |
| hsa-miR-224    | FERMT1  | -0.920290061 |
| hsa-miR-29b-1  | FERMT1  | -0.975432931 |
| hsa-miR-552    | FERMT1  | -0.965250043 |
| hsa-miR-224    | XRCC4   | -0.930008873 |
| hsa-miR-29b-1  | XRCC4   | -0.980042323 |
| hsa-miR-452    | XRCC4   | -0.911820547 |
| hsa-miR-552    | XRCC4   | -0.980781117 |
| hsa-miR-149    | SLC19A1 | -0.904741985 |
| hsa-miR-210    | SLC19A1 | -0.926355861 |
| hsa-miR-505    | SLC19A1 | -0.944586491 |
| hsa-miR-770-5p | SLC19A1 | -0.943325495 |
| hsa-miR-224    | CLEC4G  | -0.909646547 |
| hsa-miR-29b-1  | CLEC4G  | -0.977989741 |
| hsa-miR-338-3p | CLEC4G  | -0.921398704 |
| hsa-miR-552    | CLEC4G  | -0.946115527 |
| hsa-miR-29b-1  | EML2    | -0.974712294 |

|                |          |              |
|----------------|----------|--------------|
| hsa-miR-552    | EML2     | -0.958038542 |
| hsa-miR-224    | DNAJA4   | -0.918295918 |
| hsa-miR-29b-1  | DNAJA4   | -0.980767671 |
| hsa-miR-552    | DNAJA4   | -0.970342504 |
| hsa-miR-149    | CACNG4   | -0.929992594 |
| hsa-miR-193b   | CACNG4   | -0.914701476 |
| hsa-miR-210    | CACNG4   | -0.939777055 |
| hsa-miR-505    | CACNG4   | -0.933134821 |
| hsa-miR-770-5p | CACNG4   | -0.98546714  |
| hsa-miR-224    | ZDHHC2   | -0.929281576 |
| hsa-miR-29b-1  | ZDHHC2   | -0.990330624 |
| hsa-miR-338-3p | ZDHHC2   | -0.928634479 |
| hsa-miR-552    | ZDHHC2   | -0.968132889 |
| hsa-miR-224    | FLJ32255 | -0.929842641 |
| hsa-miR-29b-1  | FLJ32255 | -0.995337535 |
| hsa-miR-552    | FLJ32255 | -0.981427848 |
| hsa-miR-224    | MAPRE2   | -0.934186077 |
| hsa-miR-29b-1  | MAPRE2   | -0.98987915  |
| hsa-miR-452    | MAPRE2   | -0.910314937 |
| hsa-miR-552    | MAPRE2   | -0.978375173 |
| hsa-miR-224    | VNN1     | -0.907639226 |
| hsa-miR-29b-1  | VNN1     | -0.927925494 |
| hsa-miR-552    | VNN1     | -0.909736275 |
| hsa-miR-224    | HLA-B    | -0.942686522 |
| hsa-miR-29b-1  | HLA-B    | -0.975016448 |
| hsa-miR-338-3p | HLA-B    | -0.954666633 |
| hsa-miR-452    | HLA-B    | -0.916957617 |
| hsa-miR-552    | HLA-B    | -0.968671799 |
| hsa-miR-224    | NAV1     | -0.911075362 |
| hsa-miR-29b-1  | NAV1     | -0.99197652  |
| hsa-miR-552    | NAV1     | -0.960443175 |
| hsa-miR-224    | FGF19    | -0.928115338 |
| hsa-miR-29b-1  | FGF19    | -0.978259649 |
| hsa-miR-452    | FGF19    | -0.900012594 |
| hsa-miR-552    | FGF19    | -0.97927823  |
| hsa-miR-224    | HLA-C    | -0.942273564 |
| hsa-miR-29b-1  | HLA-C    | -0.9955339   |
| hsa-miR-338-3p | HLA-C    | -0.923709167 |
| hsa-miR-452    | HLA-C    | -0.905961183 |
| hsa-miR-552    | HLA-C    | -0.98328461  |
| hsa-miR-224    | BLVRA    | -0.924710972 |
| hsa-miR-29b-1  | BLVRA    | -0.991597275 |
| hsa-miR-338-3p | BLVRA    | -0.904509435 |
| hsa-miR-452    | BLVRA    | -0.90109094  |

|                |          |              |
|----------------|----------|--------------|
| hsa-miR-552    | BLVRA    | -0.971847913 |
| hsa-miR-224    | TMEM167A | -0.945791053 |
| hsa-miR-29b-1  | TMEM167A | -0.990705412 |
| hsa-miR-338-3p | TMEM167A | -0.934959487 |
| hsa-miR-452    | TMEM167A | -0.901366156 |
| hsa-miR-552    | TMEM167A | -0.98082381  |
| hsa-miR-224    | FXYD3    | -0.931623309 |
| hsa-miR-29b-1  | FXYD3    | -0.983714602 |
| hsa-miR-338-3p | FXYD3    | -0.94516979  |
| hsa-miR-552    | FXYD3    | -0.966438629 |
| hsa-miR-29b-1  | LRR50    | -0.950766979 |
| hsa-miR-552    | LRR50    | -0.943289476 |
| hsa-miR-215    | NOS3     | -0.918927844 |
| hsa-miR-338-3p | NOS3     | -0.937858302 |
| hsa-miR-224    | GNG2     | -0.93273941  |
| hsa-miR-29b-1  | GNG2     | -0.983671123 |
| hsa-miR-338-3p | GNG2     | -0.946329    |
| hsa-miR-452    | GNG2     | -0.930889551 |
| hsa-miR-552    | GNG2     | -0.973632018 |
| hsa-miR-224    | DHFR     | -0.92204671  |
| hsa-miR-29b-1  | DHFR     | -0.98075114  |
| hsa-miR-338-3p | DHFR     | -0.91351774  |
| hsa-miR-552    | DHFR     | -0.969880102 |
| hsa-miR-770-5p | ZNF599   | -0.953869147 |
| hsa-miR-224    | SLC39A4  | -0.908825886 |
| hsa-miR-29b-1  | SLC39A4  | -0.979736333 |
| hsa-miR-552    | SLC39A4  | -0.96058743  |
| hsa-miR-224    | C5orf39  | -0.916461807 |
| hsa-miR-29b-1  | C5orf39  | -0.966636772 |
| hsa-miR-552    | C5orf39  | -0.958303784 |
| hsa-miR-224    | IFITM1   | -0.936468774 |
| hsa-miR-29b-1  | IFITM1   | -0.992933232 |
| hsa-miR-338-3p | IFITM1   | -0.933620988 |
| hsa-miR-452    | IFITM1   | -0.909793588 |
| hsa-miR-552    | IFITM1   | -0.979533814 |
| hsa-miR-29b-1  | ZNF83    | -0.982608319 |
| hsa-miR-552    | ZNF83    | -0.948477049 |
| hsa-miR-224    | DDX60    | -0.943130992 |
| hsa-miR-29b-1  | DDX60    | -0.990274563 |
| hsa-miR-338-3p | DDX60    | -0.918091047 |
| hsa-miR-452    | DDX60    | -0.917349638 |
| hsa-miR-552    | DDX60    | -0.986828095 |
| hsa-miR-29b-1  | ISG20    | -0.965185897 |
| hsa-miR-552    | ISG20    | -0.943829633 |

|                |              |              |
|----------------|--------------|--------------|
| hsa-miR-224    | LOC100131067 | -0.928435678 |
| hsa-miR-29b-1  | LOC100131067 | -0.987441483 |
| hsa-miR-452    | LOC100131067 | -0.906566781 |
| hsa-miR-552    | LOC100131067 | -0.973401486 |
| hsa-miR-224    | ALCAM        | -0.931211223 |
| hsa-miR-29b-1  | ALCAM        | -0.976564199 |
| hsa-miR-338-3p | ALCAM        | -0.914167832 |
| hsa-miR-552    | ALCAM        | -0.96506315  |
| hsa-miR-215    | PLCB4        | -0.905834901 |
| hsa-miR-224    | PLCB4        | -0.918689999 |
| hsa-miR-29b-1  | PLCB4        | -0.96852067  |
| hsa-miR-338-3p | PLCB4        | -0.957448562 |
| hsa-miR-552    | PLCB4        | -0.952725209 |
| hsa-miR-224    | PLAC8        | -0.927495798 |
| hsa-miR-29b-1  | PLAC8        | -0.978840947 |
| hsa-miR-338-3p | PLAC8        | -0.941754567 |
| hsa-miR-552    | PLAC8        | -0.965869941 |
| hsa-miR-224    | FKRP         | -0.920501232 |
| hsa-miR-29b-1  | FKRP         | -0.984335888 |
| hsa-miR-452    | FKRP         | -0.909593764 |
| hsa-miR-552    | FKRP         | -0.976044594 |
| hsa-miR-224    | PRKCA        | -0.936207672 |
| hsa-miR-29b-1  | PRKCA        | -0.989137849 |
| hsa-miR-552    | PRKCA        | -0.982279395 |
| hsa-miR-224    | LOC401324    | -0.915104388 |
| hsa-miR-29b-1  | LOC401324    | -0.976669831 |
| hsa-miR-452    | LOC401324    | -0.903117539 |
| hsa-miR-552    | LOC401324    | -0.966289906 |
| hsa-miR-224    | COMP         | -0.924498037 |
| hsa-miR-29b-1  | COMP         | -0.984134206 |
| hsa-miR-452    | COMP         | -0.901499296 |
| hsa-miR-552    | COMP         | -0.971960069 |
| hsa-miR-224    | GBP1         | -0.923932672 |
| hsa-miR-29b-1  | GBP1         | -0.985092613 |
| hsa-miR-452    | GBP1         | -0.904063057 |
| hsa-miR-552    | GBP1         | -0.972877016 |
| hsa-miR-224    | VCAN         | -0.925379177 |
| hsa-miR-29b-1  | VCAN         | -0.982009534 |
| hsa-miR-338-3p | VCAN         | -0.901983427 |
| hsa-miR-552    | VCAN         | -0.969636238 |
| hsa-miR-224    | PECI         | -0.948313867 |
| hsa-miR-29b-1  | PECI         | -0.984834952 |
| hsa-miR-338-3p | PECI         | -0.942616545 |
| hsa-miR-452    | PECI         | -0.900701908 |

|                |           |              |
|----------------|-----------|--------------|
| hsa-miR-552    | PECI      | -0.976464328 |
| hsa-miR-224    | SLC16A4   | -0.917305108 |
| hsa-miR-29b-1  | SLC16A4   | -0.994858069 |
| hsa-miR-338-3p | SLC16A4   | -0.91778434  |
| hsa-miR-552    | SLC16A4   | -0.965224382 |
| hsa-miR-224    | ZNF655    | -0.945585893 |
| hsa-miR-29b-1  | ZNF655    | -0.995718512 |
| hsa-miR-452    | ZNF655    | -0.903673665 |
| hsa-miR-552    | ZNF655    | -0.987061154 |
| hsa-miR-29b-1  | PHC1      | -0.964434904 |
| hsa-miR-338-3p | PHC1      | -0.93856058  |
| hsa-miR-552    | PHC1      | -0.947558888 |
| hsa-miR-29b-1  | MATN2     | -0.971079625 |
| hsa-miR-552    | MATN2     | -0.94977449  |
| hsa-miR-29b-1  | PIK3AP1   | -0.981309543 |
| hsa-miR-552    | PIK3AP1   | -0.954870944 |
| hsa-miR-224    | CADPS2    | -0.948863886 |
| hsa-miR-29b-1  | CADPS2    | -0.995265045 |
| hsa-miR-338-3p | CADPS2    | -0.916668107 |
| hsa-miR-452    | CADPS2    | -0.910588932 |
| hsa-miR-552    | CADPS2    | -0.987920512 |
| hsa-miR-224    | LOC342918 | -0.937336331 |
| hsa-miR-29b-1  | LOC342918 | -0.990744481 |
| hsa-miR-338-3p | LOC342918 | -0.928161398 |
| hsa-miR-552    | LOC342918 | -0.974747315 |
| hsa-miR-224    | ZIC2      | -0.917361881 |
| hsa-miR-29b-1  | ZIC2      | -0.979350888 |
| hsa-miR-338-3p | ZIC2      | -0.900656638 |
| hsa-miR-452    | ZIC2      | -0.921333629 |
| hsa-miR-552    | ZIC2      | -0.973955674 |
| hsa-miR-224    | IFI16     | -0.963432846 |
| hsa-miR-29b-1  | IFI16     | -0.987359555 |
| hsa-miR-338-3p | IFI16     | -0.917237772 |
| hsa-miR-552    | IFI16     | -0.988411326 |
| hsa-miR-29b-1  | TAP1      | -0.952102447 |
| hsa-miR-338-3p | TAP1      | -0.93055886  |
| hsa-miR-552    | TAP1      | -0.915395966 |
| hsa-miR-224    | VMA21     | -0.911128244 |
| hsa-miR-29b-1  | VMA21     | -0.981737589 |
| hsa-miR-552    | VMA21     | -0.96647319  |
| hsa-miR-224    | KBTBD11   | -0.901040397 |
| hsa-miR-29b-1  | KBTBD11   | -0.969324054 |
| hsa-miR-552    | KBTBD11   | -0.956635541 |
| hsa-miR-224    | SLC5A4    | -0.932776805 |

|                |         |              |
|----------------|---------|--------------|
| hsa-miR-29b-1  | SLC5A4  | -0.984627814 |
| hsa-miR-338-3p | SLC5A4  | -0.904184518 |
| hsa-miR-552    | SLC5A4  | -0.977050101 |
| hsa-miR-224    | CNTNAP2 | -0.923404663 |
| hsa-miR-29b-1  | CNTNAP2 | -0.990341652 |
| hsa-miR-452    | CNTNAP2 | -0.904223688 |
| hsa-miR-552    | CNTNAP2 | -0.976770206 |
| hsa-miR-224    | AKR1C1  | -0.946089742 |
| hsa-miR-29b-1  | AKR1C1  | -0.983584252 |
| hsa-miR-338-3p | AKR1C1  | -0.901481837 |
| hsa-miR-452    | AKR1C1  | -0.918091072 |
| hsa-miR-552    | AKR1C1  | -0.980873444 |
| hsa-miR-29b-1  | MMP28   | -0.951014837 |
| hsa-miR-552    | MMP28   | -0.942730294 |
| hsa-miR-29b-1  | PRSS12  | -0.974742655 |
| hsa-miR-552    | PRSS12  | -0.957655198 |
| hsa-miR-29b-1  | RASSF5  | -0.958132107 |
| hsa-miR-552    | RASSF5  | -0.951260639 |
| hsa-miR-149    | BNIP3L  | -0.93224999  |
| hsa-miR-193b   | BNIP3L  | -0.943279144 |
| hsa-miR-210    | BNIP3L  | -0.932709011 |
| hsa-miR-505    | BNIP3L  | -0.934764769 |
| hsa-miR-770-5p | BNIP3L  | -0.940055889 |
| hsa-miR-224    | FBXO25  | -0.923454592 |
| hsa-miR-29b-1  | FBXO25  | -0.999162057 |
| hsa-miR-552    | FBXO25  | -0.972202802 |
| hsa-miR-29b-1  | SH3RF2  | -0.943993039 |
| hsa-miR-552    | SH3RF2  | -0.921128331 |
| hsa-miR-215    | SLC38A5 | -0.90935742  |
| hsa-miR-224    | SLC38A5 | -0.934264369 |
| hsa-miR-29b-1  | SLC38A5 | -0.964055911 |
| hsa-miR-338-3p | SLC38A5 | -0.953930303 |
| hsa-miR-552    | SLC38A5 | -0.953836059 |
| hsa-miR-224    | HLA-G   | -0.928790992 |
| hsa-miR-29b-1  | HLA-G   | -0.990710609 |
| hsa-miR-338-3p | HLA-G   | -0.906095561 |
| hsa-miR-552    | HLA-G   | -0.975709398 |
| hsa-miR-224    | S100A4  | -0.930635023 |
| hsa-miR-29b-1  | S100A4  | -0.988553061 |
| hsa-miR-552    | S100A4  | -0.981474414 |
| hsa-miR-224    | LY6E    | -0.932687831 |
| hsa-miR-29b-1  | LY6E    | -0.991553953 |
| hsa-miR-452    | LY6E    | -0.900245547 |
| hsa-miR-552    | LY6E    | -0.983226514 |



|                |              |              |
|----------------|--------------|--------------|
| hsa-miR-215    | TAGLN        | -0.946239854 |
| hsa-miR-224    | TAGLN        | -0.9186231   |
| hsa-miR-29b-1  | TAGLN        | -0.938362208 |
| hsa-miR-338-3p | TAGLN        | -0.976600245 |
| hsa-miR-552    | TAGLN        | -0.937890554 |
| hsa-miR-224    | GAMT         | -0.940842178 |
| hsa-miR-29b-1  | GAMT         | -0.997504191 |
| hsa-miR-338-3p | GAMT         | -0.906947157 |
| hsa-miR-552    | GAMT         | -0.98370687  |
| hsa-miR-29b-1  | MYO7A        | -0.994915188 |
| hsa-miR-552    | MYO7A        | -0.960864323 |
| hsa-miR-224    | HAPLN1       | -0.932263846 |
| hsa-miR-29b-1  | HAPLN1       | -0.988993075 |
| hsa-miR-338-3p | HAPLN1       | -0.900629944 |
| hsa-miR-452    | HAPLN1       | -0.908553737 |
| hsa-miR-552    | HAPLN1       | -0.975870653 |
| hsa-miR-224    | AKR1C2       | -0.946282072 |
| hsa-miR-29b-1  | AKR1C2       | -0.98815932  |
| hsa-miR-338-3p | AKR1C2       | -0.91928182  |
| hsa-miR-452    | AKR1C2       | -0.92190141  |
| hsa-miR-552    | AKR1C2       | -0.988226091 |
| hsa-miR-224    | HBE1         | -0.910362243 |
| hsa-miR-29b-1  | HBE1         | -0.99914257  |
| hsa-miR-552    | HBE1         | -0.965997019 |
| hsa-miR-224    | DSE          | -0.904822878 |
| hsa-miR-29b-1  | DSE          | -0.989177691 |
| hsa-miR-552    | DSE          | -0.966694661 |
| hsa-miR-224    | ZFYVE16      | -0.941429136 |
| hsa-miR-29b-1  | ZFYVE16      | -0.989521367 |
| hsa-miR-338-3p | ZFYVE16      | -0.935070467 |
| hsa-miR-552    | ZFYVE16      | -0.974851581 |
| hsa-miR-215    | PLCXD1       | -0.912990485 |
| hsa-miR-224    | PLCXD1       | -0.931289261 |
| hsa-miR-29b-1  | PLCXD1       | -0.964848053 |
| hsa-miR-338-3p | PLCXD1       | -0.952990625 |
| hsa-miR-552    | PLCXD1       | -0.952997138 |
| hsa-miR-224    | NMI          | -0.927405866 |
| hsa-miR-29b-1  | NMI          | -0.983674494 |
| hsa-miR-552    | NMI          | -0.977980895 |
| hsa-miR-29b-1  | LOC100505483 | -0.968302074 |
| hsa-miR-338-3p | LOC100505483 | -0.949067753 |
| hsa-miR-552    | LOC100505483 | -0.93529956  |
| hsa-miR-224    | OAS3         | -0.910178617 |
| hsa-miR-29b-1  | OAS3         | -0.980794035 |

|                |              |              |
|----------------|--------------|--------------|
| hsa-miR-338-3p | OAS3         | -0.911038932 |
| hsa-miR-452    | OAS3         | -0.901276934 |
| hsa-miR-552    | OAS3         | -0.957104349 |
| hsa-miR-224    | IDH3G        | -0.934476284 |
| hsa-miR-29b-1  | IDH3G        | -0.98748179  |
| hsa-miR-338-3p | IDH3G        | -0.91898102  |
| hsa-miR-452    | IDH3G        | -0.912921629 |
| hsa-miR-552    | IDH3G        | -0.974284887 |
| hsa-miR-210    | BRCC3        | -0.907620659 |
| hsa-miR-505    | BRCC3        | -0.932704032 |
| hsa-miR-770-5p | BRCC3        | -0.918065782 |
| hsa-miR-29b-1  | HES6         | -0.904040212 |
| hsa-miR-224    | SPATA17      | -0.940189599 |
| hsa-miR-29b-1  | SPATA17      | -0.997236536 |
| hsa-miR-552    | SPATA17      | -0.981941085 |
| hsa-miR-224    | COL1A1       | -0.941791335 |
| hsa-miR-29b-1  | COL1A1       | -0.996929684 |
| hsa-miR-338-3p | COL1A1       | -0.915097416 |
| hsa-miR-552    | COL1A1       | -0.981797479 |
| hsa-miR-224    | MUC13        | -0.932315602 |
| hsa-miR-29b-1  | MUC13        | -0.965481276 |
| hsa-miR-338-3p | MUC13        | -0.919364139 |
| hsa-miR-552    | MUC13        | -0.953582647 |
| hsa-miR-215    | MCTP1        | -0.924277108 |
| hsa-miR-224    | MCTP1        | -0.91021011  |
| hsa-miR-29b-1  | MCTP1        | -0.943078495 |
| hsa-miR-338-3p | MCTP1        | -0.961794822 |
| hsa-miR-552    | MCTP1        | -0.92880634  |
| hsa-miR-224    | CXorf40A     | -0.933334926 |
| hsa-miR-29b-1  | CXorf40A     | -0.985924234 |
| hsa-miR-452    | CXorf40A     | -0.906140538 |
| hsa-miR-552    | CXorf40A     | -0.9832726   |
| hsa-miR-224    | PPM1K        | -0.937206075 |
| hsa-miR-29b-1  | PPM1K        | -0.990642633 |
| hsa-miR-338-3p | PPM1K        | -0.91788695  |
| hsa-miR-452    | PPM1K        | -0.902891005 |
| hsa-miR-552    | PPM1K        | -0.97537144  |
| hsa-miR-224    | LOC389831    | -0.943395721 |
| hsa-miR-29b-1  | LOC389831    | -0.981759802 |
| hsa-miR-338-3p | LOC389831    | -0.946556527 |
| hsa-miR-452    | LOC389831    | -0.913823201 |
| hsa-miR-552    | LOC389831    | -0.978453634 |
| hsa-miR-215    | LOC100129827 | -0.923361139 |
| hsa-miR-224    | LOC100129827 | -0.948648152 |

|                |              |              |
|----------------|--------------|--------------|
| hsa-miR-29b-1  | LOC100129827 | -0.968375007 |
| hsa-miR-338-3p | LOC100129827 | -0.964774864 |
| hsa-miR-452    | LOC100129827 | -0.924719002 |
| hsa-miR-552    | LOC100129827 | -0.973194907 |
| hsa-miR-224    | LOC400573    | -0.916961793 |
| hsa-miR-29b-1  | LOC400573    | -0.981398234 |
| hsa-miR-552    | LOC400573    | -0.972143594 |
| hsa-miR-29b-1  | CTSS         | -0.94007279  |
| hsa-miR-552    | CTSS         | -0.94155474  |
| hsa-miR-29b-1  | CXorf40B     | -0.901874429 |
| hsa-miR-224    | ERP27        | -0.923313323 |
| hsa-miR-29b-1  | ERP27        | -0.979206107 |
| hsa-miR-552    | ERP27        | -0.976175138 |
| hsa-miR-224    | EPHB2        | -0.903232567 |
| hsa-miR-29b-1  | EPHB2        | -0.975095601 |
| hsa-miR-552    | EPHB2        | -0.959150521 |
| hsa-miR-224    | SYT13        | -0.940575612 |
| hsa-miR-29b-1  | SYT13        | -0.996136947 |
| hsa-miR-338-3p | SYT13        | -0.919928783 |
| hsa-miR-552    | SYT13        | -0.982530838 |
| hsa-miR-215    | PSMB8        | -0.92961299  |
| hsa-miR-29b-1  | PSMB8        | -0.91965943  |
| hsa-miR-338-3p | PSMB8        | -0.959349086 |
| hsa-miR-552    | PSMB8        | -0.903229607 |
| hsa-miR-29b-1  | RARRES2      | -0.96697079  |
| hsa-miR-552    | RARRES2      | -0.941090589 |
| hsa-miR-224    | KLF12        | -0.941668353 |
| hsa-miR-29b-1  | KLF12        | -0.988528704 |
| hsa-miR-338-3p | KLF12        | -0.920312498 |
| hsa-miR-452    | KLF12        | -0.915659848 |
| hsa-miR-552    | KLF12        | -0.985311135 |
| hsa-miR-224    | CLEC3A       | -0.938608834 |
| hsa-miR-29b-1  | CLEC3A       | -0.98943147  |
| hsa-miR-452    | CLEC3A       | -0.907498367 |
| hsa-miR-552    | CLEC3A       | -0.982164672 |
| hsa-miR-224    | GPC4         | -0.952456924 |
| hsa-miR-29b-1  | GPC4         | -0.987869183 |
| hsa-miR-338-3p | GPC4         | -0.922619615 |
| hsa-miR-452    | GPC4         | -0.924313946 |
| hsa-miR-552    | GPC4         | -0.98577903  |
| hsa-miR-149    | IDS          | -0.916844496 |
| hsa-miR-210    | IDS          | -0.938821473 |
| hsa-miR-505    | IDS          | -0.946251433 |
| hsa-miR-770-5p | IDS          | -0.973119779 |

|                |           |              |
|----------------|-----------|--------------|
| hsa-miR-224    | FAM50A    | -0.929258671 |
| hsa-miR-29b-1  | FAM50A    | -0.987080177 |
| hsa-miR-452    | FAM50A    | -0.907769062 |
| hsa-miR-552    | FAM50A    | -0.979945963 |
| hsa-miR-215    | TMLHE     | -0.913817426 |
| hsa-miR-224    | TMLHE     | -0.926457203 |
| hsa-miR-29b-1  | TMLHE     | -0.967243849 |
| hsa-miR-338-3p | TMLHE     | -0.961633245 |
| hsa-miR-552    | TMLHE     | -0.955427842 |
| hsa-miR-224    | CD200     | -0.908476651 |
| hsa-miR-29b-1  | CD200     | -0.983084419 |
| hsa-miR-452    | CD200     | -0.903505451 |
| hsa-miR-552    | CD200     | -0.96625932  |
| hsa-miR-224    | ATP10B    | -0.936057146 |
| hsa-miR-29b-1  | ATP10B    | -0.983991451 |
| hsa-miR-338-3p | ATP10B    | -0.939755337 |
| hsa-miR-452    | ATP10B    | -0.901428027 |
| hsa-miR-552    | ATP10B    | -0.96861825  |
| hsa-miR-224    | PLD1      | -0.928202698 |
| hsa-miR-29b-1  | PLD1      | -0.994140345 |
| hsa-miR-552    | PLD1      | -0.980476553 |
| hsa-miR-224    | GDI1      | -0.952639339 |
| hsa-miR-29b-1  | GDI1      | -0.990266326 |
| hsa-miR-338-3p | GDI1      | -0.929163631 |
| hsa-miR-452    | GDI1      | -0.92681357  |
| hsa-miR-552    | GDI1      | -0.988586497 |
| hsa-miR-224    | DUSP5     | -0.934022545 |
| hsa-miR-29b-1  | DUSP5     | -0.993317626 |
| hsa-miR-452    | DUSP5     | -0.900516757 |
| hsa-miR-552    | DUSP5     | -0.982739859 |
| hsa-miR-224    | REPS2     | -0.903459237 |
| hsa-miR-29b-1  | REPS2     | -0.984364734 |
| hsa-miR-552    | REPS2     | -0.965598497 |
| hsa-miR-224    | IRAK1     | -0.906486291 |
| hsa-miR-29b-1  | IRAK1     | -0.982986008 |
| hsa-miR-552    | IRAK1     | -0.966183228 |
| hsa-miR-29b-1  | MYLK      | -0.92366805  |
| hsa-miR-552    | MYLK      | -0.920422765 |
| hsa-miR-224    | CLN8      | -0.967232516 |
| hsa-miR-29b-1  | CLN8      | -0.978633142 |
| hsa-miR-452    | CLN8      | -0.916481227 |
| hsa-miR-552    | CLN8      | -0.996038175 |
| hsa-miR-29b-1  | HIST1H2AC | -0.946889783 |
| hsa-miR-552    | HIST1H2AC | -0.949424086 |

|                |          |              |
|----------------|----------|--------------|
| hsa-miR-224    | HYLS1    | -0.937703881 |
| hsa-miR-29b-1  | HYLS1    | -0.993807166 |
| hsa-miR-338-3p | HYLS1    | -0.919324375 |
| hsa-miR-552    | HYLS1    | -0.974828535 |
| hsa-miR-149    | EDIL3    | -0.900257329 |
| hsa-miR-193b   | EDIL3    | -0.913720213 |
| hsa-miR-215    | TRIM29   | -0.910489054 |
| hsa-miR-224    | TRIM29   | -0.911501945 |
| hsa-miR-29b-1  | TRIM29   | -0.943589304 |
| hsa-miR-338-3p | TRIM29   | -0.955052544 |
| hsa-miR-552    | TRIM29   | -0.928128623 |
| hsa-miR-215    | SERPINH1 | -0.908835611 |
| hsa-miR-224    | SERPINH1 | -0.958034343 |
| hsa-miR-29b-1  | SERPINH1 | -0.960652369 |
| hsa-miR-338-3p | SERPINH1 | -0.955688926 |
| hsa-miR-452    | SERPINH1 | -0.934566101 |
| hsa-miR-552    | SERPINH1 | -0.971305985 |
| hsa-miR-224    | ARHGEF4  | -0.943862262 |
| hsa-miR-29b-1  | ARHGEF4  | -0.995987411 |
| hsa-miR-552    | ARHGEF4  | -0.987793369 |
| hsa-miR-224    | FUNDC2   | -0.928134103 |
| hsa-miR-29b-1  | FUNDC2   | -0.976799896 |
| hsa-miR-338-3p | FUNDC2   | -0.948979387 |
| hsa-miR-552    | FUNDC2   | -0.962857818 |
| hsa-miR-224    | RARRES3  | -0.914560636 |
| hsa-miR-29b-1  | RARRES3  | -0.975603748 |
| hsa-miR-338-3p | RARRES3  | -0.907173624 |
| hsa-miR-552    | RARRES3  | -0.959053681 |
| hsa-miR-224    | IFIT3    | -0.942368444 |
| hsa-miR-29b-1  | IFIT3    | -0.98999884  |
| hsa-miR-338-3p | IFIT3    | -0.938755615 |
| hsa-miR-452    | IFIT3    | -0.924210848 |
| hsa-miR-552    | IFIT3    | -0.982274271 |
| hsa-miR-224    | ENPP5    | -0.957145816 |
| hsa-miR-29b-1  | ENPP5    | -0.984658265 |
| hsa-miR-338-3p | ENPP5    | -0.913585148 |
| hsa-miR-452    | ENPP5    | -0.902908737 |
| hsa-miR-552    | ENPP5    | -0.981485585 |
| hsa-miR-215    | CAV1     | -0.913127548 |
| hsa-miR-224    | CAV1     | -0.923368174 |
| hsa-miR-29b-1  | CAV1     | -0.962752152 |
| hsa-miR-338-3p | CAV1     | -0.967077138 |
| hsa-miR-552    | CAV1     | -0.950050892 |
| hsa-miR-224    | BLMH     | -0.907114122 |

|                |          |              |
|----------------|----------|--------------|
| hsa-miR-29b-1  | BLMH     | -0.990725432 |
| hsa-miR-552    | BLMH     | -0.967387926 |
| hsa-miR-224    | MSH3     | -0.934462594 |
| hsa-miR-29b-1  | MSH3     | -0.998120414 |
| hsa-miR-552    | MSH3     | -0.982117431 |
| hsa-miR-224    | FAM55C   | -0.967340746 |
| hsa-miR-29b-1  | FAM55C   | -0.984198941 |
| hsa-miR-552    | FAM55C   | -0.987807074 |
| hsa-miR-224    | TACR3    | -0.943080792 |
| hsa-miR-29b-1  | TACR3    | -0.977659617 |
| hsa-miR-338-3p | TACR3    | -0.931056752 |
| hsa-miR-552    | TACR3    | -0.97419115  |
| hsa-miR-224    | IFITM3   | -0.918716074 |
| hsa-miR-29b-1  | IFITM3   | -0.971534135 |
| hsa-miR-338-3p | IFITM3   | -0.919866278 |
| hsa-miR-552    | IFITM3   | -0.946506414 |
| hsa-miR-215    | PPP1R1B  | -0.937795929 |
| hsa-miR-29b-1  | PPP1R1B  | -0.915617501 |
| hsa-miR-338-3p | PPP1R1B  | -0.94804682  |
| hsa-miR-552    | PPP1R1B  | -0.905151305 |
| hsa-miR-29b-1  | DGAT2    | -0.968549623 |
| hsa-miR-552    | DGAT2    | -0.939479677 |
| hsa-miR-215    | DNAH5    | -0.910622492 |
| hsa-miR-29b-1  | DNAH5    | -0.942780633 |
| hsa-miR-338-3p | DNAH5    | -0.951206748 |
| hsa-miR-552    | DNAH5    | -0.919187497 |
| hsa-miR-224    | SPATA22  | -0.912592717 |
| hsa-miR-29b-1  | SPATA22  | -0.955275578 |
| hsa-miR-338-3p | SPATA22  | -0.91808191  |
| hsa-miR-552    | SPATA22  | -0.93752609  |
| hsa-miR-224    | WDR54    | -0.907032683 |
| hsa-miR-29b-1  | WDR54    | -0.994591728 |
| hsa-miR-552    | WDR54    | -0.966044466 |
| hsa-miR-224    | UBE2L6   | -0.951443121 |
| hsa-miR-29b-1  | UBE2L6   | -0.978563905 |
| hsa-miR-338-3p | UBE2L6   | -0.914441774 |
| hsa-miR-452    | UBE2L6   | -0.906246334 |
| hsa-miR-552    | UBE2L6   | -0.975262557 |
| hsa-miR-224    | C13orf15 | -0.903963988 |
| hsa-miR-29b-1  | C13orf15 | -0.954914164 |
| hsa-miR-552    | C13orf15 | -0.944272968 |
| hsa-miR-224    | C4orf47  | -0.901467677 |
| hsa-miR-29b-1  | C4orf47  | -0.968327766 |
| hsa-miR-338-3p | C4orf47  | -0.951197281 |

|                |          |              |
|----------------|----------|--------------|
| hsa-miR-552    | C4orf47  | -0.944137442 |
| hsa-miR-29b-1  | ATHL1    | -0.95176772  |
| hsa-miR-552    | ATHL1    | -0.930505214 |
| hsa-miR-29b-1  | ALDH1A3  | -0.971032729 |
| hsa-miR-338-3p | ALDH1A3  | -0.936019876 |
| hsa-miR-552    | ALDH1A3  | -0.939291839 |
| hsa-miR-224    | HPN      | -0.941095278 |
| hsa-miR-29b-1  | HPN      | -0.982609096 |
| hsa-miR-338-3p | HPN      | -0.942106519 |
| hsa-miR-452    | HPN      | -0.913931844 |
| hsa-miR-552    | HPN      | -0.972403671 |
| hsa-miR-224    | SESN1    | -0.955064449 |
| hsa-miR-29b-1  | SESN1    | -0.982193135 |
| hsa-miR-338-3p | SESN1    | -0.935050908 |
| hsa-miR-452    | SESN1    | -0.944431939 |
| hsa-miR-552    | SESN1    | -0.990113143 |
| hsa-miR-224    | SSR4     | -0.960888963 |
| hsa-miR-29b-1  | SSR4     | -0.987263411 |
| hsa-miR-552    | SSR4     | -0.992883779 |
| hsa-miR-224    | ZCCHC24  | -0.901293104 |
| hsa-miR-29b-1  | ZCCHC24  | -0.949930355 |
| hsa-miR-552    | ZCCHC24  | -0.93164467  |
| hsa-miR-29b-1  | CSRNP3   | -0.95703179  |
| hsa-miR-452    | CSRNP3   | -0.900754618 |
| hsa-miR-552    | CSRNP3   | -0.938417897 |
| hsa-miR-224    | ZNF302   | -0.946304831 |
| hsa-miR-29b-1  | ZNF302   | -0.988674727 |
| hsa-miR-338-3p | ZNF302   | -0.935797568 |
| hsa-miR-552    | ZNF302   | -0.979569427 |
| hsa-miR-215    | ARHGAP24 | -0.93178427  |
| hsa-miR-224    | ARHGAP24 | -0.950145037 |
| hsa-miR-29b-1  | ARHGAP24 | -0.961540641 |
| hsa-miR-338-3p | ARHGAP24 | -0.956833512 |
| hsa-miR-552    | ARHGAP24 | -0.964987501 |
| hsa-miR-29b-1  | TUBAL3   | -0.973066448 |
| hsa-miR-552    | TUBAL3   | -0.946048674 |
| hsa-miR-215    | CYP1B1   | -0.911402734 |
| hsa-miR-224    | CYP1B1   | -0.901401465 |
| hsa-miR-29b-1  | CYP1B1   | -0.943315017 |
| hsa-miR-338-3p | CYP1B1   | -0.955489018 |
| hsa-miR-552    | CYP1B1   | -0.922469004 |
| hsa-miR-224    | FMR1     | -0.911428799 |
| hsa-miR-29b-1  | FMR1     | -0.972068457 |
| hsa-miR-552    | FMR1     | -0.968100511 |

|                |          |              |
|----------------|----------|--------------|
| hsa-miR-224    | AMPD3    | -0.945941542 |
| hsa-miR-29b-1  | AMPD3    | -0.991404048 |
| hsa-miR-338-3p | AMPD3    | -0.91331136  |
| hsa-miR-452    | AMPD3    | -0.910775361 |
| hsa-miR-552    | AMPD3    | -0.988043023 |
| hsa-miR-29b-1  | RSAD2    | -0.932626331 |
| hsa-miR-338-3p | RSAD2    | -0.907554859 |
| hsa-miR-552    | RSAD2    | -0.900200741 |
| hsa-miR-224    | NDRG1    | -0.912437064 |
| hsa-miR-29b-1  | NDRG1    | -0.992894604 |
| hsa-miR-552    | NDRG1    | -0.964384224 |
| hsa-miR-149    | ASAP1    | -0.95020679  |
| hsa-miR-193b   | ASAP1    | -0.950554298 |
| hsa-miR-210    | ASAP1    | -0.95495566  |
| hsa-miR-505    | ASAP1    | -0.949348032 |
| hsa-miR-770-5p | ASAP1    | -0.977499034 |
| hsa-miR-215    | HAUS7    | -0.925733881 |
| hsa-miR-224    | HAUS7    | -0.932800152 |
| hsa-miR-29b-1  | HAUS7    | -0.951901622 |
| hsa-miR-338-3p | HAUS7    | -0.954593302 |
| hsa-miR-552    | HAUS7    | -0.945740501 |
| hsa-miR-224    | PARP12   | -0.927719703 |
| hsa-miR-29b-1  | PARP12   | -0.969948253 |
| hsa-miR-338-3p | PARP12   | -0.95461278  |
| hsa-miR-452    | PARP12   | -0.90084404  |
| hsa-miR-552    | PARP12   | -0.955314459 |
| hsa-miR-224    | PPP1R14C | -0.930632338 |
| hsa-miR-29b-1  | PPP1R14C | -0.988999044 |
| hsa-miR-338-3p | PPP1R14C | -0.911709412 |
| hsa-miR-452    | PPP1R14C | -0.924055196 |
| hsa-miR-552    | PPP1R14C | -0.979615459 |
| hsa-miR-224    | CMBL     | -0.919014713 |
| hsa-miR-29b-1  | CMBL     | -0.987443999 |
| hsa-miR-338-3p | CMBL     | -0.925503248 |
| hsa-miR-452    | CMBL     | -0.915104303 |
| hsa-miR-552    | CMBL     | -0.967858372 |
| hsa-miR-29b-1  | MTUS1    | -0.93345934  |
| hsa-miR-338-3p | MTUS1    | -0.966774621 |
| hsa-miR-452    | MTUS1    | -0.930921396 |
| hsa-miR-552    | MTUS1    | -0.915671685 |
| hsa-miR-224    | ANKRD50  | -0.934085902 |
| hsa-miR-29b-1  | ANKRD50  | -0.98238087  |
| hsa-miR-552    | ANKRD50  | -0.982395639 |
| hsa-miR-224    | TAP2     | -0.924382652 |



|                |         |              |
|----------------|---------|--------------|
| hsa-miR-29b-1  | TAP2    | -0.99739019  |
| hsa-miR-552    | TAP2    | -0.975259215 |
| hsa-miR-29b-1  | BCAP31  | -0.947990584 |
| hsa-miR-338-3p | BCAP31  | -0.91967494  |
| hsa-miR-552    | BCAP31  | -0.92017811  |
| hsa-miR-224    | NETO2   | -0.907314803 |
| hsa-miR-29b-1  | NETO2   | -0.930525105 |
| hsa-miR-552    | NETO2   | -0.948884825 |
| hsa-miR-224    | AGPAT5  | -0.945112951 |
| hsa-miR-29b-1  | AGPAT5  | -0.987330417 |
| hsa-miR-338-3p | AGPAT5  | -0.921801131 |
| hsa-miR-452    | AGPAT5  | -0.924561683 |
| hsa-miR-552    | AGPAT5  | -0.987507636 |
| hsa-miR-149    | TMPRSS2 | -0.918047257 |
| hsa-miR-210    | TMPRSS2 | -0.921776724 |
| hsa-miR-365    | TMPRSS2 | -0.90630225  |
| hsa-miR-505    | TMPRSS2 | -0.913978402 |
| hsa-miR-770-5p | TMPRSS2 | -0.948948307 |
| hsa-miR-224    | FDFT1   | -0.919494834 |
| hsa-miR-29b-1  | FDFT1   | -0.986055759 |
| hsa-miR-338-3p | FDFT1   | -0.944429561 |
| hsa-miR-552    | FDFT1   | -0.962047364 |
| hsa-miR-149    | KCNE3   | -0.919914725 |
| hsa-miR-193b   | KCNE3   | -0.913279622 |
| hsa-miR-210    | KCNE3   | -0.930912108 |
| hsa-miR-505    | KCNE3   | -0.946182149 |
| hsa-miR-770-5p | KCNE3   | -0.935053916 |
| hsa-miR-224    | ACTN4   | -0.912529819 |
| hsa-miR-29b-1  | ACTN4   | -0.992119885 |
| hsa-miR-338-3p | ACTN4   | -0.911327148 |
| hsa-miR-552    | ACTN4   | -0.96175168  |
| hsa-miR-224    | LAGE3   | -0.959434908 |
| hsa-miR-29b-1  | LAGE3   | -0.991910679 |
| hsa-miR-338-3p | LAGE3   | -0.916328679 |
| hsa-miR-452    | LAGE3   | -0.915905714 |
| hsa-miR-552    | LAGE3   | -0.99136345  |
| hsa-miR-29b-1  | ELFN2   | -0.931385178 |
| hsa-miR-338-3p | ELFN2   | -0.943315204 |
| hsa-miR-552    | ELFN2   | -0.906702633 |
| hsa-miR-215    | MLF1    | -0.913240321 |
| hsa-miR-29b-1  | MLF1    | -0.931805764 |
| hsa-miR-338-3p | MLF1    | -0.948251884 |
| hsa-miR-552    | MLF1    | -0.90668768  |
| hsa-miR-224    | MBIP    | -0.912968316 |

|                |         |              |
|----------------|---------|--------------|
| hsa-miR-29b-1  | MBIP    | -0.989596872 |
| hsa-miR-552    | MBIP    | -0.971017984 |
| hsa-miR-29b-1  | CRIP2   | -0.95906866  |
| hsa-miR-552    | CRIP2   | -0.943117678 |
| hsa-miR-224    | OSGIN2  | -0.948372594 |
| hsa-miR-29b-1  | OSGIN2  | -0.991925438 |
| hsa-miR-552    | OSGIN2  | -0.984385245 |
| hsa-miR-224    | SUCNR1  | -0.911479917 |
| hsa-miR-29b-1  | SUCNR1  | -0.972537218 |
| hsa-miR-552    | SUCNR1  | -0.962629722 |
| hsa-miR-29b-1  | YBX2    | -0.932092701 |
| hsa-miR-338-3p | YBX2    | -0.903628262 |
| hsa-miR-552    | YBX2    | -0.906179471 |
| hsa-miR-149    | PPP2R3A | -0.934454028 |
| hsa-miR-193b   | PPP2R3A | -0.923763937 |
| hsa-miR-210    | PPP2R3A | -0.940912596 |
| hsa-miR-365    | PPP2R3A | -0.907588412 |
| hsa-miR-505    | PPP2R3A | -0.947963654 |
| hsa-miR-770-5p | PPP2R3A | -0.943943599 |
| hsa-miR-224    | DKK1    | -0.938112652 |
| hsa-miR-29b-1  | DKK1    | -0.997742099 |
| hsa-miR-338-3p | DKK1    | -0.910477908 |
| hsa-miR-552    | DKK1    | -0.981779139 |
| hsa-miR-224    | DHRS2   | -0.95159736  |
| hsa-miR-29b-1  | DHRS2   | -0.993694733 |
| hsa-miR-552    | DHRS2   | -0.990557843 |
| hsa-miR-29b-1  | CASP2   | -0.902847557 |
| hsa-miR-215    | CDH1    | -0.910176427 |
| hsa-miR-29b-1  | CDH1    | -0.939313405 |
| hsa-miR-338-3p | CDH1    | -0.945193681 |
| hsa-miR-552    | CDH1    | -0.919614876 |
| hsa-miR-224    | PIGZ    | -0.93707036  |
| hsa-miR-29b-1  | PIGZ    | -0.994646513 |
| hsa-miR-552    | PIGZ    | -0.981611061 |
| hsa-miR-224    | RARRES1 | -0.948894346 |
| hsa-miR-29b-1  | RARRES1 | -0.992852537 |
| hsa-miR-552    | RARRES1 | -0.986772256 |
| hsa-miR-224    | DCDC5   | -0.924772744 |
| hsa-miR-29b-1  | DCDC5   | -0.988098256 |
| hsa-miR-552    | DCDC5   | -0.979133117 |
| hsa-miR-224    | AGT     | -0.918907327 |
| hsa-miR-29b-1  | AGT     | -0.964300736 |
| hsa-miR-338-3p | AGT     | -0.924174399 |
| hsa-miR-552    | AGT     | -0.948914155 |

|                |            |              |
|----------------|------------|--------------|
| hsa-miR-224    | SEMA4G     | -0.908552969 |
| hsa-miR-29b-1  | SEMA4G     | -0.980143185 |
| hsa-miR-552    | SEMA4G     | -0.951220147 |
| hsa-miR-29b-1  | NHSL1      | -0.928516458 |
| hsa-miR-552    | NHSL1      | -0.914579304 |
| hsa-miR-224    | RASSF8     | -0.943466116 |
| hsa-miR-29b-1  | RASSF8     | -0.990929338 |
| hsa-miR-338-3p | RASSF8     | -0.918523995 |
| hsa-miR-452    | RASSF8     | -0.920718988 |
| hsa-miR-552    | RASSF8     | -0.983548587 |
| hsa-miR-224    | LOC283352  | -0.929915399 |
| hsa-miR-29b-1  | LOC283352  | -0.985398626 |
| hsa-miR-338-3p | LOC283352  | -0.941747667 |
| hsa-miR-452    | LOC283352  | -0.907113242 |
| hsa-miR-552    | LOC283352  | -0.973374829 |
| hsa-miR-224    | GABRE      | -0.923521044 |
| hsa-miR-29b-1  | GABRE      | -0.990789034 |
| hsa-miR-552    | GABRE      | -0.975408022 |
| hsa-miR-149    | LARP6      | -0.940536678 |
| hsa-miR-193b   | LARP6      | -0.935073374 |
| hsa-miR-210    | LARP6      | -0.934308672 |
| hsa-miR-505    | LARP6      | -0.924458961 |
| hsa-miR-770-5p | LARP6      | -0.934085826 |
| hsa-miR-29b-1  | BCL2L15    | -0.961984136 |
| hsa-miR-552    | BCL2L15    | -0.934845994 |
| hsa-miR-224    | ALDH1A1    | -0.917844223 |
| hsa-miR-29b-1  | ALDH1A1    | -0.957712829 |
| hsa-miR-452    | ALDH1A1    | -0.916067276 |
| hsa-miR-552    | ALDH1A1    | -0.954141307 |
| hsa-miR-29b-1  | POLL       | -0.954842503 |
| hsa-miR-552    | POLL       | -0.946044999 |
| hsa-miR-215    | NCRNA00103 | -0.949139586 |
| hsa-miR-224    | NCRNA00103 | -0.951351799 |
| hsa-miR-29b-1  | NCRNA00103 | -0.943208641 |
| hsa-miR-338-3p | NCRNA00103 | -0.955874417 |
| hsa-miR-552    | NCRNA00103 | -0.95499175  |
| hsa-miR-224    | RNF170     | -0.945164694 |
| hsa-miR-29b-1  | RNF170     | -0.984392306 |
| hsa-miR-338-3p | RNF170     | -0.940277981 |
| hsa-miR-452    | RNF170     | -0.91524654  |
| hsa-miR-552    | RNF170     | -0.981837827 |
| hsa-miR-224    | SEPW1      | -0.940659059 |
| hsa-miR-29b-1  | SEPW1      | -0.991695097 |
| hsa-miR-338-3p | SEPW1      | -0.93132264  |

|                |              |              |
|----------------|--------------|--------------|
| hsa-miR-452    | SEPW1        | -0.908750502 |
| hsa-miR-552    | SEPW1        | -0.978392803 |
| hsa-miR-224    | SNAI3        | -0.941771049 |
| hsa-miR-29b-1  | SNAI3        | -0.989484815 |
| hsa-miR-338-3p | SNAI3        | -0.932381151 |
| hsa-miR-552    | SNAI3        | -0.974390122 |
| hsa-miR-224    | MACROD2      | -0.932298611 |
| hsa-miR-29b-1  | MACROD2      | -0.992459823 |
| hsa-miR-452    | MACROD2      | -0.906345333 |
| hsa-miR-552    | MACROD2      | -0.982566907 |
| hsa-miR-224    | NEBL         | -0.940942625 |
| hsa-miR-29b-1  | NEBL         | -0.981921558 |
| hsa-miR-338-3p | NEBL         | -0.953086668 |
| hsa-miR-452    | NEBL         | -0.911704543 |
| hsa-miR-552    | NEBL         | -0.974508652 |
| hsa-miR-224    | LOC100506844 | -0.961199996 |
| hsa-miR-29b-1  | LOC100506844 | -0.980007679 |
| hsa-miR-338-3p | LOC100506844 | -0.927023881 |
| hsa-miR-452    | LOC100506844 | -0.923271584 |
| hsa-miR-552    | LOC100506844 | -0.991114931 |
| hsa-miR-224    | ENO2         | -0.956423777 |
| hsa-miR-29b-1  | ENO2         | -0.992797303 |
| hsa-miR-338-3p | ENO2         | -0.92167991  |
| hsa-miR-452    | ENO2         | -0.915577794 |
| hsa-miR-552    | ENO2         | -0.99015449  |
| hsa-miR-224    | VAMP7        | -0.919804095 |
| hsa-miR-29b-1  | VAMP7        | -0.96613289  |
| hsa-miR-452    | VAMP7        | -0.909149791 |
| hsa-miR-552    | VAMP7        | -0.969546558 |
| hsa-miR-770-5p | CTSB         | -0.94285435  |
| hsa-miR-149    | SMARCA1      | -0.909546497 |
| hsa-miR-210    | SMARCA1      | -0.92294336  |
| hsa-miR-505    | SMARCA1      | -0.927756485 |
| hsa-miR-770-5p | SMARCA1      | -0.979461959 |
| hsa-miR-224    | C7orf29      | -0.923690656 |
| hsa-miR-29b-1  | C7orf29      | -0.974610647 |
| hsa-miR-338-3p | C7orf29      | -0.927424474 |
| hsa-miR-552    | C7orf29      | -0.95163833  |
| hsa-miR-29b-1  | LOC439911    | -0.936635472 |
| hsa-miR-552    | LOC439911    | -0.907757821 |
| hsa-miR-224    | HOXA11-AS    | -0.941096666 |
| hsa-miR-29b-1  | HOXA11-AS    | -0.996839911 |
| hsa-miR-552    | HOXA11-AS    | -0.98550044  |
| hsa-miR-215    | ZC3H12C      | -0.927148248 |

|                |           |              |
|----------------|-----------|--------------|
| hsa-miR-224    | ZC3H12C   | -0.953186946 |
| hsa-miR-29b-1  | ZC3H12C   | -0.962977858 |
| hsa-miR-338-3p | ZC3H12C   | -0.947911349 |
| hsa-miR-552    | ZC3H12C   | -0.966094868 |
| hsa-miR-215    | ALDH3A1   | -0.919930434 |
| hsa-miR-29b-1  | ALDH3A1   | -0.919269672 |
| hsa-miR-338-3p | ALDH3A1   | -0.957836416 |
| hsa-miR-224    | FOXJ1     | -0.927218351 |
| hsa-miR-29b-1  | FOXJ1     | -0.995372293 |
| hsa-miR-552    | FOXJ1     | -0.977830848 |
| hsa-miR-215    | LGR5      | -0.94002012  |
| hsa-miR-224    | LGR5      | -0.953335117 |
| hsa-miR-29b-1  | LGR5      | -0.951433297 |
| hsa-miR-338-3p | LGR5      | -0.963566184 |
| hsa-miR-452    | LGR5      | -0.910568734 |
| hsa-miR-552    | LGR5      | -0.96091864  |
| hsa-miR-224    | ATP11C    | -0.918234605 |
| hsa-miR-29b-1  | ATP11C    | -0.998095852 |
| hsa-miR-552    | ATP11C    | -0.969512748 |
| hsa-miR-215    | MYB       | -0.911462105 |
| hsa-miR-224    | MYB       | -0.907327731 |
| hsa-miR-29b-1  | MYB       | -0.943110967 |
| hsa-miR-338-3p | MYB       | -0.956892439 |
| hsa-miR-552    | MYB       | -0.925764547 |
| hsa-miR-224    | ZDHHC4    | -0.924601637 |
| hsa-miR-29b-1  | ZDHHC4    | -0.989953135 |
| hsa-miR-338-3p | ZDHHC4    | -0.908024035 |
| hsa-miR-452    | ZDHHC4    | -0.918069409 |
| hsa-miR-552    | ZDHHC4    | -0.977972467 |
| hsa-miR-224    | DPY19L2P2 | -0.907373139 |
| hsa-miR-29b-1  | DPY19L2P2 | -0.986071123 |
| hsa-miR-552    | DPY19L2P2 | -0.966064105 |
| hsa-miR-29b-1  | ERN2      | -0.972339116 |
| hsa-miR-338-3p | ERN2      | -0.938617923 |
| hsa-miR-452    | ERN2      | -0.901162925 |
| hsa-miR-552    | ERN2      | -0.940182904 |
| hsa-miR-224    | TM4SF4    | -0.927892507 |
| hsa-miR-29b-1  | TM4SF4    | -0.96898711  |
| hsa-miR-338-3p | TM4SF4    | -0.952417417 |
| hsa-miR-452    | TM4SF4    | -0.902712087 |
| hsa-miR-552    | TM4SF4    | -0.954992656 |
| hsa-miR-224    | ITGA1     | -0.946240284 |
| hsa-miR-29b-1  | ITGA1     | -0.995451181 |
| hsa-miR-338-3p | ITGA1     | -0.921778919 |

|                |              |              |
|----------------|--------------|--------------|
| hsa-miR-552    | ITGA1        | -0.984158318 |
| hsa-miR-224    | IL1F7        | -0.951944836 |
| hsa-miR-29b-1  | IL1F7        | -0.988529639 |
| hsa-miR-338-3p | IL1F7        | -0.935700465 |
| hsa-miR-452    | IL1F7        | -0.930817376 |
| hsa-miR-552    | IL1F7        | -0.987691552 |
| hsa-miR-215    | NEK11        | -0.944990448 |
| hsa-miR-224    | NEK11        | -0.933388592 |
| hsa-miR-29b-1  | NEK11        | -0.936170103 |
| hsa-miR-338-3p | NEK11        | -0.960566415 |
| hsa-miR-552    | NEK11        | -0.938769707 |
| hsa-miR-149    | PSD3         | -0.92162662  |
| hsa-miR-193b   | PSD3         | -0.913665944 |
| hsa-miR-210    | PSD3         | -0.929703592 |
| hsa-miR-505    | PSD3         | -0.93485035  |
| hsa-miR-770-5p | PSD3         | -0.963298402 |
| hsa-miR-29b-1  | LOC100287628 | -0.974604004 |
| hsa-miR-552    | LOC100287628 | -0.956602434 |
| hsa-miR-29b-1  | OAS1         | -0.945862458 |
| hsa-miR-552    | OAS1         | -0.927272359 |
| hsa-miR-29b-1  | SFXN3        | -0.922932656 |
| hsa-miR-338-3p | SFXN3        | -0.96356543  |
| hsa-miR-552    | SFXN3        | -0.903535234 |
| hsa-miR-365    | DAB2         | -0.940165281 |
| hsa-miR-29b-1  | LGALS2       | -0.926912404 |
| hsa-miR-338-3p | LGALS2       | -0.936234822 |
| hsa-miR-552    | LGALS2       | -0.909348777 |
| hsa-miR-224    | SLC1A1       | -0.95155427  |
| hsa-miR-29b-1  | SLC1A1       | -0.985476797 |
| hsa-miR-338-3p | SLC1A1       | -0.923537897 |
| hsa-miR-452    | SLC1A1       | -0.906829719 |
| hsa-miR-552    | SLC1A1       | -0.986447006 |
| hsa-miR-215    | EPSTI1       | -0.927896174 |
| hsa-miR-224    | EPSTI1       | -0.913631242 |
| hsa-miR-29b-1  | EPSTI1       | -0.944025023 |
| hsa-miR-338-3p | EPSTI1       | -0.969264825 |
| hsa-miR-552    | EPSTI1       | -0.932874384 |
| hsa-miR-29b-1  | HOXA2        | -0.968572523 |
| hsa-miR-552    | HOXA2        | -0.939047424 |
| hsa-miR-224    | ITGA9        | -0.900764038 |
| hsa-miR-29b-1  | ITGA9        | -0.995825981 |
| hsa-miR-552    | ITGA9        | -0.963032387 |
| hsa-miR-224    | TCEAL4       | -0.921739122 |
| hsa-miR-29b-1  | TCEAL4       | -0.979578695 |

|                |              |              |
|----------------|--------------|--------------|
| hsa-miR-452    | TCEAL4       | -0.902837928 |
| hsa-miR-552    | TCEAL4       | -0.964903117 |
| hsa-miR-215    | PAG1         | -0.929624375 |
| hsa-miR-224    | PAG1         | -0.936257646 |
| hsa-miR-29b-1  | PAG1         | -0.948642019 |
| hsa-miR-338-3p | PAG1         | -0.971340991 |
| hsa-miR-452    | PAG1         | -0.914913848 |
| hsa-miR-552    | PAG1         | -0.95009311  |
| hsa-miR-224    | SLC25A45     | -0.906644895 |
| hsa-miR-29b-1  | SLC25A45     | -0.987740651 |
| hsa-miR-552    | SLC25A45     | -0.962808823 |
| hsa-miR-224    | REPIN1       | -0.930059536 |
| hsa-miR-29b-1  | REPIN1       | -0.994008293 |
| hsa-miR-452    | REPIN1       | -0.904387518 |
| hsa-miR-552    | REPIN1       | -0.980612226 |
| hsa-miR-224    | KLF15        | -0.928438743 |
| hsa-miR-29b-1  | KLF15        | -0.991749851 |
| hsa-miR-338-3p | KLF15        | -0.911811292 |
| hsa-miR-452    | KLF15        | -0.909755436 |
| hsa-miR-552    | KLF15        | -0.975161097 |
| hsa-miR-149    | PCGF5        | -0.935989171 |
| hsa-miR-193b   | PCGF5        | -0.946913051 |
| hsa-miR-210    | PCGF5        | -0.928430172 |
| hsa-miR-505    | PCGF5        | -0.933600459 |
| hsa-miR-224    | IRF9         | -0.931709253 |
| hsa-miR-29b-1  | IRF9         | -0.978983615 |
| hsa-miR-338-3p | IRF9         | -0.939213166 |
| hsa-miR-552    | IRF9         | -0.967398282 |
| hsa-miR-29b-1  | FAM85A       | -0.908873625 |
| hsa-miR-552    | FAM85A       | -0.901697994 |
| hsa-miR-224    | ITPKA        | -0.929721741 |
| hsa-miR-29b-1  | ITPKA        | -0.968799657 |
| hsa-miR-338-3p | ITPKA        | -0.906041045 |
| hsa-miR-452    | ITPKA        | -0.922374423 |
| hsa-miR-552    | ITPKA        | -0.964265845 |
| hsa-miR-29b-1  | ATP6AP1      | -0.962470448 |
| hsa-miR-552    | ATP6AP1      | -0.934138587 |
| hsa-miR-224    | DNAJC18      | -0.920832895 |
| hsa-miR-29b-1  | DNAJC18      | -0.969751177 |
| hsa-miR-338-3p | DNAJC18      | -0.94003036  |
| hsa-miR-552    | DNAJC18      | -0.950775704 |
| hsa-miR-224    | LOC100505609 | -0.94384845  |
| hsa-miR-29b-1  | LOC100505609 | -0.979745018 |
| hsa-miR-338-3p | LOC100505609 | -0.901182834 |

|                |              |              |
|----------------|--------------|--------------|
| hsa-miR-452    | LOC100505609 | -0.937074437 |
| hsa-miR-552    | LOC100505609 | -0.984934197 |
| hsa-miR-224    | KCNMB4       | -0.930650207 |
| hsa-miR-29b-1  | KCNMB4       | -0.97738578  |
| hsa-miR-338-3p | KCNMB4       | -0.927757745 |
| hsa-miR-452    | KCNMB4       | -0.913950199 |
| hsa-miR-552    | KCNMB4       | -0.965053464 |
| hsa-miR-224    | KRT17        | -0.915018907 |
| hsa-miR-29b-1  | KRT17        | -0.997572237 |
| hsa-miR-338-3p | KRT17        | -0.903231125 |
| hsa-miR-552    | KRT17        | -0.967046885 |
| hsa-miR-224    | CTGF         | -0.92041723  |
| hsa-miR-29b-1  | CTGF         | -0.980191296 |
| hsa-miR-338-3p | CTGF         | -0.942429655 |
| hsa-miR-552    | CTGF         | -0.956099943 |
| hsa-miR-29b-1  | SP140L       | -0.960936789 |
| hsa-miR-552    | SP140L       | -0.918003917 |
| hsa-miR-29b-1  | UBL4A        | -0.905697339 |
| hsa-miR-29b-1  | TMEM185A     | -0.93625976  |
| hsa-miR-552    | TMEM185A     | -0.91654786  |
| hsa-miR-29b-1  | ERLIN2       | -0.972897832 |
| hsa-miR-552    | ERLIN2       | -0.942087375 |
| hsa-miR-149    | HLA-F        | -0.925030066 |
| hsa-miR-193b   | HLA-F        | -0.931984916 |
| hsa-miR-210    | HLA-F        | -0.92529902  |
| hsa-miR-505    | HLA-F        | -0.930592968 |
| hsa-miR-770-5p | HLA-F        | -0.932511453 |
| hsa-miR-29b-1  | MFAP3L       | -0.961260102 |
| hsa-miR-552    | MFAP3L       | -0.939418623 |
| hsa-miR-29b-1  | CD37         | -0.929953446 |
| hsa-miR-552    | CD37         | -0.91267758  |
| hsa-miR-224    | ASRGL1       | -0.906654325 |
| hsa-miR-29b-1  | ASRGL1       | -0.989901925 |
| hsa-miR-552    | ASRGL1       | -0.967381295 |
| hsa-miR-224    | SCML4        | -0.935239789 |
| hsa-miR-29b-1  | SCML4        | -0.991357888 |
| hsa-miR-338-3p | SCML4        | -0.911083684 |
| hsa-miR-452    | SCML4        | -0.909000955 |
| hsa-miR-552    | SCML4        | -0.977505064 |
| hsa-miR-224    | TNFRSF10D    | -0.949510864 |
| hsa-miR-29b-1  | TNFRSF10D    | -0.993159188 |
| hsa-miR-552    | TNFRSF10D    | -0.987223839 |
| hsa-miR-224    | FBXL17       | -0.907862431 |
| hsa-miR-29b-1  | FBXL17       | -0.962511508 |



|                |         |              |
|----------------|---------|--------------|
| hsa-miR-338-3p | FBXL17  | -0.940718288 |
| hsa-miR-552    | FBXL17  | -0.93785538  |
| hsa-miR-224    | ZNF609  | -0.929532962 |
| hsa-miR-29b-1  | ZNF609  | -0.97136424  |
| hsa-miR-338-3p | ZNF609  | -0.944460229 |
| hsa-miR-552    | ZNF609  | -0.954708302 |
| hsa-miR-224    | CEACAM1 | -0.930852107 |
| hsa-miR-29b-1  | CEACAM1 | -0.993433574 |
| hsa-miR-552    | CEACAM1 | -0.982259705 |
| hsa-miR-224    | SNTB1   | -0.946387854 |
| hsa-miR-29b-1  | SNTB1   | -0.984242386 |
| hsa-miR-338-3p | SNTB1   | -0.942066887 |
| hsa-miR-452    | SNTB1   | -0.905910211 |
| hsa-miR-552    | SNTB1   | -0.979414991 |
| hsa-miR-215    | ISG15   | -0.932018649 |
| hsa-miR-224    | ISG15   | -0.903357614 |
| hsa-miR-29b-1  | ISG15   | -0.925281186 |
| hsa-miR-338-3p | ISG15   | -0.944014927 |
| hsa-miR-552    | ISG15   | -0.925232233 |
| hsa-miR-215    | SOX8    | -0.915040131 |
| hsa-miR-224    | SOX8    | -0.900485665 |
| hsa-miR-29b-1  | SOX8    | -0.94701627  |
| hsa-miR-338-3p | SOX8    | -0.950108524 |
| hsa-miR-552    | SOX8    | -0.927541231 |
| hsa-miR-224    | STAU2   | -0.911059899 |
| hsa-miR-29b-1  | STAU2   | -0.982467021 |
| hsa-miR-552    | STAU2   | -0.967305565 |
| hsa-miR-224    | OBFC1   | -0.927311633 |
| hsa-miR-29b-1  | OBFC1   | -0.987457107 |
| hsa-miR-338-3p | OBFC1   | -0.907183328 |
| hsa-miR-552    | OBFC1   | -0.968697014 |
| hsa-miR-224    | EPAS1   | -0.92761344  |
| hsa-miR-29b-1  | EPAS1   | -0.989208883 |
| hsa-miR-552    | EPAS1   | -0.977779285 |
| hsa-miR-224    | CHST4   | -0.933679917 |
| hsa-miR-29b-1  | CHST4   | -0.979579358 |
| hsa-miR-338-3p | CHST4   | -0.916816877 |
| hsa-miR-452    | CHST4   | -0.939774127 |
| hsa-miR-552    | CHST4   | -0.977793062 |
| hsa-miR-224    | TFF3    | -0.925576713 |
| hsa-miR-29b-1  | TFF3    | -0.990602677 |
| hsa-miR-338-3p | TFF3    | -0.923265738 |
| hsa-miR-452    | TFF3    | -0.920349473 |
| hsa-miR-552    | TFF3    | -0.977055234 |

|                |           |              |
|----------------|-----------|--------------|
| hsa-miR-224    | MCOLN3    | -0.921741123 |
| hsa-miR-29b-1  | MCOLN3    | -0.983278218 |
| hsa-miR-338-3p | MCOLN3    | -0.905424899 |
| hsa-miR-452    | MCOLN3    | -0.901431824 |
| hsa-miR-552    | MCOLN3    | -0.964415022 |
| hsa-miR-29b-1  | NUDT4P1   | -0.959305392 |
| hsa-miR-552    | NUDT4P1   | -0.937521127 |
| hsa-miR-29b-1  | MOSC2     | -0.969489055 |
| hsa-miR-338-3p | MOSC2     | -0.929190741 |
| hsa-miR-552    | MOSC2     | -0.938247841 |
| hsa-miR-149    | FXYD5     | -0.944124389 |
| hsa-miR-193b   | FXYD5     | -0.940142985 |
| hsa-miR-210    | FXYD5     | -0.954360363 |
| hsa-miR-505    | FXYD5     | -0.95882127  |
| hsa-miR-770-5p | FXYD5     | -0.960987243 |
| hsa-miR-215    | MYCL1     | -0.909821974 |
| hsa-miR-224    | MYCL1     | -0.941344821 |
| hsa-miR-29b-1  | MYCL1     | -0.968458436 |
| hsa-miR-338-3p | MYCL1     | -0.935418553 |
| hsa-miR-552    | MYCL1     | -0.963004029 |
| hsa-miR-224    | PARP14    | -0.925316619 |
| hsa-miR-29b-1  | PARP14    | -0.98661382  |
| hsa-miR-338-3p | PARP14    | -0.919949666 |
| hsa-miR-452    | PARP14    | -0.902528883 |
| hsa-miR-552    | PARP14    | -0.966834235 |
| hsa-miR-224    | LOC150005 | -0.925615195 |
| hsa-miR-29b-1  | LOC150005 | -0.994827242 |
| hsa-miR-338-3p | LOC150005 | -0.911783376 |
| hsa-miR-552    | LOC150005 | -0.973725076 |
| hsa-miR-224    | TMED7     | -0.920035095 |
| hsa-miR-29b-1  | TMED7     | -0.973633457 |
| hsa-miR-338-3p | TMED7     | -0.944665616 |
| hsa-miR-452    | TMED7     | -0.927977871 |
| hsa-miR-552    | TMED7     | -0.960154597 |
| hsa-miR-224    | FAM122B   | -0.937032795 |
| hsa-miR-29b-1  | FAM122B   | -0.997918449 |
| hsa-miR-552    | FAM122B   | -0.983217141 |
| hsa-miR-224    | C17orf97  | -0.900375663 |
| hsa-miR-29b-1  | C17orf97  | -0.949626883 |
| hsa-miR-338-3p | C17orf97  | -0.947688072 |
| hsa-miR-552    | C17orf97  | -0.924422209 |
| hsa-miR-224    | CASP1     | -0.907072649 |
| hsa-miR-29b-1  | CASP1     | -0.997750326 |
| hsa-miR-552    | CASP1     | -0.964328535 |

|                |           |              |
|----------------|-----------|--------------|
| hsa-miR-224    | C6orf145  | -0.940462891 |
| hsa-miR-29b-1  | C6orf145  | -0.977817429 |
| hsa-miR-338-3p | C6orf145  | -0.913274021 |
| hsa-miR-552    | C6orf145  | -0.975201512 |
| hsa-miR-224    | WDR55     | -0.924011997 |
| hsa-miR-29b-1  | WDR55     | -0.96376565  |
| hsa-miR-552    | WDR55     | -0.971400861 |
| hsa-miR-224    | MCM4      | -0.954764421 |
| hsa-miR-29b-1  | MCM4      | -0.995309903 |
| hsa-miR-338-3p | MCM4      | -0.912745616 |
| hsa-miR-452    | MCM4      | -0.903711483 |
| hsa-miR-552    | MCM4      | -0.989479125 |
| hsa-miR-215    | DIAPH3    | -0.918939299 |
| hsa-miR-224    | DIAPH3    | -0.931579388 |
| hsa-miR-29b-1  | DIAPH3    | -0.966154726 |
| hsa-miR-338-3p | DIAPH3    | -0.960930783 |
| hsa-miR-552    | DIAPH3    | -0.958475566 |
| hsa-miR-770-5p | PML       | -0.928173492 |
| hsa-miR-224    | EMD       | -0.9236978   |
| hsa-miR-29b-1  | EMD       | -0.965157783 |
| hsa-miR-552    | EMD       | -0.962810243 |
| hsa-miR-29b-1  | LIPG      | -0.933570427 |
| hsa-miR-552    | LIPG      | -0.937783064 |
| hsa-miR-224    | HMGB3     | -0.914973959 |
| hsa-miR-29b-1  | HMGB3     | -0.977253867 |
| hsa-miR-552    | HMGB3     | -0.964711988 |
| hsa-miR-224    | MSRA      | -0.950674952 |
| hsa-miR-29b-1  | MSRA      | -0.989257296 |
| hsa-miR-338-3p | MSRA      | -0.916660798 |
| hsa-miR-452    | MSRA      | -0.916962289 |
| hsa-miR-552    | MSRA      | -0.98454548  |
| hsa-miR-224    | NXF3      | -0.930796633 |
| hsa-miR-29b-1  | NXF3      | -0.995461062 |
| hsa-miR-552    | NXF3      | -0.972732329 |
| hsa-miR-224    | AGMAT     | -0.962473727 |
| hsa-miR-29b-1  | AGMAT     | -0.97662746  |
| hsa-miR-338-3p | AGMAT     | -0.935787094 |
| hsa-miR-452    | AGMAT     | -0.912006789 |
| hsa-miR-552    | AGMAT     | -0.97956301  |
| hsa-miR-224    | SEPP1     | -0.941969914 |
| hsa-miR-29b-1  | SEPP1     | -0.976184119 |
| hsa-miR-552    | SEPP1     | -0.981102768 |
| hsa-miR-215    | LOC387895 | -0.934617683 |
| hsa-miR-338-3p | LOC387895 | -0.927342946 |

|                |              |              |
|----------------|--------------|--------------|
| hsa-miR-215    | C1orf97      | -0.926835689 |
| hsa-miR-29b-1  | C1orf97      | -0.917376869 |
| hsa-miR-338-3p | C1orf97      | -0.940710372 |
| hsa-miR-552    | C1orf97      | -0.903646036 |
| hsa-miR-224    | AUTS2        | -0.934223283 |
| hsa-miR-29b-1  | AUTS2        | -0.975663944 |
| hsa-miR-552    | AUTS2        | -0.966961628 |
| hsa-miR-29b-1  | GATM         | -0.977017353 |
| hsa-miR-552    | GATM         | -0.938706973 |
| hsa-miR-215    | EFR3B        | -0.92492181  |
| hsa-miR-29b-1  | EFR3B        | -0.909200559 |
| hsa-miR-338-3p | EFR3B        | -0.943668483 |
| hsa-miR-552    | EFR3B        | -0.900409453 |
| hsa-miR-29b-1  | SYTL1        | -0.930046235 |
| hsa-miR-552    | SYTL1        | -0.925237198 |
| hsa-miR-224    | LOC100507192 | -0.933065573 |
| hsa-miR-29b-1  | LOC100507192 | -0.981549629 |
| hsa-miR-452    | LOC100507192 | -0.929021417 |
| hsa-miR-552    | LOC100507192 | -0.98052305  |
| hsa-miR-224    | SCLY         | -0.903771982 |
| hsa-miR-29b-1  | SCLY         | -0.992827558 |
| hsa-miR-552    | SCLY         | -0.963902203 |
| hsa-miR-29b-1  | TWSG1        | -0.925705677 |
| hsa-miR-552    | TWSG1        | -0.914326986 |
| hsa-miR-29b-1  | EDN1         | -0.924602752 |
| hsa-miR-552    | EDN1         | -0.909493527 |
| hsa-miR-224    | XK           | -0.949584184 |
| hsa-miR-29b-1  | XK           | -0.977126121 |
| hsa-miR-338-3p | XK           | -0.906988625 |
| hsa-miR-452    | XK           | -0.928138371 |
| hsa-miR-552    | XK           | -0.988824061 |
| hsa-miR-224    | CDHR1        | -0.925721417 |
| hsa-miR-29b-1  | CDHR1        | -0.982977018 |
| hsa-miR-452    | CDHR1        | -0.911498332 |
| hsa-miR-552    | CDHR1        | -0.974913433 |
| hsa-miR-29b-1  | TMX4         | -0.971942901 |
| hsa-miR-452    | TMX4         | -0.901323619 |
| hsa-miR-552    | TMX4         | -0.953947141 |
| hsa-miR-224    | KCNN4        | -0.908318793 |
| hsa-miR-29b-1  | KCNN4        | -0.970539167 |
| hsa-miR-452    | KCNN4        | -0.908021439 |
| hsa-miR-552    | KCNN4        | -0.954151464 |
| hsa-miR-215    | TRIM16L      | -0.921020855 |
| hsa-miR-224    | TRIM16L      | -0.92903279  |

|                |         |              |
|----------------|---------|--------------|
| hsa-miR-29b-1  | TRIM16L | -0.958759997 |
| hsa-miR-338-3p | TRIM16L | -0.959729702 |
| hsa-miR-552    | TRIM16L | -0.948979038 |
| hsa-miR-149    | PLSCR1  | -0.958304751 |
| hsa-miR-193b   | PLSCR1  | -0.946678702 |
| hsa-miR-210    | PLSCR1  | -0.96939334  |
| hsa-miR-505    | PLSCR1  | -0.972400156 |
| hsa-miR-770-5p | PLSCR1  | -0.961409699 |
| hsa-miR-224    | TFPI    | -0.937241329 |
| hsa-miR-29b-1  | TFPI    | -0.991474244 |
| hsa-miR-452    | TFPI    | -0.912315145 |
| hsa-miR-552    | TFPI    | -0.983418462 |
| hsa-miR-224    | GALNT10 | -0.910771387 |
| hsa-miR-29b-1  | GALNT10 | -0.990498186 |
| hsa-miR-338-3p | GALNT10 | -0.914475089 |
| hsa-miR-552    | GALNT10 | -0.964194959 |
| hsa-miR-149    | PLOD2   | -0.924765088 |
| hsa-miR-193b   | PLOD2   | -0.91906851  |
| hsa-miR-210    | PLOD2   | -0.937100331 |
| hsa-miR-505    | PLOD2   | -0.944296529 |
| hsa-miR-770-5p | PLOD2   | -0.968115561 |
| hsa-miR-149    | FAM198B | -0.928770872 |
| hsa-miR-193b   | FAM198B | -0.920713954 |
| hsa-miR-210    | FAM198B | -0.939262716 |
| hsa-miR-505    | FAM198B | -0.942927162 |
| hsa-miR-770-5p | FAM198B | -0.974309208 |
| hsa-miR-149    | HOOK3   | -0.918323785 |
| hsa-miR-193b   | HOOK3   | -0.923965264 |
| hsa-miR-210    | HOOK3   | -0.914689498 |
| hsa-miR-505    | HOOK3   | -0.919135262 |
| hsa-miR-770-5p | HOOK3   | -0.914397594 |
| hsa-miR-149    | BTBD16  | -0.954555972 |
| hsa-miR-193b   | BTBD16  | -0.946259603 |
| hsa-miR-210    | BTBD16  | -0.962700114 |
| hsa-miR-505    | BTBD16  | -0.958990055 |
| hsa-miR-770-5p | BTBD16  | -0.977708936 |
| hsa-miR-149    | EFS     | -0.902837067 |
| hsa-miR-193b   | EFS     | -0.902594134 |
| hsa-miR-210    | EFS     | -0.916557573 |
| hsa-miR-505    | EFS     | -0.933380045 |
| hsa-miR-770-5p | EFS     | -0.933976406 |
| hsa-miR-149    | PDLIM2  | -0.93415636  |
| hsa-miR-193b   | PDLIM2  | -0.933699404 |
| hsa-miR-210    | PDLIM2  | -0.941958669 |

|                |          |              |
|----------------|----------|--------------|
| hsa-miR-505    | PDLIM2   | -0.950738217 |
| hsa-miR-770-5p | PDLIM2   | -0.944104027 |
| hsa-miR-149    | ATF6     | -0.913906533 |
| hsa-miR-210    | ATF6     | -0.927071674 |
| hsa-miR-505    | ATF6     | -0.929600804 |
| hsa-miR-770-5p | ATF6     | -0.977518042 |
| hsa-miR-149    | SLC2A13  | -0.930272373 |
| hsa-miR-193b   | SLC2A13  | -0.920038743 |
| hsa-miR-210    | SLC2A13  | -0.945825238 |
| hsa-miR-505    | SLC2A13  | -0.956007844 |
| hsa-miR-770-5p | SLC2A13  | -0.960584225 |
| hsa-miR-149    | MIA3     | -0.952096564 |
| hsa-miR-193b   | MIA3     | -0.953844582 |
| hsa-miR-210    | MIA3     | -0.950451495 |
| hsa-miR-505    | MIA3     | -0.941692357 |
| hsa-miR-770-5p | MIA3     | -0.968258774 |
| hsa-miR-149    | C3orf57  | -0.930377614 |
| hsa-miR-193b   | C3orf57  | -0.927490934 |
| hsa-miR-210    | C3orf57  | -0.94142154  |
| hsa-miR-505    | C3orf57  | -0.936995877 |
| hsa-miR-770-5p | C3orf57  | -0.985509455 |
| hsa-miR-770-5p | AIF1L    | -0.936628494 |
| hsa-miR-149    | EEF1A2   | -0.915882435 |
| hsa-miR-210    | EEF1A2   | -0.929656411 |
| hsa-miR-365    | EEF1A2   | -0.909931112 |
| hsa-miR-505    | EEF1A2   | -0.926865892 |
| hsa-miR-770-5p | EEF1A2   | -0.967204206 |
| hsa-miR-149    | OSBPL1A  | -0.945542182 |
| hsa-miR-193b   | OSBPL1A  | -0.938437874 |
| hsa-miR-210    | OSBPL1A  | -0.951550728 |
| hsa-miR-505    | OSBPL1A  | -0.948986649 |
| hsa-miR-770-5p | OSBPL1A  | -0.975048997 |
| hsa-miR-149    | DKC1     | -0.930380193 |
| hsa-miR-193b   | DKC1     | -0.934515791 |
| hsa-miR-210    | DKC1     | -0.938424217 |
| hsa-miR-505    | DKC1     | -0.937690868 |
| hsa-miR-770-5p | DKC1     | -0.971689736 |
| hsa-miR-210    | FLJ22184 | -0.903188836 |
| hsa-miR-770-5p | FLJ22184 | -0.949631257 |
| hsa-miR-149    | CD55     | -0.947374593 |
| hsa-miR-193b   | CD55     | -0.943431649 |
| hsa-miR-210    | CD55     | -0.949663517 |
| hsa-miR-505    | CD55     | -0.947180211 |
| hsa-miR-770-5p | CD55     | -0.963134595 |

|                |        |              |
|----------------|--------|--------------|
| hsa-miR-149    | CD244  | -0.919146891 |
| hsa-miR-193b   | CD244  | -0.910638207 |
| hsa-miR-210    | CD244  | -0.937779562 |
| hsa-miR-505    | CD244  | -0.947140067 |
| hsa-miR-770-5p | CD244  | -0.958598675 |
| hsa-miR-149    | MYST3  | -0.917925743 |
| hsa-miR-193b   | MYST3  | -0.909821459 |
| hsa-miR-210    | MYST3  | -0.935852888 |
| hsa-miR-505    | MYST3  | -0.957292619 |
| hsa-miR-149    | MTO1   | -0.915348121 |
| hsa-miR-210    | MTO1   | -0.922076312 |
| hsa-miR-505    | MTO1   | -0.913446464 |
| hsa-miR-770-5p | MTO1   | -0.961649709 |
| hsa-miR-149    | NUDT12 | -0.949984461 |
| hsa-miR-193b   | NUDT12 | -0.933448092 |
| hsa-miR-210    | NUDT12 | -0.959323962 |
| hsa-miR-365    | NUDT12 | -0.916075778 |
| hsa-miR-505    | NUDT12 | -0.961403085 |
| hsa-miR-770-5p | NUDT12 | -0.962194683 |
| hsa-miR-149    | MCAM   | -0.965265066 |
| hsa-miR-193b   | MCAM   | -0.958163875 |
| hsa-miR-210    | MCAM   | -0.97070459  |
| hsa-miR-505    | MCAM   | -0.967221243 |
| hsa-miR-770-5p | MCAM   | -0.966224886 |
| hsa-miR-149    | LANCL2 | -0.953505715 |
| hsa-miR-193b   | LANCL2 | -0.941485333 |
| hsa-miR-210    | LANCL2 | -0.95491816  |
| hsa-miR-505    | LANCL2 | -0.933935854 |
| hsa-miR-770-5p | LANCL2 | -0.97852951  |
| hsa-miR-149    | CLGN   | -0.940673884 |
| hsa-miR-193b   | CLGN   | -0.931919401 |
| hsa-miR-210    | CLGN   | -0.952257002 |
| hsa-miR-505    | CLGN   | -0.942199097 |
| hsa-miR-770-5p | CLGN   | -0.984956196 |
| hsa-miR-149    | CCNE2  | -0.937854051 |
| hsa-miR-193b   | CCNE2  | -0.941076836 |
| hsa-miR-210    | CCNE2  | -0.947472501 |
| hsa-miR-505    | CCNE2  | -0.950237489 |
| hsa-miR-770-5p | CCNE2  | -0.944490495 |
| hsa-miR-149    | IFNGR1 | -0.929786093 |
| hsa-miR-193b   | IFNGR1 | -0.934509851 |
| hsa-miR-210    | IFNGR1 | -0.924942683 |
| hsa-miR-505    | IFNGR1 | -0.920180038 |
| hsa-miR-770-5p | IFNGR1 | -0.945187684 |

|                |           |              |
|----------------|-----------|--------------|
| hsa-miR-149    | LAPTM4B   | -0.923807165 |
| hsa-miR-193b   | LAPTM4B   | -0.920674378 |
| hsa-miR-210    | LAPTM4B   | -0.930753445 |
| hsa-miR-505    | LAPTM4B   | -0.938617842 |
| hsa-miR-770-5p | LAPTM4B   | -0.951867254 |
| hsa-miR-210    | ASCL2     | -0.910499958 |
| hsa-miR-505    | ASCL2     | -0.915973409 |
| hsa-miR-770-5p | ASCL2     | -0.974570914 |
| hsa-miR-149    | LPIN2     | -0.957953549 |
| hsa-miR-193b   | LPIN2     | -0.944605567 |
| hsa-miR-210    | LPIN2     | -0.962246487 |
| hsa-miR-365    | LPIN2     | -0.903504431 |
| hsa-miR-505    | LPIN2     | -0.954803389 |
| hsa-miR-770-5p | LPIN2     | -0.969123455 |
| hsa-miR-149    | FSCN1     | -0.955476387 |
| hsa-miR-193b   | FSCN1     | -0.948071817 |
| hsa-miR-210    | FSCN1     | -0.96332696  |
| hsa-miR-505    | FSCN1     | -0.962803167 |
| hsa-miR-770-5p | FSCN1     | -0.969473546 |
| hsa-miR-149    | TMEM66    | -0.955395045 |
| hsa-miR-193b   | TMEM66    | -0.96132991  |
| hsa-miR-210    | TMEM66    | -0.953253971 |
| hsa-miR-505    | TMEM66    | -0.936897585 |
| hsa-miR-770-5p | TMEM66    | -0.982100569 |
| hsa-miR-149    | LOC283867 | -0.93872315  |
| hsa-miR-193b   | LOC283867 | -0.928575552 |
| hsa-miR-210    | LOC283867 | -0.94634187  |
| hsa-miR-505    | LOC283867 | -0.945044047 |
| hsa-miR-770-5p | LOC283867 | -0.975630588 |
| hsa-miR-149    | FAM60A    | -0.92371658  |
| hsa-miR-193b   | FAM60A    | -0.907274516 |
| hsa-miR-210    | FAM60A    | -0.942302887 |
| hsa-miR-505    | FAM60A    | -0.954522202 |
| hsa-miR-770-5p | FAM60A    | -0.962481816 |
| hsa-miR-149    | SKAP1     | -0.943989261 |
| hsa-miR-193b   | SKAP1     | -0.924676964 |
| hsa-miR-210    | SKAP1     | -0.957310766 |
| hsa-miR-505    | SKAP1     | -0.944957362 |
| hsa-miR-770-5p | SKAP1     | -0.978314514 |
| hsa-miR-149    | C11orf75  | -0.940636672 |
| hsa-miR-193b   | C11orf75  | -0.927738046 |
| hsa-miR-210    | C11orf75  | -0.945869738 |
| hsa-miR-365    | C11orf75  | -0.900763486 |
| hsa-miR-505    | C11orf75  | -0.941924599 |



|                |          |              |
|----------------|----------|--------------|
| hsa-miR-770-5p | C11orf75 | -0.968629563 |
| hsa-miR-149    | IFI6     | -0.952194447 |
| hsa-miR-193b   | IFI6     | -0.957440866 |
| hsa-miR-210    | IFI6     | -0.953110045 |
| hsa-miR-505    | IFI6     | -0.944832824 |
| hsa-miR-770-5p | IFI6     | -0.973730514 |
| hsa-miR-149    | ZNF614   | -0.951249137 |
| hsa-miR-193b   | ZNF614   | -0.948552383 |
| hsa-miR-210    | ZNF614   | -0.957830281 |
| hsa-miR-505    | ZNF614   | -0.948824811 |
| hsa-miR-770-5p | ZNF614   | -0.984130257 |
| hsa-miR-149    | KLHL5    | -0.921169883 |
| hsa-miR-193b   | KLHL5    | -0.921433144 |
| hsa-miR-210    | KLHL5    | -0.921872172 |
| hsa-miR-505    | KLHL5    | -0.923239349 |
| hsa-miR-770-5p | KLHL5    | -0.949970008 |
| hsa-miR-149    | FBXL16   | -0.949052878 |
| hsa-miR-193b   | FBXL16   | -0.94432541  |
| hsa-miR-210    | FBXL16   | -0.958184694 |
| hsa-miR-505    | FBXL16   | -0.956399643 |
| hsa-miR-770-5p | FBXL16   | -0.975320592 |
| hsa-miR-149    | RASGRF2  | -0.938497762 |
| hsa-miR-193b   | RASGRF2  | -0.925442824 |
| hsa-miR-210    | RASGRF2  | -0.945146951 |
| hsa-miR-505    | RASGRF2  | -0.941886585 |
| hsa-miR-770-5p | RASGRF2  | -0.972799458 |
| hsa-miR-149    | IMPA1    | -0.938855204 |
| hsa-miR-193b   | IMPA1    | -0.934540641 |
| hsa-miR-210    | IMPA1    | -0.936405569 |
| hsa-miR-505    | IMPA1    | -0.921319551 |
| hsa-miR-770-5p | IMPA1    | -0.972907731 |
| hsa-miR-149    | CSF2RA   | -0.937812059 |
| hsa-miR-193b   | CSF2RA   | -0.926708639 |
| hsa-miR-210    | CSF2RA   | -0.949708081 |
| hsa-miR-505    | CSF2RA   | -0.950870681 |
| hsa-miR-770-5p | CSF2RA   | -0.979182789 |
| hsa-miR-149    | ABCC11   | -0.936367557 |
| hsa-miR-193b   | ABCC11   | -0.919818928 |
| hsa-miR-210    | ABCC11   | -0.950183121 |
| hsa-miR-505    | ABCC11   | -0.951987167 |
| hsa-miR-770-5p | ABCC11   | -0.978075285 |
| hsa-miR-149    | SLC39A8  | -0.945046561 |
| hsa-miR-193b   | SLC39A8  | -0.936443575 |
| hsa-miR-210    | SLC39A8  | -0.954018422 |

|                |         |              |
|----------------|---------|--------------|
| hsa-miR-505    | SLC39A8 | -0.959671517 |
| hsa-miR-770-5p | SLC39A8 | -0.958343703 |
| hsa-miR-149    | LRP12   | -0.926992894 |
| hsa-miR-193b   | LRP12   | -0.904133712 |
| hsa-miR-210    | LRP12   | -0.937632638 |
| hsa-miR-365    | LRP12   | -0.910057341 |
| hsa-miR-505    | LRP12   | -0.934438524 |
| hsa-miR-770-5p | LRP12   | -0.96899373  |
| hsa-miR-149    | ALPK3   | -0.933067275 |
| hsa-miR-193b   | ALPK3   | -0.923588769 |
| hsa-miR-210    | ALPK3   | -0.945002724 |
| hsa-miR-505    | ALPK3   | -0.950169962 |
| hsa-miR-770-5p | ALPK3   | -0.971535308 |
| hsa-miR-210    | UGGT2   | -0.915483173 |
| hsa-miR-505    | UGGT2   | -0.924247444 |
| hsa-miR-770-5p | UGGT2   | -0.974895623 |
| hsa-miR-149    | FAM26E  | -0.931140381 |
| hsa-miR-193b   | FAM26E  | -0.911328973 |
| hsa-miR-210    | FAM26E  | -0.947676297 |
| hsa-miR-505    | FAM26E  | -0.945429297 |
| hsa-miR-770-5p | FAM26E  | -0.982991747 |
| hsa-miR-149    | CCL20   | -0.929859972 |
| hsa-miR-193b   | CCL20   | -0.921658889 |
| hsa-miR-210    | CCL20   | -0.931080234 |
| hsa-miR-505    | CCL20   | -0.927546856 |
| hsa-miR-770-5p | CCL20   | -0.956230185 |
| hsa-miR-149    | HERC6   | -0.923214679 |
| hsa-miR-193b   | HERC6   | -0.911089719 |
| hsa-miR-210    | HERC6   | -0.929672648 |
| hsa-miR-505    | HERC6   | -0.918463366 |
| hsa-miR-770-5p | HERC6   | -0.986871827 |
| hsa-miR-210    | DTNB    | -0.919657181 |
| hsa-miR-505    | DTNB    | -0.941208328 |
| hsa-miR-770-5p | DTNB    | -0.937915336 |
| hsa-miR-149    | NSDHL   | -0.916811627 |
| hsa-miR-193b   | NSDHL   | -0.923467683 |
| hsa-miR-210    | NSDHL   | -0.920003124 |
| hsa-miR-505    | NSDHL   | -0.931381698 |
| hsa-miR-770-5p | NSDHL   | -0.9161565   |
| hsa-miR-149    | SLC4A11 | -0.931092474 |
| hsa-miR-193b   | SLC4A11 | -0.931921909 |
| hsa-miR-210    | SLC4A11 | -0.93219969  |
| hsa-miR-505    | SLC4A11 | -0.922773436 |
| hsa-miR-770-5p | SLC4A11 | -0.983105217 |

|                |          |              |
|----------------|----------|--------------|
| hsa-miR-149    | MOSPD1   | -0.950824883 |
| hsa-miR-193b   | MOSPD1   | -0.937656916 |
| hsa-miR-210    | MOSPD1   | -0.961303431 |
| hsa-miR-505    | MOSPD1   | -0.95948371  |
| hsa-miR-770-5p | MOSPD1   | -0.977392823 |
| hsa-miR-149    | TRAPPC6A | -0.909097318 |
| hsa-miR-210    | TRAPPC6A | -0.926803895 |
| hsa-miR-505    | TRAPPC6A | -0.932652574 |
| hsa-miR-770-5p | TRAPPC6A | -0.978370843 |
| hsa-miR-149    | LRRN4    | -0.949373184 |
| hsa-miR-193b   | LRRN4    | -0.940180059 |
| hsa-miR-210    | LRRN4    | -0.957363096 |
| hsa-miR-505    | LRRN4    | -0.956108208 |
| hsa-miR-770-5p | LRRN4    | -0.974524111 |
| hsa-miR-149    | DOCK1    | -0.942619921 |
| hsa-miR-193b   | DOCK1    | -0.941469858 |
| hsa-miR-210    | DOCK1    | -0.947219936 |
| hsa-miR-505    | DOCK1    | -0.937156454 |
| hsa-miR-770-5p | DOCK1    | -0.989184076 |
| hsa-miR-149    | SH3D20   | -0.973068354 |
| hsa-miR-193b   | SH3D20   | -0.962563413 |
| hsa-miR-210    | SH3D20   | -0.976525985 |
| hsa-miR-505    | SH3D20   | -0.966036599 |
| hsa-miR-770-5p | SH3D20   | -0.969347366 |
| hsa-miR-149    | PDZK1    | -0.9397757   |
| hsa-miR-193b   | PDZK1    | -0.934210963 |
| hsa-miR-210    | PDZK1    | -0.94963598  |
| hsa-miR-505    | PDZK1    | -0.947810099 |
| hsa-miR-770-5p | PDZK1    | -0.981863301 |
| hsa-miR-149    | 01-Sep   | -0.94208603  |
| hsa-miR-193b   | 01-Sep   | -0.940080484 |
| hsa-miR-210    | 01-Sep   | -0.950023257 |
| hsa-miR-505    | 01-Sep   | -0.949432076 |
| hsa-miR-770-5p | 01-Sep   | -0.974813055 |
| hsa-miR-149    | ASAH1    | -0.91890209  |
| hsa-miR-193b   | ASAH1    | -0.912732419 |
| hsa-miR-210    | ASAH1    | -0.931587837 |
| hsa-miR-505    | ASAH1    | -0.936290001 |
| hsa-miR-770-5p | ASAH1    | -0.977409915 |
| hsa-miR-149    | FAM3A    | -0.947983446 |
| hsa-miR-193b   | FAM3A    | -0.953908052 |
| hsa-miR-210    | FAM3A    | -0.949755187 |
| hsa-miR-505    | FAM3A    | -0.947531602 |
| hsa-miR-770-5p | FAM3A    | -0.958706229 |

|                |          |              |
|----------------|----------|--------------|
| hsa-miR-149    | BIRC3    | -0.91025202  |
| hsa-miR-193b   | BIRC3    | -0.912992031 |
| hsa-miR-210    | BIRC3    | -0.923541078 |
| hsa-miR-505    | BIRC3    | -0.936493326 |
| hsa-miR-770-5p | BIRC3    | -0.932974795 |
| hsa-miR-149    | GATA3    | -0.917557582 |
| hsa-miR-210    | GATA3    | -0.938464114 |
| hsa-miR-365    | GATA3    | -0.905656941 |
| hsa-miR-505    | GATA3    | -0.946836588 |
| hsa-miR-770-5p | GATA3    | -0.970474545 |
| hsa-miR-149    | PEX3     | -0.95499501  |
| hsa-miR-193b   | PEX3     | -0.955378048 |
| hsa-miR-210    | PEX3     | -0.961101964 |
| hsa-miR-505    | PEX3     | -0.956221914 |
| hsa-miR-770-5p | PEX3     | -0.970030324 |
| hsa-miR-770-5p | VIPR1    | -0.928485238 |
| hsa-miR-210    | AZGP1    | -0.901707862 |
| hsa-miR-770-5p | AZGP1    | -0.96067447  |
| hsa-miR-149    | RGS16    | -0.934422089 |
| hsa-miR-193b   | RGS16    | -0.91616316  |
| hsa-miR-210    | RGS16    | -0.949572583 |
| hsa-miR-365    | RGS16    | -0.901144748 |
| hsa-miR-505    | RGS16    | -0.953688878 |
| hsa-miR-770-5p | RGS16    | -0.974685517 |
| hsa-miR-149    | SERPINA1 | -0.940977473 |
| hsa-miR-193b   | SERPINA1 | -0.923307158 |
| hsa-miR-210    | SERPINA1 | -0.950532418 |
| hsa-miR-365    | SERPINA1 | -0.91118472  |
| hsa-miR-505    | SERPINA1 | -0.95032312  |
| hsa-miR-770-5p | SERPINA1 | -0.968892365 |
| hsa-miR-149    | FAIM     | -0.951770329 |
| hsa-miR-193b   | FAIM     | -0.93235647  |
| hsa-miR-210    | FAIM     | -0.962201972 |
| hsa-miR-365    | FAIM     | -0.921832663 |
| hsa-miR-505    | FAIM     | -0.96407551  |
| hsa-miR-770-5p | FAIM     | -0.96164597  |
| hsa-miR-149    | NAB2     | -0.935335151 |
| hsa-miR-193b   | NAB2     | -0.944926087 |
| hsa-miR-210    | NAB2     | -0.936405573 |
| hsa-miR-505    | NAB2     | -0.927421861 |
| hsa-miR-770-5p | NAB2     | -0.979694089 |
| hsa-miR-210    | VBP1     | -0.901911536 |
| hsa-miR-770-5p | VBP1     | -0.982783842 |
| hsa-miR-149    | RPS21    | -0.936228495 |

|                |           |              |
|----------------|-----------|--------------|
| hsa-miR-193b   | RPS21     | -0.934441689 |
| hsa-miR-210    | RPS21     | -0.945443125 |
| hsa-miR-505    | RPS21     | -0.952810936 |
| hsa-miR-770-5p | RPS21     | -0.953114552 |
| hsa-miR-149    | GCNT1     | -0.956385164 |
| hsa-miR-193b   | GCNT1     | -0.951649949 |
| hsa-miR-210    | GCNT1     | -0.962737458 |
| hsa-miR-505    | GCNT1     | -0.960565429 |
| hsa-miR-770-5p | GCNT1     | -0.970284448 |
| hsa-miR-149    | CARD9     | -0.946315535 |
| hsa-miR-193b   | CARD9     | -0.958412833 |
| hsa-miR-210    | CARD9     | -0.943562568 |
| hsa-miR-505    | CARD9     | -0.931407222 |
| hsa-miR-770-5p | CARD9     | -0.972962739 |
| hsa-miR-149    | LOC92249  | -0.951925884 |
| hsa-miR-193b   | LOC92249  | -0.947255985 |
| hsa-miR-210    | LOC92249  | -0.95318717  |
| hsa-miR-505    | LOC92249  | -0.938023843 |
| hsa-miR-770-5p | LOC92249  | -0.985215836 |
| hsa-miR-149    | IFIT1     | -0.915728528 |
| hsa-miR-210    | IFIT1     | -0.923097717 |
| hsa-miR-365    | IFIT1     | -0.922018042 |
| hsa-miR-505    | IFIT1     | -0.933099455 |
| hsa-miR-770-5p | IFIT1     | -0.926038618 |
| hsa-miR-149    | HPDL      | -0.937377529 |
| hsa-miR-193b   | HPDL      | -0.92984416  |
| hsa-miR-210    | HPDL      | -0.943965387 |
| hsa-miR-505    | HPDL      | -0.943761007 |
| hsa-miR-770-5p | HPDL      | -0.97218416  |
| hsa-miR-149    | HIST1H2BD | -0.928789055 |
| hsa-miR-193b   | HIST1H2BD | -0.918325894 |
| hsa-miR-210    | HIST1H2BD | -0.931649087 |
| hsa-miR-365    | HIST1H2BD | -0.910325665 |
| hsa-miR-505    | HIST1H2BD | -0.938248444 |
| hsa-miR-770-5p | HIST1H2BD | -0.924807437 |
| hsa-miR-149    | ZNF514    | -0.930983411 |
| hsa-miR-193b   | ZNF514    | -0.927861839 |
| hsa-miR-210    | ZNF514    | -0.937858678 |
| hsa-miR-505    | ZNF514    | -0.944642093 |
| hsa-miR-770-5p | ZNF514    | -0.953799545 |
| hsa-miR-149    | DTNA      | -0.960498806 |
| hsa-miR-193b   | DTNA      | -0.948408123 |
| hsa-miR-210    | DTNA      | -0.969332301 |
| hsa-miR-505    | DTNA      | -0.964927435 |

|                |           |              |
|----------------|-----------|--------------|
| hsa-miR-770-5p | DTNA      | -0.975290255 |
| hsa-miR-149    | MDK       | -0.913684033 |
| hsa-miR-193b   | MDK       | -0.916807009 |
| hsa-miR-210    | MDK       | -0.924729226 |
| hsa-miR-505    | MDK       | -0.940182589 |
| hsa-miR-770-5p | MDK       | -0.916728268 |
| hsa-miR-149    | PAM       | -0.940526933 |
| hsa-miR-193b   | PAM       | -0.92488462  |
| hsa-miR-210    | PAM       | -0.95792808  |
| hsa-miR-505    | PAM       | -0.95873478  |
| hsa-miR-770-5p | PAM       | -0.9711431   |
| hsa-miR-149    | SORD      | -0.937420858 |
| hsa-miR-193b   | SORD      | -0.925972881 |
| hsa-miR-210    | SORD      | -0.945446518 |
| hsa-miR-505    | SORD      | -0.943058519 |
| hsa-miR-770-5p | SORD      | -0.978087852 |
| hsa-miR-149    | NMB       | -0.960281797 |
| hsa-miR-193b   | NMB       | -0.956028115 |
| hsa-miR-210    | NMB       | -0.968489799 |
| hsa-miR-505    | NMB       | -0.969822928 |
| hsa-miR-770-5p | NMB       | -0.953390557 |
| hsa-miR-149    | HEATR7A   | -0.907510204 |
| hsa-miR-210    | HEATR7A   | -0.908210756 |
| hsa-miR-770-5p | HEATR7A   | -0.958661193 |
| hsa-miR-149    | MTCP1NB   | -0.925094099 |
| hsa-miR-193b   | MTCP1NB   | -0.904932267 |
| hsa-miR-210    | MTCP1NB   | -0.937139778 |
| hsa-miR-365    | MTCP1NB   | -0.906413603 |
| hsa-miR-505    | MTCP1NB   | -0.937799153 |
| hsa-miR-770-5p | MTCP1NB   | -0.97229061  |
| hsa-miR-149    | LOC388946 | -0.954367593 |
| hsa-miR-193b   | LOC388946 | -0.945636446 |
| hsa-miR-210    | LOC388946 | -0.966001609 |
| hsa-miR-505    | LOC388946 | -0.969402995 |
| hsa-miR-770-5p | LOC388946 | -0.959962891 |
| hsa-miR-149    | DDX60L    | -0.929572063 |
| hsa-miR-193b   | DDX60L    | -0.945723525 |
| hsa-miR-210    | DDX60L    | -0.927154257 |
| hsa-miR-505    | DDX60L    | -0.924941039 |
| hsa-miR-770-5p | DDX60L    | -0.943384572 |
| hsa-miR-149    | PHLPP2    | -0.909213201 |
| hsa-miR-210    | PHLPP2    | -0.928354011 |
| hsa-miR-505    | PHLPP2    | -0.936183408 |
| hsa-miR-770-5p | PHLPP2    | -0.973327124 |

|                |          |              |
|----------------|----------|--------------|
| hsa-miR-149    | DRAM1    | -0.941142793 |
| hsa-miR-193b   | DRAM1    | -0.935421394 |
| hsa-miR-210    | DRAM1    | -0.949117118 |
| hsa-miR-505    | DRAM1    | -0.955154817 |
| hsa-miR-770-5p | DRAM1    | -0.956078178 |
| hsa-miR-149    | RBM9     | -0.90746787  |
| hsa-miR-210    | RBM9     | -0.920609317 |
| hsa-miR-505    | RBM9     | -0.919161794 |
| hsa-miR-770-5p | RBM9     | -0.971614055 |
| hsa-miR-149    | KIAA0182 | -0.924733345 |
| hsa-miR-193b   | KIAA0182 | -0.920388105 |
| hsa-miR-210    | KIAA0182 | -0.933664988 |
| hsa-miR-505    | KIAA0182 | -0.94198037  |
| hsa-miR-770-5p | KIAA0182 | -0.956788418 |
| hsa-miR-149    | SLC37A1  | -0.930818472 |
| hsa-miR-193b   | SLC37A1  | -0.904465549 |
| hsa-miR-210    | SLC37A1  | -0.945753175 |
| hsa-miR-365    | SLC37A1  | -0.938269955 |
| hsa-miR-505    | SLC37A1  | -0.956283101 |
| hsa-miR-770-5p | SLC37A1  | -0.945589634 |
| hsa-miR-210    | ZNF467   | -0.919432455 |
| hsa-miR-505    | ZNF467   | -0.932918682 |
| hsa-miR-770-5p | ZNF467   | -0.954223557 |
| hsa-miR-149    | LY75     | -0.941683224 |
| hsa-miR-193b   | LY75     | -0.937929101 |
| hsa-miR-210    | LY75     | -0.953095581 |
| hsa-miR-505    | LY75     | -0.959394311 |
| hsa-miR-770-5p | LY75     | -0.954480737 |
| hsa-miR-149    | SNX24    | -0.966558253 |
| hsa-miR-193b   | SNX24    | -0.955224008 |
| hsa-miR-210    | SNX24    | -0.973078164 |
| hsa-miR-365    | SNX24    | -0.903280496 |
| hsa-miR-505    | SNX24    | -0.970915504 |
| hsa-miR-770-5p | SNX24    | -0.962744276 |
| hsa-miR-149    | B4GALT5  | -0.900164092 |
| hsa-miR-210    | B4GALT5  | -0.92166031  |
| hsa-miR-505    | B4GALT5  | -0.935043254 |
| hsa-miR-770-5p | B4GALT5  | -0.967516267 |
| hsa-miR-149    | C8orf40  | -0.916685494 |
| hsa-miR-193b   | C8orf40  | -0.902103209 |
| hsa-miR-210    | C8orf40  | -0.934027836 |
| hsa-miR-505    | C8orf40  | -0.940403206 |
| hsa-miR-770-5p | C8orf40  | -0.978163446 |
| hsa-miR-210    | C9orf64  | -0.909332336 |

|                |              |              |
|----------------|--------------|--------------|
| hsa-miR-505    | C9orf64      | -0.906705068 |
| hsa-miR-770-5p | C9orf64      | -0.976027518 |
| hsa-miR-149    | LYST         | -0.936652746 |
| hsa-miR-193b   | LYST         | -0.926439728 |
| hsa-miR-210    | LYST         | -0.949264324 |
| hsa-miR-505    | LYST         | -0.950031614 |
| hsa-miR-770-5p | LYST         | -0.980718005 |
| hsa-miR-505    | CYP3A5       | -0.909817272 |
| hsa-miR-770-5p | CYP3A5       | -0.9199093   |
| hsa-miR-149    | ITPRIPL2     | -0.948479763 |
| hsa-miR-193b   | ITPRIPL2     | -0.941187101 |
| hsa-miR-210    | ITPRIPL2     | -0.955394804 |
| hsa-miR-505    | ITPRIPL2     | -0.959264816 |
| hsa-miR-770-5p | ITPRIPL2     | -0.957004796 |
| hsa-miR-149    | FLJ39632     | -0.916655956 |
| hsa-miR-210    | FLJ39632     | -0.919030745 |
| hsa-miR-505    | FLJ39632     | -0.908930625 |
| hsa-miR-770-5p | FLJ39632     | -0.951069296 |
| hsa-miR-149    | CCDC123      | -0.956061796 |
| hsa-miR-193b   | CCDC123      | -0.952381711 |
| hsa-miR-210    | CCDC123      | -0.962000224 |
| hsa-miR-505    | CCDC123      | -0.963650186 |
| hsa-miR-770-5p | CCDC123      | -0.956813073 |
| hsa-miR-149    | LOC100288954 | -0.916774858 |
| hsa-miR-210    | LOC100288954 | -0.937430188 |
| hsa-miR-505    | LOC100288954 | -0.940168286 |
| hsa-miR-770-5p | LOC100288954 | -0.978786414 |
| hsa-miR-149    | CNN3         | -0.945080506 |
| hsa-miR-193b   | CNN3         | -0.92291716  |
| hsa-miR-210    | CNN3         | -0.952460838 |
| hsa-miR-365    | CNN3         | -0.916108795 |
| hsa-miR-505    | CNN3         | -0.94553309  |
| hsa-miR-770-5p | CNN3         | -0.963795901 |
| hsa-miR-149    | ACTR3C       | -0.943526512 |
| hsa-miR-193b   | ACTR3C       | -0.93694797  |
| hsa-miR-210    | ACTR3C       | -0.950638403 |
| hsa-miR-505    | ACTR3C       | -0.949620446 |
| hsa-miR-770-5p | ACTR3C       | -0.975106707 |
| hsa-miR-210    | RDH5         | -0.904544375 |
| hsa-miR-505    | RDH5         | -0.917364295 |
| hsa-miR-770-5p | RDH5         | -0.949799629 |
| hsa-miR-210    | RFK          | -0.905399849 |
| hsa-miR-505    | RFK          | -0.901822445 |
| hsa-miR-770-5p | RFK          | -0.990123198 |



|                |              |              |
|----------------|--------------|--------------|
| hsa-miR-149    | GIN51        | -0.923794522 |
| hsa-miR-193b   | GIN51        | -0.936719472 |
| hsa-miR-210    | GIN51        | -0.927246831 |
| hsa-miR-505    | GIN51        | -0.922715414 |
| hsa-miR-770-5p | GIN51        | -0.967632134 |
| hsa-miR-149    | ARRDC4       | -0.911025264 |
| hsa-miR-210    | ARRDC4       | -0.923212205 |
| hsa-miR-365    | ARRDC4       | -0.905063295 |
| hsa-miR-505    | ARRDC4       | -0.929104287 |
| hsa-miR-770-5p | ARRDC4       | -0.963230742 |
| hsa-miR-193b   | LOC100129029 | -0.915647258 |
| hsa-miR-149    | INPP5D       | -0.928079748 |
| hsa-miR-193b   | INPP5D       | -0.936546328 |
| hsa-miR-210    | INPP5D       | -0.932291238 |
| hsa-miR-505    | INPP5D       | -0.933864451 |
| hsa-miR-770-5p | INPP5D       | -0.957977478 |
| hsa-miR-149    | MLLT11       | -0.932506227 |
| hsa-miR-193b   | MLLT11       | -0.941837723 |
| hsa-miR-210    | MLLT11       | -0.925337001 |
| hsa-miR-505    | MLLT11       | -0.925636609 |
| hsa-miR-770-5p | MLLT11       | -0.908246004 |
| hsa-miR-210    | NDUFA4L2     | -0.921968551 |
| hsa-miR-505    | NDUFA4L2     | -0.93493889  |
| hsa-miR-770-5p | NDUFA4L2     | -0.962904086 |
| hsa-miR-149    | C1orf58      | -0.939838476 |
| hsa-miR-193b   | C1orf58      | -0.941626806 |
| hsa-miR-210    | C1orf58      | -0.944059425 |
| hsa-miR-505    | C1orf58      | -0.945873534 |
| hsa-miR-770-5p | C1orf58      | -0.959459461 |
| hsa-miR-770-5p | TRIM22       | -0.957296922 |
| hsa-miR-149    | SLC25A42     | -0.901172815 |
| hsa-miR-210    | SLC25A42     | -0.918704767 |
| hsa-miR-505    | SLC25A42     | -0.937805411 |
| hsa-miR-770-5p | SLC25A42     | -0.942817244 |
| hsa-miR-149    | PARP9        | -0.923694985 |
| hsa-miR-193b   | PARP9        | -0.900497215 |
| hsa-miR-210    | PARP9        | -0.936722435 |
| hsa-miR-365    | PARP9        | -0.908421775 |
| hsa-miR-505    | PARP9        | -0.936044017 |
| hsa-miR-770-5p | PARP9        | -0.972215156 |
| hsa-miR-210    | ATE1         | -0.900465772 |
| hsa-miR-505    | ATE1         | -0.921252367 |
| hsa-miR-770-5p | ATE1         | -0.940134827 |
| hsa-miR-149    | KANK1        | -0.943499149 |

|                |           |              |
|----------------|-----------|--------------|
| hsa-miR-193b   | KANK1     | -0.922471545 |
| hsa-miR-210    | KANK1     | -0.952651617 |
| hsa-miR-365    | KANK1     | -0.928467193 |
| hsa-miR-505    | KANK1     | -0.955292049 |
| hsa-miR-770-5p | KANK1     | -0.952701569 |
| hsa-miR-505    | LOC339260 | -0.903524821 |
| hsa-miR-770-5p | LOC339260 | -0.926306853 |
| hsa-miR-149    | ARRB1     | -0.953566601 |
| hsa-miR-193b   | ARRB1     | -0.945973616 |
| hsa-miR-210    | ARRB1     | -0.964790174 |
| hsa-miR-505    | ARRB1     | -0.970286418 |
| hsa-miR-770-5p | ARRB1     | -0.952045314 |
| hsa-miR-149    | SIGMAR1   | -0.92828074  |
| hsa-miR-193b   | SIGMAR1   | -0.928215824 |
| hsa-miR-210    | SIGMAR1   | -0.934473026 |
| hsa-miR-505    | SIGMAR1   | -0.936341426 |
| hsa-miR-770-5p | SIGMAR1   | -0.969891422 |
| hsa-miR-149    | DENND5B   | -0.923691024 |
| hsa-miR-193b   | DENND5B   | -0.904970537 |
| hsa-miR-210    | DENND5B   | -0.92858845  |
| hsa-miR-365    | DENND5B   | -0.911286067 |
| hsa-miR-505    | DENND5B   | -0.925416309 |
| hsa-miR-770-5p | DENND5B   | -0.951551359 |
| hsa-miR-149    | LOC146336 | -0.944312377 |
| hsa-miR-193b   | LOC146336 | -0.923543447 |
| hsa-miR-210    | LOC146336 | -0.954609211 |
| hsa-miR-505    | LOC146336 | -0.944507989 |
| hsa-miR-770-5p | LOC146336 | -0.979233362 |
| hsa-miR-149    | TACC1     | -0.933196281 |
| hsa-miR-193b   | TACC1     | -0.915395103 |
| hsa-miR-210    | TACC1     | -0.944238645 |
| hsa-miR-505    | TACC1     | -0.940880702 |
| hsa-miR-770-5p | TACC1     | -0.980139701 |
| hsa-miR-149    | C1orf163  | -0.934788024 |
| hsa-miR-193b   | C1orf163  | -0.908615094 |
| hsa-miR-210    | C1orf163  | -0.949929691 |
| hsa-miR-505    | C1orf163  | -0.941247376 |
| hsa-miR-770-5p | C1orf163  | -0.975904752 |
| hsa-miR-149    | NOTCH3    | -0.938682721 |
| hsa-miR-193b   | NOTCH3    | -0.925620956 |
| hsa-miR-210    | NOTCH3    | -0.94902816  |
| hsa-miR-505    | NOTCH3    | -0.951584585 |
| hsa-miR-770-5p | NOTCH3    | -0.971416324 |
| hsa-miR-149    | ERICH1    | -0.923079636 |

|                |          |              |
|----------------|----------|--------------|
| hsa-miR-193b   | ERICH1   | -0.918375161 |
| hsa-miR-210    | ERICH1   | -0.939018868 |
| hsa-miR-505    | ERICH1   | -0.952241207 |
| hsa-miR-770-5p | ERICH1   | -0.938389627 |
| hsa-miR-210    | TNKS     | -0.900213191 |
| hsa-miR-505    | TNKS     | -0.900498847 |
| hsa-miR-770-5p | TNKS     | -0.962435484 |
| hsa-miR-149    | DHFRL1   | -0.922999381 |
| hsa-miR-193b   | DHFRL1   | -0.910742584 |
| hsa-miR-210    | DHFRL1   | -0.931899218 |
| hsa-miR-505    | DHFRL1   | -0.933640756 |
| hsa-miR-770-5p | DHFRL1   | -0.971109237 |
| hsa-miR-210    | FLJ20464 | -0.910182073 |
| hsa-miR-505    | FLJ20464 | -0.923984591 |
| hsa-miR-770-5p | FLJ20464 | -0.948237578 |
| hsa-miR-149    | LYSMD2   | -0.937464298 |
| hsa-miR-193b   | LYSMD2   | -0.931337872 |
| hsa-miR-210    | LYSMD2   | -0.943704474 |
| hsa-miR-505    | LYSMD2   | -0.949609298 |
| hsa-miR-770-5p | LYSMD2   | -0.951495217 |
| hsa-miR-149    | SCFD1    | -0.934737009 |
| hsa-miR-193b   | SCFD1    | -0.921266373 |
| hsa-miR-210    | SCFD1    | -0.94217339  |
| hsa-miR-365    | SCFD1    | -0.900382606 |
| hsa-miR-505    | SCFD1    | -0.941219843 |
| hsa-miR-770-5p | SCFD1    | -0.970021165 |
| hsa-miR-505    | OGFRL1   | -0.903007316 |
| hsa-miR-770-5p | OGFRL1   | -0.962536541 |
| hsa-miR-149    | NRXN1    | -0.936280149 |
| hsa-miR-193b   | NRXN1    | -0.937244726 |
| hsa-miR-210    | NRXN1    | -0.937066482 |
| hsa-miR-505    | NRXN1    | -0.923671606 |
| hsa-miR-770-5p | NRXN1    | -0.988857779 |
| hsa-miR-149    | PRRT2    | -0.952648754 |
| hsa-miR-193b   | PRRT2    | -0.934175054 |
| hsa-miR-210    | PRRT2    | -0.967602776 |
| hsa-miR-365    | PRRT2    | -0.919825306 |
| hsa-miR-505    | PRRT2    | -0.979916971 |
| hsa-miR-770-5p | PRRT2    | -0.937802642 |
| hsa-miR-149    | SPIRE1   | -0.912598613 |
| hsa-miR-193b   | SPIRE1   | -0.906290566 |
| hsa-miR-210    | SPIRE1   | -0.920121453 |
| hsa-miR-505    | SPIRE1   | -0.923693804 |
| hsa-miR-770-5p | SPIRE1   | -0.967791948 |

|                |          |              |
|----------------|----------|--------------|
| hsa-miR-149    | RNASET2  | -0.945254723 |
| hsa-miR-193b   | RNASET2  | -0.948796583 |
| hsa-miR-210    | RNASET2  | -0.949574343 |
| hsa-miR-505    | RNASET2  | -0.950289335 |
| hsa-miR-770-5p | RNASET2  | -0.957776575 |
| hsa-miR-149    | SNAPC3   | -0.946415064 |
| hsa-miR-193b   | SNAPC3   | -0.933861115 |
| hsa-miR-210    | SNAPC3   | -0.955147624 |
| hsa-miR-505    | SNAPC3   | -0.950729596 |
| hsa-miR-770-5p | SNAPC3   | -0.980987257 |
| hsa-miR-149    | ATP6V1C1 | -0.910771234 |
| hsa-miR-193b   | ATP6V1C1 | -0.918690262 |
| hsa-miR-210    | ATP6V1C1 | -0.920899313 |
| hsa-miR-505    | ATP6V1C1 | -0.927389188 |
| hsa-miR-770-5p | ATP6V1C1 | -0.947554817 |
| hsa-miR-149    | MECP2    | -0.920230915 |
| hsa-miR-193b   | MECP2    | -0.901970909 |
| hsa-miR-210    | MECP2    | -0.924103566 |
| hsa-miR-505    | MECP2    | -0.909097426 |
| hsa-miR-770-5p | MECP2    | -0.968915439 |
| hsa-miR-149    | RAPGEF2  | -0.958819396 |
| hsa-miR-193b   | RAPGEF2  | -0.957429371 |
| hsa-miR-210    | RAPGEF2  | -0.957310838 |
| hsa-miR-505    | RAPGEF2  | -0.94161333  |
| hsa-miR-770-5p | RAPGEF2  | -0.979320337 |
| hsa-miR-149    | SLC26A2  | -0.944939963 |
| hsa-miR-193b   | SLC26A2  | -0.941642183 |
| hsa-miR-210    | SLC26A2  | -0.950136454 |
| hsa-miR-505    | SLC26A2  | -0.948912517 |
| hsa-miR-770-5p | SLC26A2  | -0.971088731 |
| hsa-miR-210    | EIF4E3   | -0.910318212 |
| hsa-miR-505    | EIF4E3   | -0.925296297 |
| hsa-miR-770-5p | EIF4E3   | -0.940058203 |
| hsa-miR-149    | LIPH     | -0.911994529 |
| hsa-miR-193b   | LIPH     | -0.912872467 |
| hsa-miR-210    | LIPH     | -0.9248148   |
| hsa-miR-505    | LIPH     | -0.931691337 |
| hsa-miR-770-5p | LIPH     | -0.965018255 |
| hsa-miR-149    | AK4      | -0.928139556 |
| hsa-miR-193b   | AK4      | -0.938321461 |
| hsa-miR-210    | AK4      | -0.929304437 |
| hsa-miR-505    | AK4      | -0.918951214 |
| hsa-miR-770-5p | AK4      | -0.984631063 |
| hsa-miR-149    | NPY6R    | -0.925078482 |

|                |          |              |
|----------------|----------|--------------|
| hsa-miR-193b   | NPY6R    | -0.909747294 |
| hsa-miR-210    | NPY6R    | -0.933513404 |
| hsa-miR-505    | NPY6R    | -0.925165382 |
| hsa-miR-770-5p | NPY6R    | -0.984003719 |
| hsa-miR-210    | CLDN1    | -0.901887539 |
| hsa-miR-505    | CLDN1    | -0.912358353 |
| hsa-miR-770-5p | CLDN1    | -0.973457323 |
| hsa-miR-149    | NUDT6    | -0.945085528 |
| hsa-miR-193b   | NUDT6    | -0.953912847 |
| hsa-miR-210    | NUDT6    | -0.945522621 |
| hsa-miR-505    | NUDT6    | -0.940745429 |
| hsa-miR-770-5p | NUDT6    | -0.962946621 |
| hsa-miR-210    | LMO4     | -0.902680061 |
| hsa-miR-505    | LMO4     | -0.913680139 |
| hsa-miR-770-5p | LMO4     | -0.9653553   |
| hsa-miR-149    | OAS2     | -0.927019958 |
| hsa-miR-193b   | OAS2     | -0.924177155 |
| hsa-miR-210    | OAS2     | -0.92268769  |
| hsa-miR-770-5p | OAS2     | -0.979767536 |
| hsa-miR-505    | IL5RA    | -0.906817459 |
| hsa-miR-770-5p | IL5RA    | -0.92049303  |
| hsa-miR-149    | C19orf54 | -0.904015633 |
| hsa-miR-210    | C19orf54 | -0.927670454 |
| hsa-miR-505    | C19orf54 | -0.932581545 |
| hsa-miR-770-5p | C19orf54 | -0.966739603 |
| hsa-miR-149    | GLRX     | -0.920611955 |
| hsa-miR-193b   | GLRX     | -0.928032784 |
| hsa-miR-210    | GLRX     | -0.919945363 |
| hsa-miR-505    | GLRX     | -0.922543736 |
| hsa-miR-770-5p | GLRX     | -0.942208429 |
| hsa-miR-149    | CCDC14   | -0.928195556 |
| hsa-miR-193b   | CCDC14   | -0.918997125 |
| hsa-miR-210    | CCDC14   | -0.930805    |
| hsa-miR-505    | CCDC14   | -0.915034716 |
| hsa-miR-770-5p | CCDC14   | -0.985141603 |
| hsa-miR-149    | AKR1E2   | -0.929165606 |
| hsa-miR-193b   | AKR1E2   | -0.910681275 |
| hsa-miR-210    | AKR1E2   | -0.936816675 |
| hsa-miR-365    | AKR1E2   | -0.908582933 |
| hsa-miR-505    | AKR1E2   | -0.934309171 |
| hsa-miR-770-5p | AKR1E2   | -0.964981991 |
| hsa-miR-149    | MAP3K1   | -0.965595636 |
| hsa-miR-193b   | MAP3K1   | -0.959584855 |
| hsa-miR-210    | MAP3K1   | -0.961453805 |

|                |        |              |
|----------------|--------|--------------|
| hsa-miR-505    | MAP3K1 | -0.951761866 |
| hsa-miR-770-5p | MAP3K1 | -0.942416363 |
| hsa-miR-149    | TRIM7  | -0.948515543 |
| hsa-miR-193b   | TRIM7  | -0.93752639  |
| hsa-miR-210    | TRIM7  | -0.95783609  |
| hsa-miR-505    | TRIM7  | -0.95306348  |
| hsa-miR-770-5p | TRIM7  | -0.98289362  |
| hsa-miR-149    | RAB3A  | -0.92211368  |
| hsa-miR-193b   | RAB3A  | -0.917054348 |
| hsa-miR-210    | RAB3A  | -0.921872659 |
| hsa-miR-505    | RAB3A  | -0.914788969 |
| hsa-miR-770-5p | RAB3A  | -0.963543448 |
| hsa-miR-149    | PHKB   | -0.951732304 |
| hsa-miR-193b   | PHKB   | -0.961143932 |
| hsa-miR-210    | PHKB   | -0.948752248 |
| hsa-miR-505    | PHKB   | -0.937526881 |
| hsa-miR-770-5p | PHKB   | -0.970193688 |
| hsa-miR-149    | AIFM1  | -0.928453971 |
| hsa-miR-193b   | AIFM1  | -0.922908133 |
| hsa-miR-210    | AIFM1  | -0.936585168 |
| hsa-miR-505    | AIFM1  | -0.940170109 |
| hsa-miR-770-5p | AIFM1  | -0.969278719 |
| hsa-miR-149    | IFIH1  | -0.942219483 |
| hsa-miR-193b   | IFIH1  | -0.92716615  |
| hsa-miR-210    | IFIH1  | -0.960285548 |
| hsa-miR-505    | IFIH1  | -0.968095368 |
| hsa-miR-770-5p | IFIH1  | -0.955817901 |
| hsa-miR-149    | MTM1   | -0.950597157 |
| hsa-miR-193b   | MTM1   | -0.946525957 |
| hsa-miR-210    | MTM1   | -0.953933935 |
| hsa-miR-505    | MTM1   | -0.942259264 |
| hsa-miR-770-5p | MTM1   | -0.986361193 |
| hsa-miR-149    | CPNE8  | -0.929951821 |
| hsa-miR-193b   | CPNE8  | -0.94467671  |
| hsa-miR-210    | CPNE8  | -0.924208493 |
| hsa-miR-505    | CPNE8  | -0.923070678 |
| hsa-miR-770-5p | CPNE8  | -0.926475555 |
| hsa-miR-149    | QRICH2 | -0.942996075 |
| hsa-miR-193b   | QRICH2 | -0.948755747 |
| hsa-miR-210    | QRICH2 | -0.946883164 |
| hsa-miR-505    | QRICH2 | -0.93909077  |
| hsa-miR-770-5p | QRICH2 | -0.978511771 |
| hsa-miR-149    | C9orf9 | -0.942587938 |
| hsa-miR-193b   | C9orf9 | -0.943554789 |

|                |              |              |
|----------------|--------------|--------------|
| hsa-miR-210    | C9orf9       | -0.952239939 |
| hsa-miR-505    | C9orf9       | -0.952154877 |
| hsa-miR-770-5p | C9orf9       | -0.959391689 |
| hsa-miR-149    | SLFN5        | -0.93589942  |
| hsa-miR-193b   | SLFN5        | -0.919747142 |
| hsa-miR-210    | SLFN5        | -0.940523082 |
| hsa-miR-365    | SLFN5        | -0.911241736 |
| hsa-miR-505    | SLFN5        | -0.937531378 |
| hsa-miR-770-5p | SLFN5        | -0.956629204 |
| hsa-miR-149    | YRDC         | -0.926724614 |
| hsa-miR-193b   | YRDC         | -0.924339407 |
| hsa-miR-210    | YRDC         | -0.920601829 |
| hsa-miR-505    | YRDC         | -0.909248713 |
| hsa-miR-770-5p | YRDC         | -0.946303734 |
| hsa-miR-149    | SOSTDC1      | -0.915308026 |
| hsa-miR-210    | SOSTDC1      | -0.924258355 |
| hsa-miR-505    | SOSTDC1      | -0.925206589 |
| hsa-miR-770-5p | SOSTDC1      | -0.966936604 |
| hsa-miR-149    | TAZ          | -0.938107974 |
| hsa-miR-193b   | TAZ          | -0.936189248 |
| hsa-miR-210    | TAZ          | -0.944221108 |
| hsa-miR-505    | TAZ          | -0.94534466  |
| hsa-miR-770-5p | TAZ          | -0.969093606 |
| hsa-miR-149    | SDR16C5      | -0.950039654 |
| hsa-miR-193b   | SDR16C5      | -0.945585026 |
| hsa-miR-210    | SDR16C5      | -0.958612465 |
| hsa-miR-505    | SDR16C5      | -0.965603198 |
| hsa-miR-770-5p | SDR16C5      | -0.944646319 |
| hsa-miR-149    | HR           | -0.931936066 |
| hsa-miR-193b   | HR           | -0.915406446 |
| hsa-miR-210    | HR           | -0.94311264  |
| hsa-miR-505    | HR           | -0.930254993 |
| hsa-miR-770-5p | HR           | -0.98852292  |
| hsa-miR-149    | CPVL         | -0.945469138 |
| hsa-miR-193b   | CPVL         | -0.94389687  |
| hsa-miR-210    | CPVL         | -0.946378187 |
| hsa-miR-505    | CPVL         | -0.937218263 |
| hsa-miR-770-5p | CPVL         | -0.978207109 |
| hsa-miR-149    | HPRT1        | -0.936512571 |
| hsa-miR-193b   | HPRT1        | -0.91375821  |
| hsa-miR-210    | HPRT1        | -0.948320898 |
| hsa-miR-505    | HPRT1        | -0.938694136 |
| hsa-miR-770-5p | HPRT1        | -0.97915006  |
| hsa-miR-149    | LOC100507448 | -0.914503012 |

|                |              |              |
|----------------|--------------|--------------|
| hsa-miR-210    | LOC100507448 | -0.936867611 |
| hsa-miR-365    | LOC100507448 | -0.914296967 |
| hsa-miR-505    | LOC100507448 | -0.952794453 |
| hsa-miR-770-5p | LOC100507448 | -0.955941457 |
| hsa-miR-149    | SEMA4D       | -0.922154649 |
| hsa-miR-193b   | SEMA4D       | -0.908619553 |
| hsa-miR-210    | SEMA4D       | -0.943593796 |
| hsa-miR-505    | SEMA4D       | -0.953317716 |
| hsa-miR-770-5p | SEMA4D       | -0.950441533 |
| hsa-miR-149    | ABCC4        | -0.930848231 |
| hsa-miR-193b   | ABCC4        | -0.910926296 |
| hsa-miR-210    | ABCC4        | -0.948894722 |
| hsa-miR-505    | ABCC4        | -0.94631005  |
| hsa-miR-770-5p | ABCC4        | -0.980162656 |
| hsa-miR-149    | SYTL4        | -0.948856504 |
| hsa-miR-193b   | SYTL4        | -0.937808228 |
| hsa-miR-210    | SYTL4        | -0.960807311 |
| hsa-miR-365    | SYTL4        | -0.901097578 |
| hsa-miR-505    | SYTL4        | -0.972969068 |
| hsa-miR-770-5p | SYTL4        | -0.933251765 |
| hsa-miR-149    | ARSD         | -0.924454289 |
| hsa-miR-193b   | ARSD         | -0.918727658 |
| hsa-miR-210    | ARSD         | -0.939565915 |
| hsa-miR-505    | ARSD         | -0.952940676 |
| hsa-miR-770-5p | ARSD         | -0.944270546 |
| hsa-miR-149    | NSUN6        | -0.931152027 |
| hsa-miR-193b   | NSUN6        | -0.913986046 |
| hsa-miR-210    | NSUN6        | -0.950027531 |
| hsa-miR-505    | NSUN6        | -0.953037142 |
| hsa-miR-770-5p | NSUN6        | -0.974660036 |
| hsa-miR-149    | ZNF642       | -0.914530989 |
| hsa-miR-210    | ZNF642       | -0.916459907 |
| hsa-miR-505    | ZNF642       | -0.906765254 |
| hsa-miR-770-5p | ZNF642       | -0.948553197 |
| hsa-miR-149    | PKDCC        | -0.928721335 |
| hsa-miR-193b   | PKDCC        | -0.92387869  |
| hsa-miR-210    | PKDCC        | -0.936707654 |
| hsa-miR-505    | PKDCC        | -0.936507796 |
| hsa-miR-770-5p | PKDCC        | -0.979418729 |
| hsa-miR-149    | MUC1         | -0.917877382 |
| hsa-miR-193b   | MUC1         | -0.910615624 |
| hsa-miR-210    | MUC1         | -0.933574075 |
| hsa-miR-505    | MUC1         | -0.949113519 |
| hsa-miR-770-5p | MUC1         | -0.94444951  |



|                |              |              |
|----------------|--------------|--------------|
| hsa-miR-770-5p | C2orf81      | -0.913147892 |
| hsa-miR-149    | LOC100132735 | -0.958344698 |
| hsa-miR-193b   | LOC100132735 | -0.944010748 |
| hsa-miR-210    | LOC100132735 | -0.968813924 |
| hsa-miR-505    | LOC100132735 | -0.957181513 |
| hsa-miR-770-5p | LOC100132735 | -0.97721651  |
| hsa-miR-149    | SDHD         | -0.908473825 |
| hsa-miR-193b   | SDHD         | -0.908373035 |
| hsa-miR-210    | SDHD         | -0.920459931 |
| hsa-miR-505    | SDHD         | -0.933982341 |
| hsa-miR-770-5p | SDHD         | -0.945271489 |
| hsa-miR-149    | ACPL2        | -0.919619927 |
| hsa-miR-210    | ACPL2        | -0.939702071 |
| hsa-miR-505    | ACPL2        | -0.94600322  |
| hsa-miR-770-5p | ACPL2        | -0.976133868 |
| hsa-miR-149    | SLC22A3      | -0.944219332 |
| hsa-miR-193b   | SLC22A3      | -0.935825941 |
| hsa-miR-210    | SLC22A3      | -0.954243557 |
| hsa-miR-505    | SLC22A3      | -0.957369127 |
| hsa-miR-770-5p | SLC22A3      | -0.969389853 |
| hsa-miR-149    | ZNF334       | -0.922561797 |
| hsa-miR-193b   | ZNF334       | -0.919615649 |
| hsa-miR-210    | ZNF334       | -0.934206261 |
| hsa-miR-505    | ZNF334       | -0.94911085  |
| hsa-miR-770-5p | ZNF334       | -0.932594411 |
| hsa-miR-149    | PLEKHA2      | -0.934707768 |
| hsa-miR-193b   | PLEKHA2      | -0.922265734 |
| hsa-miR-210    | PLEKHA2      | -0.942423032 |
| hsa-miR-505    | PLEKHA2      | -0.941528985 |
| hsa-miR-770-5p | PLEKHA2      | -0.972545995 |
| hsa-miR-149    | SNX21        | -0.938490237 |
| hsa-miR-193b   | SNX21        | -0.916945813 |
| hsa-miR-210    | SNX21        | -0.952241639 |
| hsa-miR-505    | SNX21        | -0.938307116 |
| hsa-miR-770-5p | SNX21        | -0.97647359  |
| hsa-miR-149    | ITGAD        | -0.930381092 |
| hsa-miR-193b   | ITGAD        | -0.93499417  |
| hsa-miR-210    | ITGAD        | -0.939611259 |
| hsa-miR-505    | ITGAD        | -0.945711187 |
| hsa-miR-770-5p | ITGAD        | -0.94148168  |
| hsa-miR-149    | DTX3L        | -0.918611148 |
| hsa-miR-193b   | DTX3L        | -0.925851673 |
| hsa-miR-210    | DTX3L        | -0.923986666 |
| hsa-miR-505    | DTX3L        | -0.934959677 |

|                |        |              |
|----------------|--------|--------------|
| hsa-miR-770-5p | DTX3L  | -0.92324144  |
| hsa-miR-149    | WVOX   | -0.929357738 |
| hsa-miR-193b   | WVOX   | -0.909211208 |
| hsa-miR-210    | WVOX   | -0.946243342 |
| hsa-miR-505    | WVOX   | -0.939867447 |
| hsa-miR-770-5p | WVOX   | -0.982413302 |
| hsa-miR-149    | SYBU   | -0.942910112 |
| hsa-miR-193b   | SYBU   | -0.954190467 |
| hsa-miR-210    | SYBU   | -0.939698689 |
| hsa-miR-505    | SYBU   | -0.935096651 |
| hsa-miR-770-5p | SYBU   | -0.950657652 |
| hsa-miR-149    | NSMAF  | -0.911712337 |
| hsa-miR-193b   | NSMAF  | -0.9146175   |
| hsa-miR-210    | NSMAF  | -0.913349352 |
| hsa-miR-505    | NSMAF  | -0.92249721  |
| hsa-miR-770-5p | NSMAF  | -0.92442934  |
| hsa-miR-770-5p | TAF12  | -0.917280601 |
| hsa-miR-149    | BAG1   | -0.917668356 |
| hsa-miR-210    | BAG1   | -0.938099481 |
| hsa-miR-505    | BAG1   | -0.950946178 |
| hsa-miR-770-5p | BAG1   | -0.964023236 |
| hsa-miR-149    | PTPRN2 | -0.945935988 |
| hsa-miR-193b   | PTPRN2 | -0.949220925 |
| hsa-miR-210    | PTPRN2 | -0.952550618 |
| hsa-miR-505    | PTPRN2 | -0.955260408 |
| hsa-miR-770-5p | PTPRN2 | -0.9472726   |
| hsa-miR-149    | CISH   | -0.949982876 |
| hsa-miR-193b   | CISH   | -0.961763226 |
| hsa-miR-210    | CISH   | -0.947027512 |
| hsa-miR-505    | CISH   | -0.938071552 |
| hsa-miR-770-5p | CISH   | -0.96161165  |
| hsa-miR-149    | BMP2   | -0.949277452 |
| hsa-miR-193b   | BMP2   | -0.956271361 |
| hsa-miR-210    | BMP2   | -0.948370679 |
| hsa-miR-505    | BMP2   | -0.944534561 |
| hsa-miR-770-5p | BMP2   | -0.955786588 |
| hsa-miR-149    | MRPS21 | -0.939673348 |
| hsa-miR-193b   | MRPS21 | -0.932235122 |
| hsa-miR-210    | MRPS21 | -0.947378272 |
| hsa-miR-505    | MRPS21 | -0.952693711 |
| hsa-miR-770-5p | MRPS21 | -0.958155304 |
| hsa-miR-149    | PIGR   | -0.955494355 |
| hsa-miR-193b   | PIGR   | -0.949796013 |
| hsa-miR-210    | PIGR   | -0.959625842 |

|                |          |              |
|----------------|----------|--------------|
| hsa-miR-505    | PIGR     | -0.965051405 |
| hsa-miR-770-5p | PIGR     | -0.934003891 |
| hsa-miR-149    | C12orf24 | -0.907430553 |
| hsa-miR-210    | C12orf24 | -0.912664949 |
| hsa-miR-505    | C12orf24 | -0.910724261 |
| hsa-miR-770-5p | C12orf24 | -0.964257354 |
| hsa-miR-149    | NOXO1    | -0.942805728 |
| hsa-miR-193b   | NOXO1    | -0.942221719 |
| hsa-miR-210    | NOXO1    | -0.942120159 |
| hsa-miR-505    | NOXO1    | -0.930915949 |
| hsa-miR-770-5p | NOXO1    | -0.978045939 |
| hsa-miR-149    | GTPBP10  | -0.910417144 |
| hsa-miR-193b   | GTPBP10  | -0.908590538 |
| hsa-miR-210    | GTPBP10  | -0.928062216 |
| hsa-miR-505    | GTPBP10  | -0.937313042 |
| hsa-miR-770-5p | GTPBP10  | -0.936713604 |
| hsa-miR-149    | BPMS     | -0.973623717 |
| hsa-miR-193b   | BPMS     | -0.963798227 |
| hsa-miR-210    | BPMS     | -0.977213267 |
| hsa-miR-505    | BPMS     | -0.96336853  |
| hsa-miR-770-5p | BPMS     | -0.973243361 |
| hsa-miR-149    | TMC7     | -0.940065923 |
| hsa-miR-193b   | TMC7     | -0.930444541 |
| hsa-miR-210    | TMC7     | -0.949028762 |
| hsa-miR-505    | TMC7     | -0.935300982 |
| hsa-miR-770-5p | TMC7     | -0.991137796 |
| hsa-miR-149    | PSMB9    | -0.90339103  |
| hsa-miR-210    | PSMB9    | -0.924346471 |
| hsa-miR-505    | PSMB9    | -0.925475396 |
| hsa-miR-770-5p | PSMB9    | -0.978142918 |
| hsa-miR-149    | ARL3     | -0.922003715 |
| hsa-miR-193b   | ARL3     | -0.923329681 |
| hsa-miR-210    | ARL3     | -0.930865698 |
| hsa-miR-505    | ARL3     | -0.937938764 |
| hsa-miR-770-5p | ARL3     | -0.958814648 |
| hsa-miR-149    | PARP6    | -0.947739104 |
| hsa-miR-193b   | PARP6    | -0.955624061 |
| hsa-miR-210    | PARP6    | -0.948422455 |
| hsa-miR-505    | PARP6    | -0.942643239 |
| hsa-miR-770-5p | PARP6    | -0.966076708 |
| hsa-miR-149    | ATF7IP   | -0.943565356 |
| hsa-miR-193b   | ATF7IP   | -0.931846569 |
| hsa-miR-210    | ATF7IP   | -0.949555163 |
| hsa-miR-365    | ATF7IP   | -0.909563734 |

|                |              |              |
|----------------|--------------|--------------|
| hsa-miR-505    | ATF7IP       | -0.95276813  |
| hsa-miR-770-5p | ATF7IP       | -0.952707211 |
| hsa-miR-149    | FAM3D        | -0.939621081 |
| hsa-miR-193b   | FAM3D        | -0.925141669 |
| hsa-miR-210    | FAM3D        | -0.954782267 |
| hsa-miR-505    | FAM3D        | -0.956927003 |
| hsa-miR-770-5p | FAM3D        | -0.976993676 |
| hsa-miR-149    | LOC100507463 | -0.927415667 |
| hsa-miR-193b   | LOC100507463 | -0.903147776 |
| hsa-miR-210    | LOC100507463 | -0.94822311  |
| hsa-miR-505    | LOC100507463 | -0.94240299  |
| hsa-miR-770-5p | LOC100507463 | -0.962830098 |
| hsa-miR-149    | ATP7B        | -0.914345117 |
| hsa-miR-193b   | ATP7B        | -0.910996914 |
| hsa-miR-210    | ATP7B        | -0.92612771  |
| hsa-miR-505    | ATP7B        | -0.942690742 |
| hsa-miR-770-5p | ATP7B        | -0.931095194 |
| hsa-miR-149    | CREG2        | -0.943702242 |
| hsa-miR-193b   | CREG2        | -0.942956794 |
| hsa-miR-210    | CREG2        | -0.947074998 |
| hsa-miR-505    | CREG2        | -0.945617263 |
| hsa-miR-770-5p | CREG2        | -0.967088104 |
| hsa-miR-149    | SERPINB9     | -0.941737472 |
| hsa-miR-193b   | SERPINB9     | -0.939355783 |
| hsa-miR-210    | SERPINB9     | -0.947206018 |
| hsa-miR-505    | SERPINB9     | -0.945121759 |
| hsa-miR-770-5p | SERPINB9     | -0.975432869 |
| hsa-miR-149    | ACOT8        | -0.936900313 |
| hsa-miR-193b   | ACOT8        | -0.921377339 |
| hsa-miR-210    | ACOT8        | -0.946304598 |
| hsa-miR-505    | ACOT8        | -0.944020798 |
| hsa-miR-770-5p | ACOT8        | -0.976730478 |
| hsa-miR-149    | PRSS2        | -0.902945327 |
| hsa-miR-210    | PRSS2        | -0.916108712 |
| hsa-miR-505    | PRSS2        | -0.91841881  |
| hsa-miR-770-5p | PRSS2        | -0.977474977 |
| hsa-miR-149    | ANKS4B       | -0.926380843 |
| hsa-miR-193b   | ANKS4B       | -0.921103712 |
| hsa-miR-210    | ANKS4B       | -0.939926761 |
| hsa-miR-505    | ANKS4B       | -0.948182227 |
| hsa-miR-770-5p | ANKS4B       | -0.963476388 |
| hsa-miR-149    | SLC33A1      | -0.951058627 |
| hsa-miR-193b   | SLC33A1      | -0.943537953 |
| hsa-miR-210    | SLC33A1      | -0.955056701 |

|                |          |              |
|----------------|----------|--------------|
| hsa-miR-505    | SLC33A1  | -0.945976973 |
| hsa-miR-770-5p | SLC33A1  | -0.981127367 |
| hsa-miR-149    | VGLL3    | -0.946638632 |
| hsa-miR-193b   | VGLL3    | -0.933314926 |
| hsa-miR-210    | VGLL3    | -0.956104048 |
| hsa-miR-365    | VGLL3    | -0.905689607 |
| hsa-miR-505    | VGLL3    | -0.958896744 |
| hsa-miR-770-5p | VGLL3    | -0.965651444 |
| hsa-miR-149    | XPNPEP3  | -0.931537469 |
| hsa-miR-193b   | XPNPEP3  | -0.9148244   |
| hsa-miR-210    | XPNPEP3  | -0.951247741 |
| hsa-miR-505    | XPNPEP3  | -0.958242587 |
| hsa-miR-770-5p | XPNPEP3  | -0.966328375 |
| hsa-miR-149    | ARHGAP18 | -0.933911523 |
| hsa-miR-193b   | ARHGAP18 | -0.910134742 |
| hsa-miR-210    | ARHGAP18 | -0.946332691 |
| hsa-miR-365    | ARHGAP18 | -0.912178657 |
| hsa-miR-505    | ARHGAP18 | -0.943909068 |
| hsa-miR-770-5p | ARHGAP18 | -0.971808937 |
| hsa-miR-149    | LAMC2    | -0.941656812 |
| hsa-miR-193b   | LAMC2    | -0.931795725 |
| hsa-miR-210    | LAMC2    | -0.949564222 |
| hsa-miR-505    | LAMC2    | -0.952702241 |
| hsa-miR-770-5p | LAMC2    | -0.964016112 |
| hsa-miR-149    | SCPEP1   | -0.933700233 |
| hsa-miR-193b   | SCPEP1   | -0.933955732 |
| hsa-miR-210    | SCPEP1   | -0.944645025 |
| hsa-miR-505    | SCPEP1   | -0.954968804 |
| hsa-miR-770-5p | SCPEP1   | -0.92971415  |
| hsa-miR-149    | NCBP1    | -0.917443777 |
| hsa-miR-193b   | NCBP1    | -0.904267063 |
| hsa-miR-210    | NCBP1    | -0.931750725 |
| hsa-miR-505    | NCBP1    | -0.938957294 |
| hsa-miR-770-5p | NCBP1    | -0.972966149 |
| hsa-miR-149    | ACADSB   | -0.931802028 |
| hsa-miR-193b   | ACADSB   | -0.926214407 |
| hsa-miR-210    | ACADSB   | -0.937393908 |
| hsa-miR-505    | ACADSB   | -0.931505304 |
| hsa-miR-770-5p | ACADSB   | -0.984582543 |
| hsa-miR-149    | PVR      | -0.935443194 |
| hsa-miR-193b   | PVR      | -0.926350812 |
| hsa-miR-210    | PVR      | -0.948653663 |
| hsa-miR-505    | PVR      | -0.94502457  |
| hsa-miR-770-5p | PVR      | -0.984799609 |

|                |          |              |
|----------------|----------|--------------|
| hsa-miR-149    | PELI1    | -0.95496155  |
| hsa-miR-193b   | PELI1    | -0.949091244 |
| hsa-miR-210    | PELI1    | -0.956992044 |
| hsa-miR-505    | PELI1    | -0.939153232 |
| hsa-miR-770-5p | PELI1    | -0.986859975 |
| hsa-miR-149    | ZNF585A  | -0.962889123 |
| hsa-miR-193b   | ZNF585A  | -0.958849872 |
| hsa-miR-210    | ZNF585A  | -0.95974337  |
| hsa-miR-505    | ZNF585A  | -0.945886833 |
| hsa-miR-770-5p | ZNF585A  | -0.964566439 |
| hsa-miR-149    | SLC22A25 | -0.938711329 |
| hsa-miR-193b   | SLC22A25 | -0.922977562 |
| hsa-miR-210    | SLC22A25 | -0.947350872 |
| hsa-miR-505    | SLC22A25 | -0.943709409 |
| hsa-miR-770-5p | SLC22A25 | -0.976401311 |
| hsa-miR-149    | CYP2B6   | -0.951269434 |
| hsa-miR-193b   | CYP2B6   | -0.942285868 |
| hsa-miR-210    | CYP2B6   | -0.963805386 |
| hsa-miR-505    | CYP2B6   | -0.964597725 |
| hsa-miR-770-5p | CYP2B6   | -0.967751538 |
| hsa-miR-149    | PPAPDC1B | -0.943611683 |
| hsa-miR-193b   | PPAPDC1B | -0.946593795 |
| hsa-miR-210    | PPAPDC1B | -0.938315949 |
| hsa-miR-505    | PPAPDC1B | -0.918192426 |
| hsa-miR-770-5p | PPAPDC1B | -0.980130983 |
| hsa-miR-149    | WWC3     | -0.901167335 |
| hsa-miR-210    | WWC3     | -0.921768719 |
| hsa-miR-505    | WWC3     | -0.915957009 |
| hsa-miR-770-5p | WWC3     | -0.97741716  |
| hsa-miR-149    | IGSF10   | -0.908052925 |
| hsa-miR-193b   | IGSF10   | -0.905843282 |
| hsa-miR-210    | IGSF10   | -0.917521836 |
| hsa-miR-505    | IGSF10   | -0.923794203 |
| hsa-miR-770-5p | IGSF10   | -0.968742453 |
| hsa-miR-149    | TRMT11   | -0.935185318 |
| hsa-miR-193b   | TRMT11   | -0.930267397 |
| hsa-miR-210    | TRMT11   | -0.940499469 |
| hsa-miR-505    | TRMT11   | -0.931801703 |
| hsa-miR-770-5p | TRMT11   | -0.988895782 |
| hsa-miR-149    | CXCL11   | -0.91854712  |
| hsa-miR-210    | CXCL11   | -0.941280528 |
| hsa-miR-365    | CXCL11   | -0.905601683 |
| hsa-miR-505    | CXCL11   | -0.949095916 |
| hsa-miR-770-5p | CXCL11   | -0.968765459 |

|                |         |              |
|----------------|---------|--------------|
| hsa-miR-149    | ADRB1   | -0.937588907 |
| hsa-miR-193b   | ADRB1   | -0.912262821 |
| hsa-miR-210    | ADRB1   | -0.948918073 |
| hsa-miR-365    | ADRB1   | -0.915446063 |
| hsa-miR-505    | ADRB1   | -0.944136706 |
| hsa-miR-770-5p | ADRB1   | -0.96816707  |
| hsa-miR-149    | TNNT1   | -0.916938217 |
| hsa-miR-210    | TNNT1   | -0.932949493 |
| hsa-miR-505    | TNNT1   | -0.932989624 |
| hsa-miR-770-5p | TNNT1   | -0.982361543 |
| hsa-miR-149    | FZD2    | -0.915697143 |
| hsa-miR-193b   | FZD2    | -0.92469168  |
| hsa-miR-210    | FZD2    | -0.906715485 |
| hsa-miR-505    | FZD2    | -0.900006687 |
| hsa-miR-770-5p | FZD2    | -0.931501722 |
| hsa-miR-149    | SNX10   | -0.950104766 |
| hsa-miR-193b   | SNX10   | -0.92023682  |
| hsa-miR-210    | SNX10   | -0.967855072 |
| hsa-miR-365    | SNX10   | -0.919038509 |
| hsa-miR-505    | SNX10   | -0.967260189 |
| hsa-miR-770-5p | SNX10   | -0.962180819 |
| hsa-miR-149    | FAR2    | -0.913617287 |
| hsa-miR-193b   | FAR2    | -0.916967442 |
| hsa-miR-210    | FAR2    | -0.922107204 |
| hsa-miR-505    | FAR2    | -0.923214395 |
| hsa-miR-770-5p | FAR2    | -0.977668357 |
| hsa-miR-149    | PLIN2   | -0.934774409 |
| hsa-miR-193b   | PLIN2   | -0.931150742 |
| hsa-miR-210    | PLIN2   | -0.945244889 |
| hsa-miR-505    | PLIN2   | -0.940568078 |
| hsa-miR-770-5p | PLIN2   | -0.985640687 |
| hsa-miR-149    | PI3     | -0.93892634  |
| hsa-miR-193b   | PI3     | -0.910140479 |
| hsa-miR-210    | PI3     | -0.946150941 |
| hsa-miR-365    | PI3     | -0.932129496 |
| hsa-miR-505    | PI3     | -0.940189116 |
| hsa-miR-770-5p | PI3     | -0.942225677 |
| hsa-miR-149    | PLEKHM3 | -0.964427832 |
| hsa-miR-193b   | PLEKHM3 | -0.969155455 |
| hsa-miR-210    | PLEKHM3 | -0.96274912  |
| hsa-miR-505    | PLEKHM3 | -0.958025418 |
| hsa-miR-770-5p | PLEKHM3 | -0.945168767 |
| hsa-miR-770-5p | MBNL3   | -0.903323179 |
| hsa-miR-149    | CD44    | -0.946591087 |

|                |         |              |
|----------------|---------|--------------|
| hsa-miR-193b   | CD44    | -0.929597512 |
| hsa-miR-210    | CD44    | -0.954367117 |
| hsa-miR-505    | CD44    | -0.942973607 |
| hsa-miR-770-5p | CD44    | -0.981354294 |
| hsa-miR-149    | FANCI   | -0.920513703 |
| hsa-miR-193b   | FANCI   | -0.91820147  |
| hsa-miR-210    | FANCI   | -0.926442606 |
| hsa-miR-505    | FANCI   | -0.919007171 |
| hsa-miR-770-5p | FANCI   | -0.99100067  |
| hsa-miR-149    | CAPNS1  | -0.932805761 |
| hsa-miR-193b   | CAPNS1  | -0.937001382 |
| hsa-miR-210    | CAPNS1  | -0.940652172 |
| hsa-miR-505    | CAPNS1  | -0.946607306 |
| hsa-miR-770-5p | CAPNS1  | -0.946317554 |
| hsa-miR-149    | FAM174B | -0.939551506 |
| hsa-miR-193b   | FAM174B | -0.921181459 |
| hsa-miR-210    | FAM174B | -0.953145916 |
| hsa-miR-505    | FAM174B | -0.94473471  |
| hsa-miR-770-5p | FAM174B | -0.98430739  |
| hsa-miR-505    | TCEA3   | -0.915520866 |
| hsa-miR-149    | C8orf33 | -0.948966468 |
| hsa-miR-193b   | C8orf33 | -0.923127501 |
| hsa-miR-210    | C8orf33 | -0.963398684 |
| hsa-miR-365    | C8orf33 | -0.920786311 |
| hsa-miR-505    | C8orf33 | -0.962674623 |
| hsa-miR-770-5p | C8orf33 | -0.967446125 |
| hsa-miR-149    | XAF1    | -0.973521795 |
| hsa-miR-193b   | XAF1    | -0.973349132 |
| hsa-miR-210    | XAF1    | -0.973048674 |
| hsa-miR-505    | XAF1    | -0.962424189 |
| hsa-miR-770-5p | XAF1    | -0.963654143 |
| hsa-miR-149    | WFDC2   | -0.934712298 |
| hsa-miR-193b   | WFDC2   | -0.931087207 |
| hsa-miR-210    | WFDC2   | -0.94146097  |
| hsa-miR-505    | WFDC2   | -0.939624338 |
| hsa-miR-770-5p | WFDC2   | -0.979613243 |
| hsa-miR-149    | PSME2   | -0.927259639 |
| hsa-miR-193b   | PSME2   | -0.912260013 |
| hsa-miR-210    | PSME2   | -0.947696528 |
| hsa-miR-505    | PSME2   | -0.948304926 |
| hsa-miR-770-5p | PSME2   | -0.953609242 |
| hsa-miR-149    | HSPA12A | -0.927792122 |
| hsa-miR-193b   | HSPA12A | -0.927421421 |
| hsa-miR-210    | HSPA12A | -0.935964917 |



|                |              |              |
|----------------|--------------|--------------|
| hsa-miR-505    | HSPA12A      | -0.943917391 |
| hsa-miR-770-5p | HSPA12A      | -0.953023881 |
| hsa-miR-149    | GMDS         | -0.910941479 |
| hsa-miR-210    | GMDS         | -0.922888667 |
| hsa-miR-505    | GMDS         | -0.929581035 |
| hsa-miR-770-5p | GMDS         | -0.967851074 |
| hsa-miR-149    | SULF2        | -0.914638675 |
| hsa-miR-193b   | SULF2        | -0.928120667 |
| hsa-miR-210    | SULF2        | -0.918115774 |
| hsa-miR-505    | SULF2        | -0.923054223 |
| hsa-miR-770-5p | SULF2        | -0.938590621 |
| hsa-miR-149    | FAM125A      | -0.928850165 |
| hsa-miR-193b   | FAM125A      | -0.924847843 |
| hsa-miR-210    | FAM125A      | -0.927208676 |
| hsa-miR-505    | FAM125A      | -0.912659413 |
| hsa-miR-770-5p | FAM125A      | -0.97574646  |
| hsa-miR-149    | LOC100129034 | -0.94845852  |
| hsa-miR-193b   | LOC100129034 | -0.937098744 |
| hsa-miR-210    | LOC100129034 | -0.956682358 |
| hsa-miR-505    | LOC100129034 | -0.947446532 |
| hsa-miR-770-5p | LOC100129034 | -0.986680272 |
| hsa-miR-210    | CABLES1      | -0.901018898 |
| hsa-miR-505    | CABLES1      | -0.913387367 |
| hsa-miR-770-5p | CABLES1      | -0.941258463 |
| hsa-miR-149    | FRY          | -0.958218897 |
| hsa-miR-193b   | FRY          | -0.941467966 |
| hsa-miR-210    | FRY          | -0.969471306 |
| hsa-miR-505    | FRY          | -0.96219203  |
| hsa-miR-770-5p | FRY          | -0.977487928 |
| hsa-miR-149    | TRIP6        | -0.937059107 |
| hsa-miR-193b   | TRIP6        | -0.928642045 |
| hsa-miR-210    | TRIP6        | -0.94833769  |
| hsa-miR-505    | TRIP6        | -0.95057669  |
| hsa-miR-770-5p | TRIP6        | -0.976532486 |
| hsa-miR-149    | C1orf59      | -0.938415643 |
| hsa-miR-193b   | C1orf59      | -0.93679842  |
| hsa-miR-210    | C1orf59      | -0.942563649 |
| hsa-miR-505    | C1orf59      | -0.925430239 |
| hsa-miR-770-5p | C1orf59      | -0.994797616 |
| hsa-miR-149    | PDK3         | -0.934085922 |
| hsa-miR-193b   | PDK3         | -0.924499914 |
| hsa-miR-210    | PDK3         | -0.943974896 |
| hsa-miR-505    | PDK3         | -0.946538218 |
| hsa-miR-770-5p | PDK3         | -0.973889876 |

|                |           |              |
|----------------|-----------|--------------|
| hsa-miR-149    | ANKRD27   | -0.923764677 |
| hsa-miR-193b   | ANKRD27   | -0.940230483 |
| hsa-miR-210    | ANKRD27   | -0.923878334 |
| hsa-miR-505    | ANKRD27   | -0.923693382 |
| hsa-miR-770-5p | ANKRD27   | -0.941488352 |
| hsa-miR-149    | C6orf150  | -0.940843647 |
| hsa-miR-193b   | C6orf150  | -0.942175738 |
| hsa-miR-210    | C6orf150  | -0.945268534 |
| hsa-miR-505    | C6orf150  | -0.942457961 |
| hsa-miR-770-5p | C6orf150  | -0.974672727 |
| hsa-miR-210    | ALDH6A1   | -0.91439206  |
| hsa-miR-505    | ALDH6A1   | -0.915244027 |
| hsa-miR-770-5p | ALDH6A1   | -0.952169225 |
| hsa-miR-149    | PMAIP1    | -0.911634823 |
| hsa-miR-193b   | PMAIP1    | -0.908975426 |
| hsa-miR-210    | PMAIP1    | -0.925466943 |
| hsa-miR-505    | PMAIP1    | -0.93721646  |
| hsa-miR-770-5p | PMAIP1    | -0.956123521 |
| hsa-miR-149    | GPX8      | -0.900741667 |
| hsa-miR-210    | GPX8      | -0.92043513  |
| hsa-miR-505    | GPX8      | -0.935084226 |
| hsa-miR-770-5p | GPX8      | -0.940390268 |
| hsa-miR-149    | LOC728192 | -0.923165015 |
| hsa-miR-210    | LOC728192 | -0.940834211 |
| hsa-miR-365    | LOC728192 | -0.904332904 |
| hsa-miR-505    | LOC728192 | -0.943232535 |
| hsa-miR-770-5p | LOC728192 | -0.97576186  |
| hsa-miR-149    | SERPINB1  | -0.93446387  |
| hsa-miR-193b   | SERPINB1  | -0.920194513 |
| hsa-miR-210    | SERPINB1  | -0.949380599 |
| hsa-miR-505    | SERPINB1  | -0.958541232 |
| hsa-miR-770-5p | SERPINB1  | -0.963535633 |
| hsa-miR-149    | RBMX2     | -0.923165279 |
| hsa-miR-193b   | RBMX2     | -0.907864703 |
| hsa-miR-210    | RBMX2     | -0.944475762 |
| hsa-miR-505    | RBMX2     | -0.952346645 |
| hsa-miR-770-5p | RBMX2     | -0.960818748 |
| hsa-miR-149    | MX1       | -0.934899503 |
| hsa-miR-193b   | MX1       | -0.935502429 |
| hsa-miR-210    | MX1       | -0.93530233  |
| hsa-miR-505    | MX1       | -0.930171868 |
| hsa-miR-770-5p | MX1       | -0.969320126 |
| hsa-miR-210    | PM20D2    | -0.901622141 |
| hsa-miR-505    | PM20D2    | -0.904193739 |

|                |         |              |
|----------------|---------|--------------|
| hsa-miR-770-5p | PM20D2  | -0.975744446 |
| hsa-miR-149    | GBP3    | -0.946432218 |
| hsa-miR-193b   | GBP3    | -0.95423599  |
| hsa-miR-210    | GBP3    | -0.950029634 |
| hsa-miR-505    | GBP3    | -0.943788582 |
| hsa-miR-770-5p | GBP3    | -0.965621259 |
| hsa-miR-149    | ZNF747  | -0.923572761 |
| hsa-miR-193b   | ZNF747  | -0.923551341 |
| hsa-miR-210    | ZNF747  | -0.929078696 |
| hsa-miR-505    | ZNF747  | -0.921549612 |
| hsa-miR-770-5p | ZNF747  | -0.990886438 |
| hsa-miR-149    | TCEAL1  | -0.922710112 |
| hsa-miR-193b   | TCEAL1  | -0.911749184 |
| hsa-miR-210    | TCEAL1  | -0.942424967 |
| hsa-miR-505    | TCEAL1  | -0.94670198  |
| hsa-miR-770-5p | TCEAL1  | -0.95806279  |
| hsa-miR-149    | ZNF91   | -0.941554662 |
| hsa-miR-193b   | ZNF91   | -0.933518344 |
| hsa-miR-210    | ZNF91   | -0.953245765 |
| hsa-miR-505    | ZNF91   | -0.952105935 |
| hsa-miR-770-5p | ZNF91   | -0.98048828  |
| hsa-miR-149    | SLCO3A1 | -0.940878941 |
| hsa-miR-193b   | SLCO3A1 | -0.929228423 |
| hsa-miR-210    | SLCO3A1 | -0.942630337 |
| hsa-miR-365    | SLCO3A1 | -0.904798204 |
| hsa-miR-505    | SLCO3A1 | -0.938563679 |
| hsa-miR-770-5p | SLCO3A1 | -0.953710025 |
| hsa-miR-149    | ZDHHC1  | -0.932288366 |
| hsa-miR-193b   | ZDHHC1  | -0.922963192 |
| hsa-miR-210    | ZDHHC1  | -0.947148892 |
| hsa-miR-505    | ZDHHC1  | -0.960327202 |
| hsa-miR-770-5p | ZDHHC1  | -0.946194422 |
| hsa-miR-149    | ADSSL1  | -0.907677114 |
| hsa-miR-193b   | ADSSL1  | -0.906210482 |
| hsa-miR-210    | ADSSL1  | -0.919544682 |
| hsa-miR-505    | ADSSL1  | -0.927354129 |
| hsa-miR-770-5p | ADSSL1  | -0.968467282 |
| hsa-miR-149    | USP4    | -0.93185896  |
| hsa-miR-193b   | USP4    | -0.923056208 |
| hsa-miR-210    | USP4    | -0.943937091 |
| hsa-miR-505    | USP4    | -0.943841017 |
| hsa-miR-770-5p | USP4    | -0.983669267 |
| hsa-miR-149    | PLAC4   | -0.946393679 |
| hsa-miR-193b   | PLAC4   | -0.958488824 |

|                |              |              |
|----------------|--------------|--------------|
| hsa-miR-210    | PLAC4        | -0.942853427 |
| hsa-miR-505    | PLAC4        | -0.937030955 |
| hsa-miR-770-5p | PLAC4        | -0.950909857 |
| hsa-miR-149    | C5orf13      | -0.906034062 |
| hsa-miR-193b   | C5orf13      | -0.911517112 |
| hsa-miR-210    | C5orf13      | -0.905558009 |
| hsa-miR-505    | C5orf13      | -0.916185345 |
| hsa-miR-770-5p | C5orf13      | -0.904982113 |
| hsa-miR-149    | FAM105A      | -0.909793674 |
| hsa-miR-210    | FAM105A      | -0.923253641 |
| hsa-miR-505    | FAM105A      | -0.934102214 |
| hsa-miR-770-5p | FAM105A      | -0.959285368 |
| hsa-miR-149    | TUBB4Q       | -0.942961413 |
| hsa-miR-193b   | TUBB4Q       | -0.936705518 |
| hsa-miR-210    | TUBB4Q       | -0.945738188 |
| hsa-miR-505    | TUBB4Q       | -0.935426821 |
| hsa-miR-770-5p | TUBB4Q       | -0.982305766 |
| hsa-miR-149    | MAP7         | -0.934404183 |
| hsa-miR-193b   | MAP7         | -0.930983505 |
| hsa-miR-210    | MAP7         | -0.942075934 |
| hsa-miR-505    | MAP7         | -0.951959564 |
| hsa-miR-770-5p | MAP7         | -0.941142821 |
| hsa-miR-149    | EREG         | -0.935340935 |
| hsa-miR-193b   | EREG         | -0.918122392 |
| hsa-miR-210    | EREG         | -0.952201182 |
| hsa-miR-505    | EREG         | -0.955046751 |
| hsa-miR-770-5p | EREG         | -0.977190862 |
| hsa-miR-505    | RETSAT       | -0.916263449 |
| hsa-miR-770-5p | RETSAT       | -0.922503891 |
| hsa-miR-149    | HOPX         | -0.948031286 |
| hsa-miR-193b   | HOPX         | -0.955164935 |
| hsa-miR-210    | HOPX         | -0.95010936  |
| hsa-miR-505    | HOPX         | -0.944306963 |
| hsa-miR-770-5p | HOPX         | -0.968059262 |
| hsa-miR-505    | LOC100288911 | -0.900839701 |
| hsa-miR-770-5p | LOC100288911 | -0.949677526 |
| hsa-miR-149    | CPM          | -0.949678019 |
| hsa-miR-193b   | CPM          | -0.946277735 |
| hsa-miR-210    | CPM          | -0.956751704 |
| hsa-miR-505    | CPM          | -0.966419673 |
| hsa-miR-770-5p | CPM          | -0.923849289 |
| hsa-miR-149    | FLJ32955     | -0.91703211  |
| hsa-miR-193b   | FLJ32955     | -0.918770777 |
| hsa-miR-210    | FLJ32955     | -0.926189275 |

|                |              |              |
|----------------|--------------|--------------|
| hsa-miR-505    | FLJ32955     | -0.940027054 |
| hsa-miR-770-5p | FLJ32955     | -0.929542481 |
| hsa-miR-149    | RAD54B       | -0.930648587 |
| hsa-miR-193b   | RAD54B       | -0.910100862 |
| hsa-miR-210    | RAD54B       | -0.949611556 |
| hsa-miR-505    | RAD54B       | -0.950145445 |
| hsa-miR-770-5p | RAD54B       | -0.977833635 |
| hsa-miR-149    | FLJ21408     | -0.938899715 |
| hsa-miR-193b   | FLJ21408     | -0.933128373 |
| hsa-miR-210    | FLJ21408     | -0.94112     |
| hsa-miR-505    | FLJ21408     | -0.931093883 |
| hsa-miR-770-5p | FLJ21408     | -0.980781174 |
| hsa-miR-149    | LOC100506517 | -0.914087809 |
| hsa-miR-193b   | LOC100506517 | -0.904322363 |
| hsa-miR-210    | LOC100506517 | -0.925960964 |
| hsa-miR-505    | LOC100506517 | -0.932971871 |
| hsa-miR-770-5p | LOC100506517 | -0.96984251  |
| hsa-miR-149    | CSPP1        | -0.911478843 |
| hsa-miR-210    | CSPP1        | -0.928612789 |
| hsa-miR-365    | CSPP1        | -0.926328763 |
| hsa-miR-505    | CSPP1        | -0.940406687 |
| hsa-miR-770-5p | CSPP1        | -0.952236658 |
| hsa-miR-149    | FAM81B       | -0.957573891 |
| hsa-miR-193b   | FAM81B       | -0.948801886 |
| hsa-miR-210    | FAM81B       | -0.966819402 |
| hsa-miR-505    | FAM81B       | -0.96475763  |
| hsa-miR-770-5p | FAM81B       | -0.972809359 |
| hsa-miR-149    | HGSNAT       | -0.952837417 |
| hsa-miR-193b   | HGSNAT       | -0.939095057 |
| hsa-miR-210    | HGSNAT       | -0.961340594 |
| hsa-miR-365    | HGSNAT       | -0.903449317 |
| hsa-miR-505    | HGSNAT       | -0.959854691 |
| hsa-miR-770-5p | HGSNAT       | -0.971393073 |
| hsa-miR-149    | ZNF185       | -0.941804236 |
| hsa-miR-193b   | ZNF185       | -0.920275245 |
| hsa-miR-210    | ZNF185       | -0.942540879 |
| hsa-miR-365    | ZNF185       | -0.926075301 |
| hsa-miR-505    | ZNF185       | -0.935632665 |
| hsa-miR-770-5p | ZNF185       | -0.927959137 |
| hsa-miR-770-5p | ZNF548       | -0.900965325 |
| hsa-miR-149    | NBN          | -0.90539305  |
| hsa-miR-210    | NBN          | -0.925793738 |
| hsa-miR-505    | NBN          | -0.942185222 |
| hsa-miR-770-5p | NBN          | -0.95773515  |

|                |              |              |
|----------------|--------------|--------------|
| hsa-miR-149    | CYB5D2       | -0.91373108  |
| hsa-miR-193b   | CYB5D2       | -0.921993627 |
| hsa-miR-210    | CYB5D2       | -0.920021278 |
| hsa-miR-505    | CYB5D2       | -0.92878156  |
| hsa-miR-770-5p | CYB5D2       | -0.939381969 |
| hsa-miR-210    | IFI44L       | -0.914143559 |
| hsa-miR-505    | IFI44L       | -0.908380918 |
| hsa-miR-770-5p | IFI44L       | -0.977155836 |
| hsa-miR-770-5p | GPC1         | -0.938398955 |
| hsa-miR-149    | CNNM2        | -0.90201214  |
| hsa-miR-193b   | CNNM2        | -0.913731928 |
| hsa-miR-505    | CNNM2        | -0.90780455  |
| hsa-miR-770-5p | CNNM2        | -0.911247148 |
| hsa-miR-149    | SYTL5        | -0.94430909  |
| hsa-miR-193b   | SYTL5        | -0.912057029 |
| hsa-miR-210    | SYTL5        | -0.966069192 |
| hsa-miR-365    | SYTL5        | -0.904581026 |
| hsa-miR-505    | SYTL5        | -0.966249709 |
| hsa-miR-770-5p | SYTL5        | -0.952413102 |
| hsa-miR-149    | LARP4B       | -0.949137401 |
| hsa-miR-193b   | LARP4B       | -0.944232714 |
| hsa-miR-210    | LARP4B       | -0.954864134 |
| hsa-miR-505    | LARP4B       | -0.958000478 |
| hsa-miR-770-5p | LARP4B       | -0.955863586 |
| hsa-miR-149    | DHRS12       | -0.931488673 |
| hsa-miR-193b   | DHRS12       | -0.91465832  |
| hsa-miR-210    | DHRS12       | -0.93924433  |
| hsa-miR-365    | DHRS12       | -0.911029953 |
| hsa-miR-505    | DHRS12       | -0.939777194 |
| hsa-miR-770-5p | DHRS12       | -0.961572247 |
| hsa-miR-149    | HEBP2        | -0.962884005 |
| hsa-miR-193b   | HEBP2        | -0.965803971 |
| hsa-miR-210    | HEBP2        | -0.963698626 |
| hsa-miR-505    | HEBP2        | -0.960742179 |
| hsa-miR-770-5p | HEBP2        | -0.949093215 |
| hsa-miR-149    | LOC100499466 | -0.918800602 |
| hsa-miR-193b   | LOC100499466 | -0.936784424 |
| hsa-miR-210    | LOC100499466 | -0.914459745 |
| hsa-miR-505    | LOC100499466 | -0.912084291 |
| hsa-miR-770-5p | LOC100499466 | -0.941553113 |
| hsa-miR-149    | HOXD10       | -0.959383341 |
| hsa-miR-193b   | HOXD10       | -0.939455437 |
| hsa-miR-210    | HOXD10       | -0.974381799 |
| hsa-miR-365    | HOXD10       | -0.917317466 |

|                |           |              |
|----------------|-----------|--------------|
| hsa-miR-505    | HOXD10    | -0.981369477 |
| hsa-miR-770-5p | HOXD10    | -0.951094529 |
| hsa-miR-149    | COPS8     | -0.929955785 |
| hsa-miR-193b   | COPS8     | -0.919147178 |
| hsa-miR-210    | COPS8     | -0.936859777 |
| hsa-miR-365    | COPS8     | -0.900540939 |
| hsa-miR-505    | COPS8     | -0.940742987 |
| hsa-miR-770-5p | COPS8     | -0.958182767 |
| hsa-miR-149    | HIST1H2BK | -0.96986917  |
| hsa-miR-193b   | HIST1H2BK | -0.961931906 |
| hsa-miR-210    | HIST1H2BK | -0.976845695 |
| hsa-miR-505    | HIST1H2BK | -0.972843794 |
| hsa-miR-770-5p | HIST1H2BK | -0.96396771  |
| hsa-miR-149    | NTF4      | -0.936108964 |
| hsa-miR-193b   | NTF4      | -0.92276621  |
| hsa-miR-210    | NTF4      | -0.95504684  |
| hsa-miR-505    | NTF4      | -0.960888845 |
| hsa-miR-770-5p | NTF4      | -0.954003098 |
| hsa-miR-149    | KIAA0020  | -0.960251285 |
| hsa-miR-193b   | KIAA0020  | -0.955474031 |
| hsa-miR-210    | KIAA0020  | -0.963905892 |
| hsa-miR-505    | KIAA0020  | -0.964177325 |
| hsa-miR-770-5p | KIAA0020  | -0.952482486 |
| hsa-miR-149    | PRKAG2    | -0.921087747 |
| hsa-miR-210    | PRKAG2    | -0.933688309 |
| hsa-miR-505    | PRKAG2    | -0.91714252  |
| hsa-miR-770-5p | PRKAG2    | -0.960474144 |
| hsa-miR-149    | LGALS9    | -0.954483929 |
| hsa-miR-193b   | LGALS9    | -0.962243837 |
| hsa-miR-210    | LGALS9    | -0.949437678 |
| hsa-miR-505    | LGALS9    | -0.938357895 |
| hsa-miR-770-5p | LGALS9    | -0.962033551 |
| hsa-miR-149    | NOX1      | -0.913488047 |
| hsa-miR-193b   | NOX1      | -0.916972207 |
| hsa-miR-210    | NOX1      | -0.913744517 |
| hsa-miR-505    | NOX1      | -0.915061981 |
| hsa-miR-770-5p | NOX1      | -0.951175921 |
| hsa-miR-149    | EXOC6B    | -0.927569245 |
| hsa-miR-193b   | EXOC6B    | -0.922523039 |
| hsa-miR-210    | EXOC6B    | -0.938222086 |
| hsa-miR-505    | EXOC6B    | -0.943324187 |
| hsa-miR-770-5p | EXOC6B    | -0.97091304  |
| hsa-miR-149    | MTNR1A    | -0.948626183 |
| hsa-miR-193b   | MTNR1A    | -0.954076004 |

|                |          |              |
|----------------|----------|--------------|
| hsa-miR-210    | MTNR1A   | -0.944137747 |
| hsa-miR-505    | MTNR1A   | -0.924865722 |
| hsa-miR-770-5p | MTNR1A   | -0.983184397 |
| hsa-miR-770-5p | ARMCX6   | -0.905472926 |
| hsa-miR-149    | DSCC1    | -0.94527638  |
| hsa-miR-193b   | DSCC1    | -0.916307046 |
| hsa-miR-210    | DSCC1    | -0.962201607 |
| hsa-miR-365    | DSCC1    | -0.932415941 |
| hsa-miR-505    | DSCC1    | -0.966693532 |
| hsa-miR-770-5p | DSCC1    | -0.959259337 |
| hsa-miR-149    | MAGI2    | -0.946621533 |
| hsa-miR-193b   | MAGI2    | -0.941927165 |
| hsa-miR-210    | MAGI2    | -0.955185962 |
| hsa-miR-505    | MAGI2    | -0.955290116 |
| hsa-miR-770-5p | MAGI2    | -0.972968871 |
| hsa-miR-149    | TAPBPL   | -0.938393729 |
| hsa-miR-193b   | TAPBPL   | -0.92743382  |
| hsa-miR-210    | TAPBPL   | -0.948612171 |
| hsa-miR-505    | TAPBPL   | -0.951680787 |
| hsa-miR-770-5p | TAPBPL   | -0.97147678  |
| hsa-miR-149    | TCTN3    | -0.920669231 |
| hsa-miR-193b   | TCTN3    | -0.90529803  |
| hsa-miR-210    | TCTN3    | -0.937924818 |
| hsa-miR-505    | TCTN3    | -0.943933549 |
| hsa-miR-770-5p | TCTN3    | -0.977735773 |
| hsa-miR-149    | SLC25A18 | -0.912135284 |
| hsa-miR-210    | SLC25A18 | -0.936470418 |
| hsa-miR-505    | SLC25A18 | -0.933892999 |
| hsa-miR-770-5p | SLC25A18 | -0.957195835 |
| hsa-miR-149    | KLK11    | -0.925300923 |
| hsa-miR-210    | KLK11    | -0.942985452 |
| hsa-miR-505    | KLK11    | -0.931323844 |
| hsa-miR-770-5p | KLK11    | -0.971217525 |
| hsa-miR-149    | TMEM87A  | -0.904007492 |
| hsa-miR-193b   | TMEM87A  | -0.919126907 |
| hsa-miR-210    | TMEM87A  | -0.908741246 |
| hsa-miR-505    | TMEM87A  | -0.919394178 |
| hsa-miR-770-5p | TMEM87A  | -0.901826601 |
| hsa-miR-149    | AQP5     | -0.914041627 |
| hsa-miR-193b   | AQP5     | -0.920527017 |
| hsa-miR-210    | AQP5     | -0.920655681 |
| hsa-miR-505    | AQP5     | -0.93299695  |
| hsa-miR-770-5p | AQP5     | -0.924012945 |
| hsa-miR-149    | WDR78    | -0.945463171 |



|                |              |              |
|----------------|--------------|--------------|
| hsa-miR-193b   | WDR78        | -0.936572556 |
| hsa-miR-210    | WDR78        | -0.958964151 |
| hsa-miR-505    | WDR78        | -0.971399947 |
| hsa-miR-770-5p | WDR78        | -0.929743832 |
| hsa-miR-505    | LOC100127980 | -0.901020853 |
| hsa-miR-770-5p | LOC100127980 | -0.952527993 |
| hsa-miR-149    | OASL         | -0.904605886 |
| hsa-miR-193b   | OASL         | -0.904815237 |
| hsa-miR-210    | OASL         | -0.907646363 |
| hsa-miR-505    | OASL         | -0.92256793  |
| hsa-miR-770-5p | OASL         | -0.901269719 |
| hsa-miR-149    | USP48        | -0.942959346 |
| hsa-miR-193b   | USP48        | -0.930326576 |
| hsa-miR-210    | USP48        | -0.954299213 |
| hsa-miR-505    | USP48        | -0.954563102 |
| hsa-miR-770-5p | USP48        | -0.977993224 |
| hsa-miR-149    | TGM2         | -0.938573843 |
| hsa-miR-193b   | TGM2         | -0.928150021 |
| hsa-miR-210    | TGM2         | -0.948845736 |
| hsa-miR-505    | TGM2         | -0.943348395 |
| hsa-miR-770-5p | TGM2         | -0.988125679 |
| hsa-miR-149    | CD99P1       | -0.921942739 |
| hsa-miR-193b   | CD99P1       | -0.930754575 |
| hsa-miR-210    | CD99P1       | -0.922499244 |
| hsa-miR-505    | CD99P1       | -0.914607584 |
| hsa-miR-770-5p | CD99P1       | -0.981278295 |
| hsa-miR-149    | RBM33        | -0.928584013 |
| hsa-miR-210    | RBM33        | -0.945525706 |
| hsa-miR-365    | RBM33        | -0.919782629 |
| hsa-miR-505    | RBM33        | -0.945216243 |
| hsa-miR-770-5p | RBM33        | -0.966137165 |
| hsa-miR-149    | LOC100289098 | -0.914107344 |
| hsa-miR-193b   | LOC100289098 | -0.912375977 |
| hsa-miR-210    | LOC100289098 | -0.918636818 |
| hsa-miR-505    | LOC100289098 | -0.930158907 |
| hsa-miR-770-5p | LOC100289098 | -0.926237768 |
| hsa-miR-149    | SRPK3        | -0.9240874   |
| hsa-miR-193b   | SRPK3        | -0.927512355 |
| hsa-miR-210    | SRPK3        | -0.928479939 |
| hsa-miR-505    | SRPK3        | -0.920764552 |
| hsa-miR-770-5p | SRPK3        | -0.98924274  |
| hsa-miR-149    | SH3PXD2A     | -0.911861975 |
| hsa-miR-193b   | SH3PXD2A     | -0.911995817 |
| hsa-miR-210    | SH3PXD2A     | -0.928184453 |

|                |          |              |
|----------------|----------|--------------|
| hsa-miR-505    | SH3PXD2A | -0.934932459 |
| hsa-miR-770-5p | SH3PXD2A | -0.938840486 |
| hsa-miR-149    | HMGCS1   | -0.961265124 |
| hsa-miR-193b   | HMGCS1   | -0.959020598 |
| hsa-miR-210    | HMGCS1   | -0.963872694 |
| hsa-miR-505    | HMGCS1   | -0.965969572 |
| hsa-miR-770-5p | HMGCS1   | -0.938302013 |
| hsa-miR-149    | C8orf84  | -0.946466221 |
| hsa-miR-193b   | C8orf84  | -0.911216051 |
| hsa-miR-210    | C8orf84  | -0.960462741 |
| hsa-miR-365    | C8orf84  | -0.938451058 |
| hsa-miR-505    | C8orf84  | -0.956871841 |
| hsa-miR-770-5p | C8orf84  | -0.94686757  |
| hsa-miR-149    | ABHD2    | -0.904329833 |
| hsa-miR-193b   | ABHD2    | -0.913601014 |
| hsa-miR-210    | ABHD2    | -0.915678315 |
| hsa-miR-505    | ABHD2    | -0.922246605 |
| hsa-miR-770-5p | ABHD2    | -0.936285134 |
| hsa-miR-770-5p | TCEAL3   | -0.944788261 |
| hsa-miR-149    | C17orf51 | -0.957788487 |
| hsa-miR-193b   | C17orf51 | -0.951185841 |
| hsa-miR-210    | C17orf51 | -0.958177567 |
| hsa-miR-505    | C17orf51 | -0.946419888 |
| hsa-miR-770-5p | C17orf51 | -0.973269734 |
| hsa-miR-210    | DNAJA1   | -0.925361677 |
| hsa-miR-505    | DNAJA1   | -0.94847331  |
| hsa-miR-770-5p | DNAJA1   | -0.91846885  |
| hsa-miR-149    | SPAG1    | -0.919934871 |
| hsa-miR-193b   | SPAG1    | -0.919815787 |
| hsa-miR-210    | SPAG1    | -0.925564757 |
| hsa-miR-505    | SPAG1    | -0.923322711 |
| hsa-miR-770-5p | SPAG1    | -0.981010008 |
| hsa-miR-770-5p | TIMP2    | -0.907267813 |
| hsa-miR-149    | ATP8B4   | -0.937382778 |
| hsa-miR-193b   | ATP8B4   | -0.946295054 |
| hsa-miR-210    | ATP8B4   | -0.939165211 |
| hsa-miR-505    | ATP8B4   | -0.927260303 |
| hsa-miR-770-5p | ATP8B4   | -0.984249554 |
| hsa-miR-149    | GOLGA7   | -0.927350669 |
| hsa-miR-193b   | GOLGA7   | -0.917266867 |
| hsa-miR-210    | GOLGA7   | -0.931777771 |
| hsa-miR-505    | GOLGA7   | -0.920553199 |
| hsa-miR-770-5p | GOLGA7   | -0.984066991 |
| hsa-miR-149    | DOK5     | -0.91558865  |

|                |           |              |
|----------------|-----------|--------------|
| hsa-miR-193b   | DOK5      | -0.902614673 |
| hsa-miR-210    | DOK5      | -0.937476995 |
| hsa-miR-505    | DOK5      | -0.956111211 |
| hsa-miR-770-5p | DOK5      | -0.928821901 |
| hsa-miR-149    | COL18A1   | -0.927731246 |
| hsa-miR-193b   | COL18A1   | -0.905311    |
| hsa-miR-210    | COL18A1   | -0.935033578 |
| hsa-miR-505    | COL18A1   | -0.921546946 |
| hsa-miR-770-5p | COL18A1   | -0.970965089 |
| hsa-miR-149    | STX3      | -0.941066964 |
| hsa-miR-193b   | STX3      | -0.94072454  |
| hsa-miR-210    | STX3      | -0.932048009 |
| hsa-miR-505    | STX3      | -0.923015764 |
| hsa-miR-770-5p | STX3      | -0.921864028 |
| hsa-miR-149    | POM121L9P | -0.9612739   |
| hsa-miR-193b   | POM121L9P | -0.951424914 |
| hsa-miR-210    | POM121L9P | -0.960963656 |
| hsa-miR-365    | POM121L9P | -0.900681626 |
| hsa-miR-505    | POM121L9P | -0.951178208 |
| hsa-miR-770-5p | POM121L9P | -0.959036461 |
| hsa-miR-149    | SH3BGRL2  | -0.938126205 |
| hsa-miR-193b   | SH3BGRL2  | -0.943217786 |
| hsa-miR-210    | SH3BGRL2  | -0.942156971 |
| hsa-miR-505    | SH3BGRL2  | -0.937016031 |
| hsa-miR-770-5p | SH3BGRL2  | -0.97781005  |

hsa, Homo sapiens; miR, microRNA.

Table SIII. Co-expression network.

| Gene name | Indegree | Outdegree | EdgeCount |
|-----------|----------|-----------|-----------|
| SH3BGRL2  | 4        | 0         | 4         |
| POM121L9P | 5        | 0         | 5         |
| STX3      | 5        | 0         | 5         |
| COL18A1   | 5        | 0         | 5         |
| DOK5      | 5        | 0         | 5         |
| GOLGA7    | 5        | 0         | 5         |
| ATP8B4    | 4        | 0         | 4         |
| TIMP2     | 3        | 0         | 3         |
| SPAG1     | 2        | 0         | 2         |
| DNAJA1    | 3        | 0         | 3         |
| CTDSPL2   | 2        | 0         | 2         |
| TMPRSS22  | 5        | 0         | 5         |
| C17orf51  | 5        | 0         | 5         |
| CDC37L1   | 2        | 0         | 2         |

|              |   |   |   |
|--------------|---|---|---|
| NKX2-11      | 5 | 0 | 5 |
| TCEAL3       | 1 | 0 | 1 |
| ABHD2        | 5 | 0 | 5 |
| C8orf84      | 6 | 0 | 6 |
| HMGCS1       | 5 | 0 | 5 |
| SH3PXD2A     | 5 | 0 | 5 |
| FCRLA        | 4 | 0 | 4 |
| SRPK3        | 2 | 0 | 2 |
| LOC100289098 | 6 | 0 | 6 |
| RBM33        | 3 | 0 | 3 |
| CD99P1       | 2 | 0 | 2 |
| TGM2         | 5 | 0 | 5 |
| USP48        | 5 | 0 | 5 |
| OASL         | 6 | 0 | 6 |
| LOC100127980 | 1 | 0 | 1 |
| WDR78        | 6 | 0 | 6 |
| AQP5         | 5 | 0 | 5 |
| TMEM87A      | 5 | 0 | 5 |
| KLK11        | 5 | 0 | 5 |
| SLC25A18     | 5 | 0 | 5 |
| LARP61       | 5 | 0 | 5 |
| TCTN3        | 3 | 0 | 3 |
| TAPBPL       | 5 | 0 | 5 |
| MAGI2        | 5 | 0 | 5 |
| DSCC1        | 6 | 0 | 6 |
| ARMCX6       | 5 | 0 | 5 |
| MTNR1A       | 5 | 0 | 5 |
| EXOC6B       | 5 | 0 | 5 |
| NOX1         | 5 | 0 | 5 |
| LGALS9       | 5 | 0 | 5 |
| PRKAG2       | 5 | 0 | 5 |
| KIAA0020     | 5 | 0 | 5 |
| NTF4         | 5 | 0 | 5 |
| GBP12        | 3 | 0 | 3 |
| HIST1H2BK    | 5 | 0 | 5 |
| COPS8        | 6 | 0 | 6 |
| HOXD10       | 6 | 0 | 6 |
| LOC100499466 | 5 | 0 | 5 |
| HEBP2        | 5 | 0 | 5 |
| DHRS12       | 6 | 0 | 6 |
| LARP4B       | 5 | 0 | 5 |
| SYTL5        | 6 | 0 | 6 |
| CNNM2        | 5 | 0 | 5 |
| GPC1         | 2 | 0 | 2 |

|              |   |   |   |
|--------------|---|---|---|
| IFI44L       | 2 | 0 | 2 |
| CYB5D2       | 2 | 0 | 2 |
| NBN          | 2 | 0 | 2 |
| ZNF548       | 1 | 0 | 1 |
| ZNF185       | 6 | 0 | 6 |
| IFNGR11      | 5 | 0 | 5 |
| PLEKHA21     | 1 | 0 | 1 |
| HGSNAT       | 6 | 0 | 6 |
| FAM81B       | 5 | 0 | 5 |
| CSPP1        | 4 | 0 | 4 |
| LOC100506517 | 1 | 0 | 1 |
| FLJ21408     | 5 | 0 | 5 |
| RAD54B       | 4 | 0 | 4 |
| FLJ32955     | 5 | 0 | 5 |
| CPM          | 6 | 0 | 6 |
| LOC100288911 | 1 | 0 | 1 |
| HOPX         | 5 | 0 | 5 |
| RETSAT       | 1 | 0 | 1 |
| EREG         | 5 | 0 | 5 |
| EHHADH       | 2 | 0 | 2 |
| MAP7         | 6 | 0 | 6 |
| TUBB4Q       | 5 | 0 | 5 |
| FAM105A      | 2 | 0 | 2 |
| C5orf13      | 6 | 0 | 6 |
| PLAC4        | 5 | 0 | 5 |
| USP4         | 5 | 0 | 5 |
| ADSSL1       | 2 | 0 | 2 |
| PIK3AP11     | 5 | 0 | 5 |
| ZDHHC1       | 5 | 0 | 5 |
| SLCO3A1      | 6 | 0 | 6 |
| ZNF91        | 5 | 0 | 5 |
| PARP61       | 5 | 0 | 5 |
| SMARCA11     | 4 | 0 | 4 |
| TCEAL1       | 5 | 0 | 5 |
| SAMHD14      | 5 | 0 | 5 |
| ZNF747       | 4 | 0 | 4 |
| ITPRIPL22    | 5 | 0 | 5 |
| GBP3         | 5 | 0 | 5 |
| PM20D2       | 2 | 0 | 2 |
| C8orf331     | 6 | 0 | 6 |
| MX1          | 5 | 0 | 5 |
| RBMX2        | 5 | 0 | 5 |
| SERPINB1     | 6 | 0 | 6 |
| LOC728192    | 5 | 0 | 5 |

|              |   |   |   |
|--------------|---|---|---|
| PVR1         | 5 | 0 | 5 |
| GPX8         | 4 | 0 | 4 |
| PMAIP1       | 3 | 0 | 3 |
| ALDH6A1      | 4 | 0 | 4 |
| C6orf150     | 5 | 0 | 5 |
| ANKRD27      | 5 | 0 | 5 |
| PDK3         | 3 | 0 | 3 |
| MTO12        | 4 | 0 | 4 |
| C1orf59      | 4 | 0 | 4 |
| TRIP6        | 5 | 0 | 5 |
| FRY          | 5 | 0 | 5 |
| CABLES1      | 2 | 0 | 2 |
| PDZK1IP1     | 5 | 0 | 5 |
| LOC100129034 | 5 | 0 | 5 |
| FAM125A      | 5 | 0 | 5 |
| ASAH12       | 5 | 0 | 5 |
| SULF2        | 5 | 0 | 5 |
| GMDS         | 1 | 0 | 1 |
| SORD1        | 3 | 0 | 3 |
| HSPA12A      | 5 | 0 | 5 |
| PSME2        | 5 | 0 | 5 |
| WFDC2        | 5 | 0 | 5 |
| XAF1         | 5 | 0 | 5 |
| C8orf33      | 1 | 0 | 1 |
| TCEA3        | 3 | 0 | 3 |
| CAV11        | 5 | 0 | 5 |
| FAM174B      | 5 | 0 | 5 |
| CAPNS1       | 5 | 0 | 5 |
| FANCI        | 3 | 0 | 3 |
| TACC11       | 5 | 0 | 5 |
| CD44         | 5 | 0 | 5 |
| NUDT61       | 5 | 0 | 5 |
| NETO21       | 5 | 0 | 5 |
| MBNL3        | 3 | 0 | 3 |
| PLEKHM3      | 5 | 0 | 5 |
| PI3          | 5 | 0 | 5 |
| PLIN2        | 5 | 0 | 5 |
| FAR2         | 2 | 0 | 2 |
| HR1          | 5 | 0 | 5 |
| SNX10        | 6 | 0 | 6 |
| MOSC21       | 4 | 0 | 4 |
| FZD2         | 5 | 0 | 5 |
| TNNT1        | 4 | 0 | 4 |
| ADRB1        | 5 | 0 | 5 |

|              |   |   |   |
|--------------|---|---|---|
| CREBBP       | 2 | 0 | 2 |
| CXCL11       | 5 | 0 | 5 |
| TRMT11       | 5 | 0 | 5 |
| ZNF585A1     | 5 | 0 | 5 |
| IGSF10       | 2 | 0 | 2 |
| WWC3         | 2 | 0 | 2 |
| PPAPDC1B     | 4 | 0 | 4 |
| CYP2B6       | 5 | 0 | 5 |
| SLC22A25     | 6 | 0 | 6 |
| ZNF585A      | 5 | 0 | 5 |
| PELI1        | 5 | 0 | 5 |
| PVR          | 4 | 0 | 4 |
| ACADSB       | 5 | 0 | 5 |
| NCBP1        | 1 | 0 | 1 |
| SCPEP1       | 5 | 0 | 5 |
| LAMC2        | 6 | 0 | 6 |
| ARHGAP18     | 6 | 0 | 6 |
| GLIPR11      | 5 | 0 | 5 |
| BRCC33       | 4 | 0 | 4 |
| XPNPEP3      | 5 | 0 | 5 |
| VGLL3        | 6 | 0 | 6 |
| SLC33A1      | 5 | 0 | 5 |
| ANKS4B       | 3 | 0 | 3 |
| PRSS2        | 2 | 0 | 2 |
| ACOT8        | 2 | 0 | 2 |
| RNASET21     | 5 | 0 | 5 |
| ZNF6141      | 6 | 0 | 6 |
| SERPINB9     | 5 | 0 | 5 |
| CREG2        | 5 | 0 | 5 |
| C2orf55      | 2 | 0 | 2 |
| ATP7B        | 5 | 0 | 5 |
| INPP5D1      | 5 | 0 | 5 |
| PCGF51       | 5 | 0 | 5 |
| VNN11        | 4 | 0 | 4 |
| LOC100507463 | 5 | 0 | 5 |
| ITPRIPL21    | 5 | 0 | 5 |
| FAM3D        | 5 | 0 | 5 |
| ATF7IP       | 6 | 0 | 6 |
| PARP6        | 5 | 0 | 5 |
| ARL3         | 5 | 0 | 5 |
| PSMB9        | 3 | 0 | 3 |
| TMC7         | 5 | 0 | 5 |
| RBPM5        | 5 | 0 | 5 |
| GTPBP10      | 5 | 0 | 5 |

|              |   |   |   |
|--------------|---|---|---|
| NOXO1        | 5 | 0 | 5 |
| SERPINA11    | 6 | 0 | 6 |
| C12orf24     | 1 | 0 | 1 |
| PIGR         | 6 | 0 | 6 |
| MRPS21       | 6 | 0 | 6 |
| BMP2         | 5 | 0 | 5 |
| CISH         | 5 | 0 | 5 |
| PTPRN2       | 5 | 0 | 5 |
| BAG1         | 4 | 0 | 4 |
| TAF12        | 3 | 0 | 3 |
| FXVD51       | 5 | 0 | 5 |
| NSMAF        | 5 | 0 | 5 |
| SYBU         | 5 | 0 | 5 |
| WVOX         | 5 | 0 | 5 |
| DTX3L        | 5 | 0 | 5 |
| ITGAD        | 5 | 0 | 5 |
| SNX21        | 5 | 0 | 5 |
| PLEKHA2      | 5 | 0 | 5 |
| ZNF334       | 5 | 0 | 5 |
| SLC22A3      | 5 | 0 | 5 |
| NAV11        | 5 | 0 | 5 |
| ACPL2        | 4 | 0 | 4 |
| SDHD         | 5 | 0 | 5 |
| LOC100132735 | 5 | 0 | 5 |
| SLC7A61      | 4 | 0 | 4 |
| C2orf81      | 2 | 0 | 2 |
| MUC1         | 4 | 0 | 4 |
| PKDCC        | 2 | 0 | 2 |
| ZNF642       | 6 | 0 | 6 |
| NSUN6        | 4 | 0 | 4 |
| HAPLN13      | 6 | 0 | 6 |
| ARSD         | 4 | 0 | 4 |
| SYTL4        | 5 | 0 | 5 |
| SLC1A11      | 3 | 0 | 3 |
| ABCC4        | 5 | 0 | 5 |
| SEMA4D       | 5 | 0 | 5 |
| LOC100507448 | 4 | 0 | 4 |
| HPRT1        | 5 | 0 | 5 |
| CPVL         | 5 | 0 | 5 |
| TRIM71       | 5 | 0 | 5 |
| HR           | 4 | 0 | 4 |
| DKC12        | 5 | 0 | 5 |
| SDR16C5      | 5 | 0 | 5 |
| TAZ          | 5 | 0 | 5 |



|          |   |   |   |
|----------|---|---|---|
| SOSTDC1  | 4 | 0 | 4 |
| YRDC     | 5 | 0 | 5 |
| FSCN11   | 5 | 0 | 5 |
| SLFN5    | 6 | 0 | 6 |
| C9orf9   | 5 | 0 | 5 |
| ASAH11   | 1 | 0 | 1 |
| QRICH2   | 5 | 0 | 5 |
| MTO11    | 4 | 0 | 4 |
| CPNE8    | 5 | 0 | 5 |
| MTM1     | 5 | 0 | 5 |
| IFIH1    | 5 | 0 | 5 |
| SEMA3A   | 2 | 0 | 2 |
| AIFM1    | 5 | 0 | 5 |
| IDS3     | 2 | 0 | 2 |
| CALD12   | 1 | 0 | 1 |
| PHKB     | 5 | 0 | 5 |
| RAB3A    | 5 | 0 | 5 |
| PRKCA1   | 2 | 0 | 2 |
| TRIM7    | 5 | 0 | 5 |
| SLC26A21 | 1 | 0 | 1 |
| IDS2     | 4 | 0 | 4 |
| MAP3K1   | 5 | 0 | 5 |
| AKR1E2   | 6 | 0 | 6 |
| KLHL52   | 5 | 0 | 5 |
| CCDC14   | 5 | 0 | 5 |
| GLRX     | 2 | 0 | 2 |
| MCM41    | 1 | 0 | 1 |
| C19orf54 | 3 | 0 | 3 |
| IL5RA    | 1 | 0 | 1 |
| OAS2     | 4 | 0 | 4 |
| LMO4     | 2 | 0 | 2 |
| NUDT6    | 5 | 0 | 5 |
| RNMT     | 2 | 0 | 2 |
| PEX31    | 5 | 0 | 5 |
| CLDN1    | 2 | 0 | 2 |
| TFPI1    | 6 | 0 | 6 |
| MCAM1    | 5 | 0 | 5 |
| NPY6R    | 1 | 0 | 1 |
| PAM1     | 5 | 0 | 5 |
| AK4      | 4 | 0 | 4 |
| LIPH     | 2 | 0 | 2 |
| CACNG41  | 5 | 0 | 5 |
| EIF4E3   | 2 | 0 | 2 |
| SLC26A2  | 6 | 0 | 6 |

|              |   |   |   |
|--------------|---|---|---|
| RAPGEF2      | 5 | 0 | 5 |
| MECP2        | 5 | 0 | 5 |
| ATP6V1C1     | 5 | 0 | 5 |
| SNAPC3       | 5 | 0 | 5 |
| RNASET2      | 1 | 0 | 1 |
| SPIRE1       | 3 | 0 | 3 |
| PRRT2        | 6 | 0 | 6 |
| NRXN1        | 5 | 0 | 5 |
| OGFRL1       | 1 | 0 | 1 |
| SCFD1        | 6 | 0 | 6 |
| DAB21        | 4 | 0 | 4 |
| LYSMD2       | 3 | 0 | 3 |
| FLJ20464     | 1 | 0 | 1 |
| DHFRL1       | 2 | 0 | 2 |
| TNKS         | 1 | 0 | 1 |
| PML1         | 5 | 0 | 5 |
| ERICH1       | 6 | 0 | 6 |
| NOTCH3       | 6 | 0 | 6 |
| C1orf163     | 5 | 0 | 5 |
| TACC1        | 5 | 0 | 5 |
| LOC146336    | 5 | 0 | 5 |
| DENND5B      | 6 | 0 | 6 |
| HLA-F1       | 5 | 0 | 5 |
| SIGMAR1      | 2 | 0 | 2 |
| ARRB1        | 5 | 0 | 5 |
| LOC339260    | 1 | 0 | 1 |
| KANK1        | 6 | 0 | 6 |
| ATE1         | 2 | 0 | 2 |
| PARP9        | 5 | 0 | 5 |
| RFK1         | 2 | 0 | 2 |
| IFIT21       | 5 | 0 | 5 |
| SLC25A42     | 3 | 0 | 3 |
| TRIM22       | 2 | 0 | 2 |
| C1orf58      | 5 | 0 | 5 |
| NDUFA4L2     | 1 | 0 | 1 |
| MLLT11       | 5 | 0 | 5 |
| BNIP3L1      | 5 | 0 | 5 |
| INPP5D       | 1 | 0 | 1 |
| FAM55C1      | 6 | 0 | 6 |
| LOC100129029 | 5 | 0 | 5 |
| KLHL51       | 5 | 0 | 5 |
| LAPTM4B1     | 1 | 0 | 1 |
| C2orf68      | 5 | 0 | 5 |
| ARRDC4       | 3 | 0 | 3 |

|              |   |   |   |
|--------------|---|---|---|
| GIN51        | 4 | 0 | 4 |
| RFK          | 5 | 0 | 5 |
| RDH5         | 1 | 0 | 1 |
| ACTR3C       | 5 | 0 | 5 |
| CNN3         | 6 | 0 | 6 |
| LOC100288954 | 4 | 0 | 4 |
| CCDC123      | 5 | 0 | 5 |
| FLJ39632     | 6 | 0 | 6 |
| GYG21        | 3 | 0 | 3 |
| ITPRIPL2     | 6 | 0 | 6 |
| ZNF6552      | 5 | 0 | 5 |
| CYP3A5       | 1 | 0 | 1 |
| LYST         | 5 | 0 | 5 |
| C9orf64      | 1 | 0 | 1 |
| C8orf40      | 3 | 0 | 3 |
| B4GALT5      | 1 | 0 | 1 |
| SNX24        | 6 | 0 | 6 |
| LY75         | 5 | 0 | 5 |
| ZNF467       | 2 | 0 | 2 |
| SLC37A1      | 5 | 0 | 5 |
| KIAA0182     | 5 | 0 | 5 |
| RBM9         | 3 | 0 | 3 |
| CD552        | 3 | 0 | 3 |
| DRAM1        | 6 | 0 | 6 |
| PHLPP2       | 2 | 0 | 2 |
| ZNF831       | 5 | 0 | 5 |
| DDX60L       | 5 | 0 | 5 |
| LOC388946    | 5 | 0 | 5 |
| MTCP1NB      | 2 | 0 | 2 |
| HEATR7A      | 2 | 0 | 2 |
| NMB          | 5 | 0 | 5 |
| SORD         | 2 | 0 | 2 |
| PAM          | 5 | 0 | 5 |
| MDK          | 5 | 0 | 5 |
| ZNF5991      | 3 | 0 | 3 |
| EDIL31       | 5 | 0 | 5 |
| MTUS12       | 2 | 0 | 2 |
| DTNA         | 5 | 0 | 5 |
| ZNF514       | 5 | 0 | 5 |
| PSD31        | 5 | 0 | 5 |
| HIST1H2BD    | 6 | 0 | 6 |
| HPDL         | 5 | 0 | 5 |
| IFIT1        | 3 | 0 | 3 |
| IDS1         | 4 | 0 | 4 |

|          |   |   |   |
|----------|---|---|---|
| LOC92249 | 5 | 0 | 5 |
| CARD9    | 5 | 0 | 5 |
| GCNT1    | 5 | 0 | 5 |
| RPS21    | 5 | 0 | 5 |
| VBP1     | 1 | 0 | 1 |
| NAB2     | 4 | 0 | 4 |
| PLD13    | 5 | 0 | 5 |
| PPP2R3A1 | 6 | 0 | 6 |
| FAIM     | 5 | 0 | 5 |
| VMA211   | 5 | 0 | 5 |
| SERPINA1 | 5 | 0 | 5 |
| RGS16    | 6 | 0 | 6 |
| AZGP1    | 4 | 0 | 4 |
| VIPR1    | 2 | 0 | 2 |
| PEX3     | 5 | 0 | 5 |
| CCNE21   | 5 | 0 | 5 |
| PLOD21   | 3 | 0 | 3 |
| GATA3    | 3 | 0 | 3 |
| BIRC3    | 5 | 0 | 5 |
| PDGFC    | 2 | 0 | 2 |
| FAM3A    | 5 | 0 | 5 |
| ASAH1    | 5 | 0 | 5 |
| 01-Sep   | 5 | 0 | 5 |
| PDZK1    | 5 | 0 | 5 |
| SH3D20   | 5 | 0 | 5 |
| DOCK1    | 5 | 0 | 5 |
| LRRN4    | 5 | 0 | 5 |
| SLC19A13 | 5 | 0 | 5 |
| TRAPPC6A | 2 | 0 | 2 |
| ASAP13   | 2 | 0 | 2 |
| MOSPD1   | 5 | 0 | 5 |
| SLC4A11  | 5 | 0 | 5 |
| NSDHL    | 5 | 0 | 5 |
| DTNB     | 3 | 0 | 3 |
| HERC6    | 5 | 0 | 5 |
| CCL20    | 5 | 0 | 5 |
| KCNE32   | 5 | 0 | 5 |
| FAM26E   | 1 | 0 | 1 |
| UGGT2    | 2 | 0 | 2 |
| RSAD21   | 5 | 0 | 5 |
| ALPK3    | 2 | 0 | 2 |
| LRP12    | 5 | 0 | 5 |
| SLC39A8  | 5 | 0 | 5 |
| ABCC11   | 5 | 0 | 5 |

|           |   |   |   |
|-----------|---|---|---|
| CSF2RA    | 5 | 0 | 5 |
| IMPA1     | 5 | 0 | 5 |
| CTSB2     | 5 | 0 | 5 |
| RASGRF2   | 5 | 0 | 5 |
| TMPRSS21  | 5 | 0 | 5 |
| FBXL16    | 5 | 0 | 5 |
| KLHL5     | 5 | 0 | 5 |
| CD551     | 5 | 0 | 5 |
| ASAP12    | 5 | 0 | 5 |
| ZNF614    | 5 | 0 | 5 |
| IFI6      | 5 | 0 | 5 |
| C11orf75  | 6 | 0 | 6 |
| TXNIP2    | 2 | 0 | 2 |
| PLSCR11   | 6 | 0 | 6 |
| SKAP1     | 5 | 0 | 5 |
| MTMR12    | 3 | 0 | 3 |
| FAM60A    | 5 | 0 | 5 |
| KCNE31    | 2 | 0 | 2 |
| LOC283867 | 5 | 0 | 5 |
| TMEM66    | 5 | 0 | 5 |
| FSCN1     | 5 | 0 | 5 |
| LPIN2     | 6 | 0 | 6 |
| ASCL2     | 1 | 0 | 1 |
| LAPTM4B   | 6 | 0 | 6 |
| IFNGR1    | 5 | 0 | 5 |
| CCNE2     | 5 | 0 | 5 |
| C10orf122 | 3 | 0 | 3 |
| CLGN      | 5 | 0 | 5 |
| LANCL2    | 5 | 0 | 5 |
| MCAM      | 5 | 0 | 5 |
| NUDT12    | 5 | 0 | 5 |
| MTO1      | 5 | 0 | 5 |
| MYST3     | 5 | 0 | 5 |
| CD244     | 5 | 0 | 5 |
| NEBL1     | 5 | 0 | 5 |
| IRAK11    | 2 | 0 | 2 |
| CD55      | 5 | 0 | 5 |
| DKC11     | 2 | 0 | 2 |
| FLJ22184  | 5 | 0 | 5 |
| DKC1      | 2 | 0 | 2 |
| OSBPL1A   | 5 | 0 | 5 |
| EEF1A2    | 5 | 0 | 5 |
| AIF1L     | 1 | 0 | 1 |
| SFXN31    | 5 | 0 | 5 |

|                |   |     |     |
|----------------|---|-----|-----|
| C3orf57        | 4 | 0   | 4   |
| FANK1          | 2 | 0   | 2   |
| FAM69A1        | 4 | 0   | 4   |
| MIA3           | 5 | 0   | 5   |
| SLC2A13        | 5 | 0   | 5   |
| ATF6           | 3 | 0   | 3   |
| PDLIM2         | 5 | 0   | 5   |
| EFS            | 3 | 0   | 3   |
| BTBD16         | 5 | 0   | 5   |
| HOOK3          | 5 | 0   | 5   |
| FAM198B        | 2 | 0   | 2   |
| CDH11          | 2 | 0   | 2   |
| hsa-miR-125b-2 | 0 | 29  | 29  |
| hsa-miR-770-5p | 0 | 453 | 453 |
| hsa-miR-505    | 0 | 382 | 382 |
| hsa-miR-365    | 0 | 93  | 93  |
| hsa-miR-210    | 0 | 373 | 373 |
| hsa-miR-193b   | 0 | 315 | 315 |
| PLOD2          | 6 | 0   | 6   |
| hsa-miR-149    | 0 | 336 | 336 |
| GALNT10        | 3 | 0   | 3   |
| TFPI           | 5 | 0   | 5   |
| CAP2           | 2 | 0   | 2   |
| PLSCR1         | 3 | 0   | 3   |
| CYP1B12        | 3 | 0   | 3   |
| TRIM16L        | 6 | 0   | 6   |
| KCNN4          | 5 | 0   | 5   |
| TMX4           | 4 | 0   | 4   |
| CDHR1          | 5 | 0   | 5   |
| XK             | 6 | 0   | 6   |
| EDN1           | 3 | 0   | 3   |
| TWSG1          | 2 | 0   | 2   |
| SCLY           | 2 | 0   | 2   |
| LOC100507192   | 6 | 0   | 6   |
| SYTL1          | 4 | 0   | 4   |
| EFR3B          | 3 | 0   | 3   |
| GATM           | 2 | 0   | 2   |
| AUTS2          | 3 | 0   | 3   |
| C1orf97        | 3 | 0   | 3   |
| LOC387895      | 5 | 0   | 5   |
| SEPP1          | 4 | 0   | 4   |
| AGMAT          | 4 | 0   | 4   |
| NXF3           | 3 | 0   | 3   |
| MSRA           | 5 | 0   | 5   |

|           |   |   |   |
|-----------|---|---|---|
| HMGB3     | 3 | 0 | 3 |
| LIPG      | 4 | 0 | 4 |
| BRCC32    | 3 | 0 | 3 |
| EMD       | 3 | 0 | 3 |
| SCIN1     | 2 | 0 | 2 |
| PML       | 4 | 0 | 4 |
| MCTP11    | 5 | 0 | 5 |
| TMED71    | 5 | 0 | 5 |
| DIAPH3    | 6 | 0 | 6 |
| MCM4      | 5 | 0 | 5 |
| WDR55     | 3 | 0 | 3 |
| PTPRK     | 4 | 0 | 4 |
| SLC19A12  | 4 | 0 | 4 |
| C6orf145  | 4 | 0 | 4 |
| CASP1     | 2 | 0 | 2 |
| C17orf97  | 4 | 0 | 4 |
| FAM122B   | 3 | 0 | 3 |
| TMED7     | 3 | 0 | 3 |
| GYG2      | 4 | 0 | 4 |
| ZFYVE162  | 3 | 0 | 3 |
| LOC150005 | 4 | 0 | 4 |
| PARP14    | 5 | 0 | 5 |
| MYCL1     | 4 | 0 | 4 |
| FXYD5     | 2 | 0 | 2 |
| MOSC2     | 2 | 0 | 2 |
| NUDT4P1   | 2 | 0 | 2 |
| MCOLN3    | 5 | 0 | 5 |
| TFF3      | 5 | 0 | 5 |
| CHST4     | 6 | 0 | 6 |
| TXNIP1    | 2 | 0 | 2 |
| EPAS1     | 3 | 0 | 3 |
| OBFC1     | 3 | 0 | 3 |
| KIAA1984  | 2 | 0 | 2 |
| STAU2     | 3 | 0 | 3 |
| MSH32     | 5 | 0 | 5 |
| SOX8      | 4 | 0 | 4 |
| ISG15     | 7 | 0 | 7 |
| C2orf89   | 3 | 0 | 3 |
| BRCC31    | 5 | 0 | 5 |
| SNTB1     | 5 | 0 | 5 |
| CEACAM1   | 5 | 0 | 5 |
| ZNF609    | 4 | 0 | 4 |
| MMP281    | 3 | 0 | 3 |
| FBXL17    | 4 | 0 | 4 |

|              |   |   |   |
|--------------|---|---|---|
| TNFRSF10D    | 3 | 0 | 3 |
| SCML4        | 6 | 0 | 6 |
| ASRGL1       | 2 | 0 | 2 |
| CALD11       | 5 | 0 | 5 |
| CD37         | 3 | 0 | 3 |
| MFAP3L       | 1 | 0 | 1 |
| HLA-F        | 4 | 0 | 4 |
| ERLIN2       | 2 | 0 | 2 |
| TMEM185A     | 5 | 0 | 5 |
| UBL4A        | 4 | 0 | 4 |
| SP140L       | 2 | 0 | 2 |
| CTGF         | 4 | 0 | 4 |
| KRT17        | 3 | 0 | 3 |
| TAP21        | 3 | 0 | 3 |
| KCNMB4       | 6 | 0 | 6 |
| CTSB1        | 3 | 0 | 3 |
| LOC100505609 | 5 | 0 | 5 |
| DNAJC18      | 5 | 0 | 5 |
| ATP6AP1      | 2 | 0 | 2 |
| ITPKA        | 6 | 0 | 6 |
| FAM85A       | 4 | 0 | 4 |
| IRF9         | 5 | 0 | 5 |
| PCGF5        | 3 | 0 | 3 |
| KLF15        | 5 | 0 | 5 |
| ASAP11       | 5 | 0 | 5 |
| REPIN1       | 5 | 0 | 5 |
| ALCAM1       | 3 | 0 | 3 |
| SLC25A45     | 3 | 0 | 3 |
| CALD1        | 4 | 0 | 4 |
| PAG1         | 7 | 0 | 7 |
| TCEAL4       | 5 | 0 | 5 |
| ITGA9        | 2 | 0 | 2 |
| HOXA2        | 2 | 0 | 2 |
| EPSTI1       | 7 | 0 | 7 |
| SLC1A1       | 5 | 0 | 5 |
| LGALS2       | 4 | 0 | 4 |
| DAB2         | 4 | 0 | 4 |
| SFXN3        | 5 | 0 | 5 |
| MTUS11       | 5 | 0 | 5 |
| OAS1         | 2 | 0 | 2 |
| CYP1B11      | 5 | 0 | 5 |
| LOC100287628 | 3 | 0 | 3 |
| SLC7A6       | 3 | 0 | 3 |
| ITGA11       | 7 | 0 | 7 |



|              |   |   |   |
|--------------|---|---|---|
| FDFT11       | 4 | 0 | 4 |
| PSD3         | 4 | 0 | 4 |
| PLCB41       | 4 | 0 | 4 |
| ZDHHC22      | 2 | 0 | 2 |
| RARRES11     | 3 | 0 | 3 |
| ZNF3021      | 3 | 0 | 3 |
| TXNIP        | 5 | 0 | 5 |
| NEK11        | 7 | 0 | 7 |
| IL1F7        | 5 | 0 | 5 |
| ITGA1        | 3 | 0 | 3 |
| FMR11        | 2 | 0 | 2 |
| TM4SF4       | 7 | 0 | 7 |
| ERN2         | 3 | 0 | 3 |
| DPY19L2P2    | 2 | 0 | 2 |
| ZDHHC4       | 5 | 0 | 5 |
| MYB          | 4 | 0 | 4 |
| ATP11C       | 3 | 0 | 3 |
| LGR5         | 7 | 0 | 7 |
| FOXJ1        | 4 | 0 | 4 |
| ALDH3A1      | 3 | 0 | 3 |
| BGN1         | 4 | 0 | 4 |
| ZC3H12C      | 6 | 0 | 6 |
| HOXA11-AS    | 3 | 0 | 3 |
| LOC439911    | 3 | 0 | 3 |
| C7orf29      | 4 | 0 | 4 |
| SMARCA1      | 3 | 0 | 3 |
| CTSB         | 4 | 0 | 4 |
| VAMP7        | 4 | 0 | 4 |
| ENO2         | 5 | 0 | 5 |
| LOC100506844 | 6 | 0 | 6 |
| NEBL         | 5 | 0 | 5 |
| MACROD2      | 5 | 0 | 5 |
| SNAI3        | 4 | 0 | 4 |
| PLD12        | 5 | 0 | 5 |
| HLA-C3       | 5 | 0 | 5 |
| SEPW1        | 7 | 0 | 7 |
| RNF170       | 6 | 0 | 6 |
| NCRNA00103   | 7 | 0 | 7 |
| GPC41        | 5 | 0 | 5 |
| POLL         | 3 | 0 | 3 |
| ALDH1A1      | 5 | 0 | 5 |
| BCL2L15      | 4 | 0 | 4 |
| LARP6        | 5 | 0 | 5 |
| GABRE        | 3 | 0 | 3 |

|           |   |   |   |
|-----------|---|---|---|
| LOC283352 | 5 | 0 | 5 |
| RASSF8    | 5 | 0 | 5 |
| MUC131    | 3 | 0 | 3 |
| NHSL1     | 2 | 0 | 2 |
| SEMA4G    | 3 | 0 | 3 |
| AGT       | 4 | 0 | 4 |
| PLD11     | 2 | 0 | 2 |
| CNTNAP21  | 5 | 0 | 5 |
| DCDC5     | 5 | 0 | 5 |
| RARRES1   | 2 | 0 | 2 |
| PIGZ      | 3 | 0 | 3 |
| CDH1      | 4 | 0 | 4 |
| CASP2     | 4 | 0 | 4 |
| DHRS2     | 3 | 0 | 3 |
| DKK1      | 3 | 0 | 3 |
| PPP2R3A   | 3 | 0 | 3 |
| YBX2      | 4 | 0 | 4 |
| SUCNR1    | 4 | 0 | 4 |
| OSGIN2    | 3 | 0 | 3 |
| CRIP2     | 2 | 0 | 2 |
| MBIP      | 3 | 0 | 3 |
| ISG201    | 2 | 0 | 2 |
| MLF1      | 3 | 0 | 3 |
| ELFN2     | 4 | 0 | 4 |
| KLF121    | 4 | 0 | 4 |
| LAGE3     | 5 | 0 | 5 |
| ACTN4     | 4 | 0 | 4 |
| KCNE3     | 4 | 0 | 4 |
| VCAN2     | 5 | 0 | 5 |
| FDFT1     | 2 | 0 | 2 |
| TMPRSS2   | 4 | 0 | 4 |
| AGPAT5    | 5 | 0 | 5 |
| NETO2     | 4 | 0 | 4 |
| IFIT2     | 6 | 0 | 6 |
| BCAP31    | 4 | 0 | 4 |
| TAP2      | 5 | 0 | 5 |
| ANKRD50   | 3 | 0 | 3 |
| MTUS1     | 5 | 0 | 5 |
| CMBL      | 5 | 0 | 5 |
| PPP1R14C  | 5 | 0 | 5 |
| PARP12    | 5 | 0 | 5 |
| HAUS7     | 6 | 0 | 6 |
| HAPLN12   | 3 | 0 | 3 |
| ASAP1     | 3 | 0 | 3 |

|            |   |   |   |
|------------|---|---|---|
| NDRG1      | 3 | 0 | 3 |
| SAMHD13    | 2 | 0 | 2 |
| LOC3898311 | 5 | 0 | 5 |
| IDH3G1     | 6 | 0 | 6 |
| RSAD2      | 4 | 0 | 4 |
| AMPD3      | 5 | 0 | 5 |
| FXVD31     | 2 | 0 | 2 |
| FMR1       | 5 | 0 | 5 |
| CYP1B1     | 3 | 0 | 3 |
| TUBAL3     | 2 | 0 | 2 |
| MSH31      | 3 | 0 | 3 |
| ARHGAP24   | 7 | 0 | 7 |
| ZNF302     | 5 | 0 | 5 |
| CSRNP3     | 4 | 0 | 4 |
| ZCCHC24    | 5 | 0 | 5 |
| SSR4       | 3 | 0 | 3 |
| SESN1      | 6 | 0 | 6 |
| HPN        | 5 | 0 | 5 |
| ALDH1A3    | 2 | 0 | 2 |
| ATHL1      | 3 | 0 | 3 |
| VCAN1      | 3 | 0 | 3 |
| SSBP23     | 5 | 0 | 5 |
| AKR1C12    | 3 | 0 | 3 |
| C4orf47    | 3 | 0 | 3 |
| C13orf15   | 3 | 0 | 3 |
| DNAJC151   | 3 | 0 | 3 |
| UBE2L6     | 5 | 0 | 5 |
| WDR54      | 2 | 0 | 2 |
| SPATA22    | 4 | 0 | 4 |
| DNAH5      | 3 | 0 | 3 |
| DGAT2      | 2 | 0 | 2 |
| PPP1R1B    | 5 | 0 | 5 |
| IFITM3     | 3 | 0 | 3 |
| TACR3      | 5 | 0 | 5 |
| FAM55C     | 4 | 0 | 4 |
| MSH3       | 7 | 0 | 7 |
| BLMH       | 3 | 0 | 3 |
| CAV1       | 6 | 0 | 6 |
| ENPP5      | 4 | 0 | 4 |
| XRCC43     | 5 | 0 | 5 |
| ZFYVE161   | 4 | 0 | 4 |
| IFIT3      | 5 | 0 | 5 |
| RARRES3    | 3 | 0 | 3 |
| FUNDC2     | 4 | 0 | 4 |

|              |   |   |   |
|--------------|---|---|---|
| HAPLN11      | 3 | 0 | 3 |
| ARHGEF4      | 3 | 0 | 3 |
| SERPINH1     | 7 | 0 | 7 |
| TRIM29       | 5 | 0 | 5 |
| TMEM167A1    | 5 | 0 | 5 |
| HLA-G1       | 4 | 0 | 4 |
| FAM69A       | 4 | 0 | 4 |
| DNAJA42      | 3 | 0 | 3 |
| EDIL3        | 4 | 0 | 4 |
| HYLS1        | 4 | 0 | 4 |
| HIST1H2AC    | 5 | 0 | 5 |
| CLN8         | 4 | 0 | 4 |
| MYLK         | 3 | 0 | 3 |
| IRAK1        | 2 | 0 | 2 |
| GBP11        | 2 | 0 | 2 |
| REPS2        | 3 | 0 | 3 |
| DUSP5        | 3 | 0 | 3 |
| GDI1         | 6 | 0 | 6 |
| PLD1         | 4 | 0 | 4 |
| ATP10B       | 5 | 0 | 5 |
| CD200        | 5 | 0 | 5 |
| TMLHE        | 5 | 0 | 5 |
| FAM50A       | 4 | 0 | 4 |
| IDS          | 4 | 0 | 4 |
| MTMR11       | 4 | 0 | 4 |
| GPC4         | 3 | 0 | 3 |
| CLEC3A       | 4 | 0 | 4 |
| KLF12        | 5 | 0 | 5 |
| GRHL2        | 2 | 0 | 2 |
| RARRES2      | 2 | 0 | 2 |
| PSMB8        | 5 | 0 | 5 |
| SYT13        | 4 | 0 | 4 |
| EPHB2        | 5 | 0 | 5 |
| ERP27        | 3 | 0 | 3 |
| AKR1C11      | 3 | 0 | 3 |
| CXorf40B     | 2 | 0 | 2 |
| ATG102       | 3 | 0 | 3 |
| CTSS         | 6 | 0 | 6 |
| AKR1C21      | 5 | 0 | 5 |
| MTMR1        | 3 | 0 | 3 |
| LOC400573    | 4 | 0 | 4 |
| LOC100129827 | 7 | 0 | 7 |
| LOC389831    | 5 | 0 | 5 |
| PPM1K        | 5 | 0 | 5 |

|               |   |   |   |
|---------------|---|---|---|
| CXorf40A      | 5 | 0 | 5 |
| MCTP1         | 5 | 0 | 5 |
| MUC13         | 4 | 0 | 4 |
| COL1A1        | 4 | 0 | 4 |
| SPATA17       | 3 | 0 | 3 |
| HES6          | 4 | 0 | 4 |
| BRCC3         | 4 | 0 | 4 |
| IDH3G         | 6 | 0 | 6 |
| OAS3          | 5 | 0 | 5 |
| HLA-B2        | 4 | 0 | 4 |
| LOC100505483  | 3 | 0 | 3 |
| NMI           | 3 | 0 | 3 |
| PLCXD1        | 4 | 0 | 4 |
| ZFYVE16       | 7 | 0 | 7 |
| DSE           | 2 | 0 | 2 |
| HBE1          | 2 | 0 | 2 |
| AKR1C2        | 5 | 0 | 5 |
| LOC1001310671 | 6 | 0 | 6 |
| HAPLN1        | 7 | 0 | 7 |
| MYO7A         | 2 | 0 | 2 |
| IFI161        | 3 | 0 | 3 |
| GAMT          | 4 | 0 | 4 |
| TAGLN         | 7 | 0 | 7 |
| HLA-B1        | 3 | 0 | 3 |
| LY6E          | 5 | 0 | 5 |
| S100A4        | 4 | 0 | 4 |
| HLA-G         | 3 | 0 | 3 |
| SLC38A5       | 6 | 0 | 6 |
| SH3RF2        | 2 | 0 | 2 |
| FBXO25        | 2 | 0 | 2 |
| BLVRA2        | 4 | 0 | 4 |
| BNIP3L        | 3 | 0 | 3 |
| RASSF5        | 5 | 0 | 5 |
| PRSS12        | 2 | 0 | 2 |
| MMP28         | 4 | 0 | 4 |
| AKR1C1        | 5 | 0 | 5 |
| CNTNAP2       | 5 | 0 | 5 |
| SLC5A4        | 4 | 0 | 4 |
| KBTD11        | 2 | 0 | 2 |
| VMA21         | 3 | 0 | 3 |
| TAP1          | 2 | 0 | 2 |
| IFI16         | 3 | 0 | 3 |
| DHFR3         | 5 | 0 | 5 |
| ZIC2          | 5 | 0 | 5 |

|              |   |   |   |
|--------------|---|---|---|
| NNMT1        | 3 | 0 | 3 |
| IFITM11      | 4 | 0 | 4 |
| SLC19A11     | 4 | 0 | 4 |
| LOC342918    | 4 | 0 | 4 |
| CADPS2       | 5 | 0 | 5 |
| BLVRA1       | 3 | 0 | 3 |
| DHFR2        | 3 | 0 | 3 |
| PIK3AP1      | 3 | 0 | 3 |
| CD991        | 2 | 0 | 2 |
| MATN2        | 2 | 0 | 2 |
| PHC1         | 4 | 0 | 4 |
| ZNF6551      | 5 | 0 | 5 |
| SSBP22       | 3 | 0 | 3 |
| ZNF655       | 4 | 0 | 4 |
| XRCC42       | 3 | 0 | 3 |
| SLC16A4      | 2 | 0 | 2 |
| XRCC41       | 6 | 0 | 6 |
| SAMHD12      | 5 | 0 | 5 |
| PECI         | 5 | 0 | 5 |
| SSBP21       | 3 | 0 | 3 |
| VCAN         | 3 | 0 | 3 |
| GBP1         | 5 | 0 | 5 |
| COMP         | 4 | 0 | 4 |
| LOC401324    | 5 | 0 | 5 |
| PRKCA        | 3 | 0 | 3 |
| FKRP         | 5 | 0 | 5 |
| PLAC8        | 5 | 0 | 5 |
| HLA-C2       | 4 | 0 | 4 |
| PLCB4        | 5 | 0 | 5 |
| ALCAM        | 3 | 0 | 3 |
| LOC100131067 | 5 | 0 | 5 |
| DHFR1        | 5 | 0 | 5 |
| ZDHHC21      | 4 | 0 | 4 |
| ISG20        | 2 | 0 | 2 |
| DDX60        | 5 | 0 | 5 |
| ZNF83        | 3 | 0 | 3 |
| IFITM1       | 4 | 0 | 4 |
| C5orf39      | 3 | 0 | 3 |
| SLC39A4      | 3 | 0 | 3 |
| ZNF599       | 6 | 0 | 6 |
| CYBRD1       | 2 | 0 | 2 |
| DHFR         | 5 | 0 | 5 |
| GNG2         | 5 | 0 | 5 |
| NOS3         | 4 | 0 | 4 |

|           |   |   |   |
|-----------|---|---|---|
| LRRC50    | 5 | 0 | 5 |
| ATG101    | 3 | 0 | 3 |
| FLJ322551 | 5 | 0 | 5 |
| HLA-C1    | 5 | 0 | 5 |
| FXVD3     | 4 | 0 | 4 |
| TMEM167A  | 5 | 0 | 5 |
| BLVRA     | 4 | 0 | 4 |
| HLA-C     | 4 | 0 | 4 |
| FGF19     | 4 | 0 | 4 |
| NAV1      | 4 | 0 | 4 |
| HLA-B     | 7 | 0 | 7 |
| VNN1      | 4 | 0 | 4 |
| DNAJA41   | 3 | 0 | 3 |
| MAPRE2    | 5 | 0 | 5 |
| FLJ32255  | 3 | 0 | 3 |
| ZDHHC2    | 1 | 0 | 1 |
| CACNG4    | 3 | 0 | 3 |
| DNAJA4    | 5 | 0 | 5 |
| EML2      | 4 | 0 | 4 |
| CLEC4G    | 3 | 0 | 3 |
| SLC19A1   | 3 | 0 | 3 |
| XRCC4     | 5 | 0 | 5 |
| FERMT1    | 3 | 0 | 3 |
| SAMHD11   | 7 | 0 | 7 |
| PLTP      | 3 | 0 | 3 |
| BGN       | 3 | 0 | 3 |
| HEPH      | 3 | 0 | 3 |
| ZCCHC9    | 5 | 0 | 5 |
| IFITM2    | 2 | 0 | 2 |
| SCIN      | 5 | 0 | 5 |
| CD99      | 3 | 0 | 3 |
| ATG10     | 5 | 0 | 5 |
| HCP5      | 4 | 0 | 4 |
| FAIM2     | 4 | 0 | 4 |
| IFI44     | 4 | 0 | 4 |
| SSBP2     | 2 | 0 | 2 |
| SAMHD1    | 7 | 0 | 7 |
| ANXA13    | 2 | 0 | 2 |
| NNMT      | 2 | 0 | 2 |
| IGFBP71   | 7 | 0 | 7 |
| DNAJC15   | 4 | 0 | 4 |
| PRSS1     | 3 | 0 | 3 |
| CMPK2     | 3 | 0 | 3 |
| GLIPR1    | 4 | 0 | 4 |

|                |   |     |     |
|----------------|---|-----|-----|
| ATP6AP1L       | 3 | 0   | 3   |
| NKX2-1         | 3 | 0   | 3   |
| RPS23          | 4 | 0   | 4   |
| ARMCX4         | 7 | 0   | 7   |
| BST2           | 4 | 0   | 4   |
| hsa-miR-452    | 0 | 186 | 186 |
| IGFBP7         | 6 | 0   | 6   |
| hsa-miR-155    | 0 | 39  | 39  |
| PDZK1IP1       | 4 | 0   | 4   |
| hsa-miR-215    | 0 | 35  | 35  |
| hsa-miR-552    | 0 | 424 | 424 |
| hsa-miR-338-3p | 0 | 252 | 252 |
| hsa-miR-29b-1  | 0 | 428 | 428 |
| IFI27          | 4 | 0   | 4   |
| hsa-miR-224    | 0 | 337 | 337 |
